# Supplementary material for: Transcriptomic Analysis of Grapevine (cv. Summer Black) Leaf, Using the Illumina Platform
Source: PLoS One. 2016 Jan 29;11(1):e0147369. doi: 10.1371/journal.pone.0147369 (PMC4732810; doi:10.1371/journal.pone.0147369)
Supplement: S1 File — (XLSX) [file pone.0147369.s001.xlsx]

## Sheet: Sheet1
	Primers used for real time analysis
S.N.	Transcript ID			Function	Primer saequence
1	GSVIVT01017885001			isopentenyltransferase 5	AAAATTCACCGGCTGCAGAAC
					GAACCGGAACCACAATGTTGG
2	GSVIVT01031544001			beta-1,3-glucanase	GCATTGGAAGCATGCGAATCT
					CGTTGTTTTGCACCCAGGTAG
3	GSVIVT010096040013			cytochrome P450, family 82, subfamily C, polypeptide 4	TCAACAAAGCCACATCCCTGA
					GGGGCTGCTGGATATAACCTC
4	GSVIVT01019965001			expansin A1	TCAACAAAGCCACATCCCTGA
					GGGGCTGCTGGATATAACCTC
5	GSVIVT01021816001			NAD(P)-linked oxidoreductase superfamily protein	GGCACTGACACTACATCTGGT
					TGAAAGTGGGGCTGTTGGATT
6	GSVIVT01023905001			Transmembrane amino acid transporter family protein	TCCCCAACTTGAACTCGATGG
					TTGCCATCCTTGATTCTGCCT
7	GSVIVT01027210001			NADH:cytochrome B5 reductase 1	CAAAGGCTGCTTAGACCCAGA
					GGCCTGATAACTTCTGCACCT
8	GSVIVT01011596001			cyclin J18	TGACCGATTCTACCCCTGTCT
					TTCATGGAAAGAGGCCGAGAA
9	GSVIVT01000449001			myb domain protein 15	TGCAGCTCAGTTACCAGGAAG
					CTGTGGGGAAAATGGGTAGCT
10	GSVIVT01010567001			phosphatidic acid phosphohydrolase 2	AGAAAGCCCACCAATCCTACC
					ACTGCAGAACCGTGCAATTTT
