# Supplementary material for: Transcriptomic Analysis of Grapevine (cv. Summer Black) Leaf, Using the Illumina Platform
Source: PLoS One. 2016 Jan 29;11(1):e0147369. doi: 10.1371/journal.pone.0147369 (PMC4732810; doi:10.1371/journal.pone.0147369)
Supplement: S2 File — (XLSX) [file pone.0147369.s002.xlsx]

## Sheet: 1Avs2A
Differentially expressed genes
cellular_component	Gene Ontology term	Cluster frequency	Genome frequency of use	Corrected P-value
cellular_component	intrinsic to membrane	72 out of 353 genes, 20.4%	1133 out of 9574 genes, 11.8%	9.6e-05
cellular_component	external encapsulating structure	29 out of 353 genes, 8.2%	327 out of 9574 genes, 3.4%	0.00052
cellular_component	cell wall	15 out of 353 genes, 4.2%	139 out of 9574 genes, 1.5%	0.00933
cellular_component	cell periphery	29 out of 353 genes, 8.2%	385 out of 9574 genes, 4.0%	0.01028
cellular_component	membrane part	73 out of 353 genes, 20.7%	1391 out of 9574 genes, 14.5%	0.04577
cellular_component	integral to membrane	5 out of 353 genes, 1.4%	49 out of 9574 genes, 0.5%	1
cellular_component	membrane	116 out of 353 genes, 32.9%	2752 out of 9574 genes, 28.7%	1
cellular_component	cytoplasmic vesicle	23 out of 353 genes, 6.5%	433 out of 9574 genes, 4.5%	1
cellular_component	vesicle	23 out of 353 genes, 6.5%	438 out of 9574 genes, 4.6%	1
cellular_component	plant-type vacuole	4 out of 353 genes, 1.1%	44 out of 9574 genes, 0.5%	1
cellular_component	extracellular region	14 out of 353 genes, 4.0%	250 out of 9574 genes, 2.6%	1
cellular_component	anchored to membrane	3 out of 353 genes, 0.8%	33 out of 9574 genes, 0.3%	1
cellular_component	chromatin	3 out of 353 genes, 0.8%	48 out of 9574 genes, 0.5%	1
cellular_component	vacuole	4 out of 353 genes, 1.1%	74 out of 9574 genes, 0.8%	1
cellular_component	actin cytoskeleton	2 out of 353 genes, 0.6%	39 out of 9574 genes, 0.4%	1
cellular_component	chromosomal part	3 out of 353 genes, 0.8%	98 out of 9574 genes, 1.0%	1
cellular_component	microbody	4 out of 353 genes, 1.1%	139 out of 9574 genes, 1.5%	1
cellular_component	cytoskeleton	5 out of 353 genes, 1.4%	174 out of 9574 genes, 1.8%	1
cellular_component	ribosome	2 out of 353 genes, 0.6%	92 out of 9574 genes, 1.0%	1
cellular_component	chromosome	3 out of 353 genes, 0.8%	138 out of 9574 genes, 1.4%	1
cellular_component	microtubule cytoskeleton	2 out of 353 genes, 0.6%	118 out of 9574 genes, 1.2%	1
cellular_component	non-membrane-bounded organelle	11 out of 353 genes, 3.1%	449 out of 9574 genes, 4.7%	1
cellular_component	intracellular non-membrane-bounded organelle	11 out of 353 genes, 3.1%	449 out of 9574 genes, 4.7%	1
cellular_component	organelle inner membrane	3 out of 353 genes, 0.8%	186 out of 9574 genes, 1.9%	1
cellular_component	chloroplast thylakoid	4 out of 353 genes, 1.1%	266 out of 9574 genes, 2.8%	1
cellular_component	thylakoid	5 out of 353 genes, 1.4%	323 out of 9574 genes, 3.4%	1
cellular_component	plastid thylakoid	4 out of 353 genes, 1.1%	284 out of 9574 genes, 3.0%	1
cellular_component	organelle subcompartment	4 out of 353 genes, 1.1%	284 out of 9574 genes, 3.0%	1
cellular_component	chloroplast part	4 out of 353 genes, 1.1%	308 out of 9574 genes, 3.2%	1
cellular_component	plastid envelope	5 out of 353 genes, 1.4%	355 out of 9574 genes, 3.7%	1
cellular_component	chloroplast	4 out of 353 genes, 1.1%	321 out of 9574 genes, 3.4%	1
cellular_component	organelle membrane	10 out of 353 genes, 2.8%	608 out of 9574 genes, 6.4%	1
cellular_component	organelle envelope	8 out of 353 genes, 2.3%	563 out of 9574 genes, 5.9%	1
cellular_component	envelope	8 out of 353 genes, 2.3%	571 out of 9574 genes, 6.0%	1
cellular_component	plastid stroma	2 out of 353 genes, 0.6%	366 out of 9574 genes, 3.8%	1
cellular_component	plastid part	10 out of 353 genes, 2.8%	787 out of 9574 genes, 8.2%	1
cellular_component	ribonucleoprotein complex	2 out of 353 genes, 0.6%	403 out of 9574 genes, 4.2%	1
cellular_component	protein complex	8 out of 353 genes, 2.3%	753 out of 9574 genes, 7.9%	1
cellular_component	plastid	34 out of 353 genes, 9.6%	1831 out of 9574 genes, 19.1%	1
cellular_component	cytoplasmic part	69 out of 353 genes, 19.5%	3016 out of 9574 genes, 31.5%	1
cellular_component	cytoplasm	69 out of 353 genes, 19.5%	3024 out of 9574 genes, 31.6%	1
cellular_component	cell	251 out of 353 genes, 71.1%	7912 out of 9574 genes, 82.6%	1
cellular_component	cell part	251 out of 353 genes, 71.1%	7912 out of 9574 genes, 82.6%	1
cellular_component	organelle	168 out of 353 genes, 47.6%	5962 out of 9574 genes, 62.3%	1
cellular_component	intracellular organelle	163 out of 353 genes, 46.2%	5874 out of 9574 genes, 61.4%	1
cellular_component	intracellular	179 out of 353 genes, 50.7%	6756 out of 9574 genes, 70.6%	1
cellular_component	macromolecular complex	11 out of 353 genes, 3.1%	1215 out of 9574 genes, 12.7%	1
cellular_component	membrane-bounded organelle	140 out of 353 genes, 39.7%	5407 out of 9574 genes, 56.5%	1
cellular_component	intracellular membrane-bounded organelle	133 out of 353 genes, 37.7%	5273 out of 9574 genes, 55.1%	1
cellular_component	organelle part	21 out of 353 genes, 5.9%	1789 out of 9574 genes, 18.7%	1
cellular_component	intracellular part	179 out of 353 genes, 50.7%	6730 out of 9574 genes, 70.3%	1
cellular_component	intracellular organelle part	16 out of 353 genes, 4.5%	1552 out of 9574 genes, 16.2%	1
molecular_function	iron ion binding	61 out of 654 genes, 9.3%	388 out of 12888 genes, 3.0%	2.87e-13
molecular_function	oxidoreductase activity	140 out of 654 genes, 21.4%	1713 out of 12888 genes, 13.3%	5.02e-07
molecular_function	catalytic activity	511 out of 654 genes, 78.1%	8776 out of 12888 genes, 68.1%	6.35e-07
molecular_function	monooxygenase activity	28 out of 654 genes, 4.3%	212 out of 12888 genes, 1.6%	0.00057
molecular_function	transition metal ion binding	107 out of 654 genes, 16.4%	1554 out of 12888 genes, 12.1%	0.09335
molecular_function	oxidoreductase activity, acting on paired donors, with incorporation or reduction of molecular oxygen	24 out of 654 genes, 3.7%	236 out of 12888 genes, 1.8%	0.16585
molecular_function	oxidoreductase activity, oxidizing metal ions, oxygen as acceptor	3 out of 654 genes, 0.5%	5 out of 12888 genes, 0.0%	0.21558
molecular_function	antioxidant activity	16 out of 654 genes, 2.4%	135 out of 12888 genes, 1.0%	0.23858
molecular_function	nucleic acid binding transcription factor activity	31 out of 654 genes, 4.7%	352 out of 12888 genes, 2.7%	0.3566
molecular_function	metal ion binding	138 out of 654 genes, 21.1%	2182 out of 12888 genes, 16.9%	0.46162
molecular_function	oxidoreductase activity, acting on single donors with incorporation of molecular oxygen	12 out of 654 genes, 1.8%	94 out of 12888 genes, 0.7%	0.49616
molecular_function	oxidoreductase activity, acting on paired donors, with incorporation or reduction of molecular oxygen, NAD(P)H as one donor, and incorporation of one atom of oxygen	12 out of 654 genes, 1.8%	95 out of 12888 genes, 0.7%	0.54241
molecular_function	oxidoreductase activity, oxidizing metal ions	3 out of 654 genes, 0.5%	7 out of 12888 genes, 0.1%	0.69881
molecular_function	carboxylesterase activity	15 out of 654 genes, 2.3%	139 out of 12888 genes, 1.1%	0.8261
molecular_function	amine transmembrane transporter activity	6 out of 654 genes, 0.9%	32 out of 12888 genes, 0.2%	0.87346
molecular_function	carboxylic ester hydrolase activity	15 out of 654 genes, 2.3%	141 out of 12888 genes, 1.1%	0.94361
molecular_function	carbon-oxygen lyase activity, acting on polysaccharides	4 out of 654 genes, 0.6%	15 out of 12888 genes, 0.1%	1
molecular_function	transferase activity, transferring acyl groups other than amino-acyl groups	22 out of 654 genes, 3.4%	246 out of 12888 genes, 1.9%	1
molecular_function	transferase activity, transferring acyl groups	24 out of 654 genes, 3.7%	276 out of 12888 genes, 2.1%	1
molecular_function	dioxygenase activity	12 out of 654 genes, 1.8%	111 out of 12888 genes, 0.9%	1
molecular_function	peroxidase activity	4 out of 654 genes, 0.6%	19 out of 12888 genes, 0.1%	1
molecular_function	oxidoreductase activity, acting on peroxide as acceptor	4 out of 654 genes, 0.6%	19 out of 12888 genes, 0.1%	1
molecular_function	oxidoreductase activity, acting on single donors with incorporation of molecular oxygen, incorporation of two atoms of oxygen	5 out of 654 genes, 0.8%	29 out of 12888 genes, 0.2%	1
molecular_function	cation binding	145 out of 654 genes, 22.2%	2443 out of 12888 genes, 19.0%	1
molecular_function	ion binding	155 out of 654 genes, 23.7%	2643 out of 12888 genes, 20.5%	1
molecular_function	amino acid binding	2 out of 654 genes, 0.3%	5 out of 12888 genes, 0.0%	1
molecular_function	carboxylic acid transmembrane transporter activity	4 out of 654 genes, 0.6%	24 out of 12888 genes, 0.2%	1
molecular_function	hydrolase activity, hydrolyzing O-glycosyl compounds	24 out of 654 genes, 3.7%	320 out of 12888 genes, 2.5%	1
molecular_function	enzyme inhibitor activity	3 out of 654 genes, 0.5%	15 out of 12888 genes, 0.1%	1
molecular_function	acylglycerol O-acyltransferase activity	3 out of 654 genes, 0.5%	15 out of 12888 genes, 0.1%	1
molecular_function	organic acid transmembrane transporter activity	5 out of 654 genes, 0.8%	37 out of 12888 genes, 0.3%	1
molecular_function	cellulose synthase activity	5 out of 654 genes, 0.8%	37 out of 12888 genes, 0.3%	1
molecular_function	organic anion transmembrane transporter activity	4 out of 654 genes, 0.6%	26 out of 12888 genes, 0.2%	1
molecular_function	carboxypeptidase activity	6 out of 654 genes, 0.9%	51 out of 12888 genes, 0.4%	1
molecular_function	hydrolase activity, acting on glycosyl bonds	31 out of 654 genes, 4.7%	452 out of 12888 genes, 3.5%	1
molecular_function	oxidoreductase activity, acting on the aldehyde or oxo group of donors, oxygen as acceptor	2 out of 654 genes, 0.3%	8 out of 12888 genes, 0.1%	1
molecular_function	amino acid transmembrane transporter activity	3 out of 654 genes, 0.5%	18 out of 12888 genes, 0.1%	1
molecular_function	peptidase regulator activity	3 out of 654 genes, 0.5%	18 out of 12888 genes, 0.1%	1
molecular_function	endopeptidase regulator activity	3 out of 654 genes, 0.5%	18 out of 12888 genes, 0.1%	1
molecular_function	DNA binding	23 out of 654 genes, 3.5%	322 out of 12888 genes, 2.5%	1
molecular_function	carbon-oxygen lyase activity	11 out of 654 genes, 1.7%	131 out of 12888 genes, 1.0%	1
molecular_function	oxidoreductase activity, acting on the aldehyde or oxo group of donors	7 out of 654 genes, 1.1%	72 out of 12888 genes, 0.6%	1
molecular_function	water transmembrane transporter activity	2 out of 654 genes, 0.3%	9 out of 12888 genes, 0.1%	1
molecular_function	fatty acid ligase activity	2 out of 654 genes, 0.3%	9 out of 12888 genes, 0.1%	1
molecular_function	hydrolase activity	156 out of 654 genes, 23.9%	2778 out of 12888 genes, 21.6%	1
molecular_function	endopeptidase inhibitor activity	2 out of 654 genes, 0.3%	10 out of 12888 genes, 0.1%	1
molecular_function	peptidase inhibitor activity	2 out of 654 genes, 0.3%	10 out of 12888 genes, 0.1%	1
molecular_function	transferase activity, transferring glycosyl groups	31 out of 654 genes, 4.7%	476 out of 12888 genes, 3.7%	1
molecular_function	enzyme regulator activity	11 out of 654 genes, 1.7%	140 out of 12888 genes, 1.1%	1
molecular_function	transferase activity, transferring hexosyl groups	20 out of 654 genes, 3.1%	290 out of 12888 genes, 2.3%	1
molecular_function	anion transmembrane transporter activity	6 out of 654 genes, 0.9%	64 out of 12888 genes, 0.5%	1
molecular_function	oxidoreductase activity, acting on paired donors, with incorporation or reduction of molecular oxygen, 2-oxoglutarate as one donor, and incorporation of one atom each of oxygen into both donors	7 out of 654 genes, 1.1%	82 out of 12888 genes, 0.6%	1
molecular_function	transmembrane transporter activity	47 out of 654 genes, 7.2%	783 out of 12888 genes, 6.1%	1
molecular_function	active transmembrane transporter activity	22 out of 654 genes, 3.4%	338 out of 12888 genes, 2.6%	1
molecular_function	secondary active transmembrane transporter activity	10 out of 654 genes, 1.5%	134 out of 12888 genes, 1.0%	1
molecular_function	transaminase activity	5 out of 654 genes, 0.8%	55 out of 12888 genes, 0.4%	1
molecular_function	oxidoreductase activity, acting on the CH-NH2 group of donors, oxygen as acceptor	3 out of 654 genes, 0.5%	27 out of 12888 genes, 0.2%	1
molecular_function	metal cluster binding	7 out of 654 genes, 1.1%	89 out of 12888 genes, 0.7%	1
molecular_function	oxidoreductase activity, acting on CH-OH group of donors	15 out of 654 genes, 2.3%	224 out of 12888 genes, 1.7%	1
molecular_function	iron-sulfur cluster binding	5 out of 654 genes, 0.8%	58 out of 12888 genes, 0.5%	1
molecular_function	alkali metal ion binding	2 out of 654 genes, 0.3%	15 out of 12888 genes, 0.1%	1
molecular_function	glucosyltransferase activity	9 out of 654 genes, 1.4%	124 out of 12888 genes, 1.0%	1
molecular_function	peptidase activity	28 out of 654 genes, 4.3%	464 out of 12888 genes, 3.6%	1
molecular_function	cofactor binding	26 out of 654 genes, 4.0%	429 out of 12888 genes, 3.3%	1
molecular_function	aldo-keto reductase (NADP) activity	2 out of 654 genes, 0.3%	17 out of 12888 genes, 0.1%	1
molecular_function	solute:hydrogen antiporter activity	2 out of 654 genes, 0.3%	17 out of 12888 genes, 0.1%	1
molecular_function	oxidoreductase activity, acting on paired donors, with incorporation or reduction of molecular oxygen, reduced flavin or flavoprotein as one donor, and incorporation of one atom of oxygen	2 out of 654 genes, 0.3%	17 out of 12888 genes, 0.1%	1
molecular_function	polysaccharide binding	2 out of 654 genes, 0.3%	17 out of 12888 genes, 0.1%	1
molecular_function	transferase activity, transferring nitrogenous groups	5 out of 654 genes, 0.8%	63 out of 12888 genes, 0.5%	1
molecular_function	oxidoreductase activity, acting on the CH-OH group of donors, NAD or NADP as acceptor	12 out of 654 genes, 1.8%	183 out of 12888 genes, 1.4%	1
molecular_function	organic phosphonate transmembrane transporter activity	3 out of 654 genes, 0.5%	32 out of 12888 genes, 0.2%	1
molecular_function	O-acyltransferase activity	3 out of 654 genes, 0.5%	34 out of 12888 genes, 0.3%	1
molecular_function	racemase and epimerase activity, acting on carbohydrates and derivatives	2 out of 654 genes, 0.3%	19 out of 12888 genes, 0.1%	1
molecular_function	O-methyltransferase activity	3 out of 654 genes, 0.5%	35 out of 12888 genes, 0.3%	1
molecular_function	pattern binding	2 out of 654 genes, 0.3%	20 out of 12888 genes, 0.2%	1
molecular_function	peptidase activity, acting on L-amino acid peptides	26 out of 654 genes, 4.0%	450 out of 12888 genes, 3.5%	1
molecular_function	solute:cation antiporter activity	2 out of 654 genes, 0.3%	21 out of 12888 genes, 0.2%	1
molecular_function	substrate-specific transmembrane transporter activity	31 out of 654 genes, 4.7%	552 out of 12888 genes, 4.3%	1
molecular_function	oxidoreductase activity, acting on the CH-CH group of donors, oxygen as acceptor	2 out of 654 genes, 0.3%	22 out of 12888 genes, 0.2%	1
molecular_function	identical protein binding	3 out of 654 genes, 0.5%	39 out of 12888 genes, 0.3%	1
molecular_function	endopeptidase activity	15 out of 654 genes, 2.3%	256 out of 12888 genes, 2.0%	1
molecular_function	steroid dehydrogenase activity, acting on the CH-OH group of donors, NAD or NADP as acceptor	2 out of 654 genes, 0.3%	23 out of 12888 genes, 0.2%	1
molecular_function	transporter activity	50 out of 654 genes, 7.6%	921 out of 12888 genes, 7.1%	1
molecular_function	hydrolase activity, acting on ester bonds	38 out of 654 genes, 5.8%	698 out of 12888 genes, 5.4%	1
molecular_function	S-adenosylmethionine-dependent methyltransferase activity	4 out of 654 genes, 0.6%	60 out of 12888 genes, 0.5%	1
molecular_function	steroid dehydrogenase activity	2 out of 654 genes, 0.3%	25 out of 12888 genes, 0.2%	1
molecular_function	transferase activity, transferring sulfur-containing groups	2 out of 654 genes, 0.3%	25 out of 12888 genes, 0.2%	1
molecular_function	transition metal ion transmembrane transporter activity	2 out of 654 genes, 0.3%	25 out of 12888 genes, 0.2%	1
molecular_function	exopeptidase activity	6 out of 654 genes, 0.9%	98 out of 12888 genes, 0.8%	1
molecular_function	oxidoreductase activity, acting on the CH-CH group of donors	16 out of 654 genes, 2.4%	288 out of 12888 genes, 2.2%	1
molecular_function	antiporter activity	2 out of 654 genes, 0.3%	27 out of 12888 genes, 0.2%	1
molecular_function	racemase and epimerase activity	2 out of 654 genes, 0.3%	27 out of 12888 genes, 0.2%	1
molecular_function	lyase activity	20 out of 654 genes, 3.1%	368 out of 12888 genes, 2.9%	1
molecular_function	methyltransferase activity	11 out of 654 genes, 1.7%	199 out of 12888 genes, 1.5%	1
molecular_function	inorganic anion transmembrane transporter activity	2 out of 654 genes, 0.3%	29 out of 12888 genes, 0.2%	1
molecular_function	oxidoreductase activity, acting on the CH-NH2 group of donors	3 out of 654 genes, 0.5%	48 out of 12888 genes, 0.4%	1
molecular_function	oxidoreductase activity, acting on the CH-CH group of donors, NAD or NADP as acceptor	13 out of 654 genes, 2.0%	240 out of 12888 genes, 1.9%	1
molecular_function	ligase activity, forming carbon-sulfur bonds	2 out of 654 genes, 0.3%	30 out of 12888 genes, 0.2%	1
molecular_function	N-acyltransferase activity	3 out of 654 genes, 0.5%	49 out of 12888 genes, 0.4%	1
molecular_function	transferase activity, transferring alkyl or aryl (other than methyl) groups	5 out of 654 genes, 0.8%	89 out of 12888 genes, 0.7%	1
molecular_function	carbohydrate transmembrane transporter activity	2 out of 654 genes, 0.3%	32 out of 12888 genes, 0.2%	1
molecular_function	carbohydrate transporter activity	2 out of 654 genes, 0.3%	32 out of 12888 genes, 0.2%	1
molecular_function	coenzyme binding	8 out of 654 genes, 1.2%	150 out of 12888 genes, 1.2%	1
molecular_function	galactosyltransferase activity	2 out of 654 genes, 0.3%	33 out of 12888 genes, 0.3%	1
molecular_function	oxidoreductase activity, acting on diphenols and related substances as donors, oxygen as acceptor	4 out of 654 genes, 0.6%	76 out of 12888 genes, 0.6%	1
molecular_function	substrate-specific transporter activity	32 out of 654 genes, 4.9%	652 out of 12888 genes, 5.1%	1
molecular_function	cation channel activity	2 out of 654 genes, 0.3%	40 out of 12888 genes, 0.3%	1
molecular_function	oxidoreductase activity, acting on diphenols and related substances as donors	4 out of 654 genes, 0.6%	83 out of 12888 genes, 0.6%	1
molecular_function	metal ion transmembrane transporter activity	5 out of 654 genes, 0.8%	106 out of 12888 genes, 0.8%	1
molecular_function	oxidoreductase activity, acting on the aldehyde or oxo group of donors, NAD or NADP as acceptor	2 out of 654 genes, 0.3%	43 out of 12888 genes, 0.3%	1
molecular_function	hydrogen ion transmembrane transporter activity	3 out of 654 genes, 0.5%	67 out of 12888 genes, 0.5%	1
molecular_function	phosphatase activity	13 out of 654 genes, 2.0%	280 out of 12888 genes, 2.2%	1
molecular_function	carboxylic acid binding	2 out of 654 genes, 0.3%	46 out of 12888 genes, 0.4%	1
molecular_function	anion binding	2 out of 654 genes, 0.3%	47 out of 12888 genes, 0.4%	1
molecular_function	protein tyrosine kinase activity	4 out of 654 genes, 0.6%	93 out of 12888 genes, 0.7%	1
molecular_function	ion transmembrane transporter activity	19 out of 654 genes, 2.9%	413 out of 12888 genes, 3.2%	1
molecular_function	glucosidase activity	3 out of 654 genes, 0.5%	72 out of 12888 genes, 0.6%	1
molecular_function	hydro-lyase activity	3 out of 654 genes, 0.5%	74 out of 12888 genes, 0.6%	1
molecular_function	isomerase activity	11 out of 654 genes, 1.7%	254 out of 12888 genes, 2.0%	1
molecular_function	motor activity	3 out of 654 genes, 0.5%	76 out of 12888 genes, 0.6%	1
molecular_function	UDP-glucosyltransferase activity	3 out of 654 genes, 0.5%	77 out of 12888 genes, 0.6%	1
molecular_function	inorganic cation transmembrane transporter activity	7 out of 654 genes, 1.1%	169 out of 12888 genes, 1.3%	1
molecular_function	primary active transmembrane transporter activity	7 out of 654 genes, 1.1%	172 out of 12888 genes, 1.3%	1
molecular_function	P-P-bond-hydrolysis-driven transmembrane transporter activity	7 out of 654 genes, 1.1%	172 out of 12888 genes, 1.3%	1
molecular_function	transferase activity	147 out of 654 genes, 22.5%	3047 out of 12888 genes, 23.6%	1
molecular_function	nuclease activity	4 out of 654 genes, 0.6%	111 out of 12888 genes, 0.9%	1
molecular_function	monovalent inorganic cation transmembrane transporter activity	5 out of 654 genes, 0.8%	135 out of 12888 genes, 1.0%	1
molecular_function	phosphoric ester hydrolase activity	13 out of 654 genes, 2.0%	319 out of 12888 genes, 2.5%	1
molecular_function	carbon-sulfur lyase activity	2 out of 654 genes, 0.3%	62 out of 12888 genes, 0.5%	1
molecular_function	enzyme binding	2 out of 654 genes, 0.3%	63 out of 12888 genes, 0.5%	1
molecular_function	ATPase activity, coupled to transmembrane movement of substances	5 out of 654 genes, 0.8%	140 out of 12888 genes, 1.1%	1
molecular_function	ATPase activity, coupled to movement of substances	5 out of 654 genes, 0.8%	141 out of 12888 genes, 1.1%	1
molecular_function	carbohydrate binding	3 out of 654 genes, 0.5%	92 out of 12888 genes, 0.7%	1
molecular_function	intramolecular transferase activity	2 out of 654 genes, 0.3%	66 out of 12888 genes, 0.5%	1
molecular_function	oxidoreductase activity, acting on NAD(P)H	3 out of 654 genes, 0.5%	94 out of 12888 genes, 0.7%	1
molecular_function	hydrolase activity, acting on acid anhydrides, catalyzing transmembrane movement of substances	5 out of 654 genes, 0.8%	145 out of 12888 genes, 1.1%	1
molecular_function	ion channel activity	2 out of 654 genes, 0.3%	69 out of 12888 genes, 0.5%	1
molecular_function	substrate-specific channel activity	2 out of 654 genes, 0.3%	69 out of 12888 genes, 0.5%	1
molecular_function	carboxy-lyase activity	2 out of 654 genes, 0.3%	70 out of 12888 genes, 0.5%	1
molecular_function	channel activity	2 out of 654 genes, 0.3%	71 out of 12888 genes, 0.6%	1
molecular_function	passive transmembrane transporter activity	2 out of 654 genes, 0.3%	71 out of 12888 genes, 0.6%	1
molecular_function	small conjugating protein ligase activity	3 out of 654 genes, 0.5%	106 out of 12888 genes, 0.8%	1
molecular_function	transferase activity, transferring one-carbon groups	12 out of 654 genes, 1.8%	328 out of 12888 genes, 2.5%	1
molecular_function	cation transmembrane transporter activity	10 out of 654 genes, 1.5%	281 out of 12888 genes, 2.2%	1
molecular_function	carbon-carbon lyase activity	3 out of 654 genes, 0.5%	111 out of 12888 genes, 0.9%	1
molecular_function	cytoskeletal protein binding	2 out of 654 genes, 0.3%	88 out of 12888 genes, 0.7%	1
molecular_function	oxidoreductase activity, acting on a sulfur group of donors	2 out of 654 genes, 0.3%	91 out of 12888 genes, 0.7%	1
molecular_function	nucleic acid binding	62 out of 654 genes, 9.5%	1465 out of 12888 genes, 11.4%	1
molecular_function	acid-amino acid ligase activity	3 out of 654 genes, 0.5%	128 out of 12888 genes, 1.0%	1
molecular_function	ATPase activity, coupled to transmembrane movement of ions	2 out of 654 genes, 0.3%	98 out of 12888 genes, 0.8%	1
molecular_function	protein kinase activity	35 out of 654 genes, 5.4%	908 out of 12888 genes, 7.0%	1
molecular_function	UDP-glycosyltransferase activity	4 out of 654 genes, 0.6%	176 out of 12888 genes, 1.4%	1
molecular_function	phosphoprotein phosphatase activity	2 out of 654 genes, 0.3%	122 out of 12888 genes, 0.9%	1
molecular_function	phosphotransferase activity, alcohol group as acceptor	35 out of 654 genes, 5.4%	962 out of 12888 genes, 7.5%	1
molecular_function	ligase activity, forming carbon-nitrogen bonds	4 out of 654 genes, 0.6%	206 out of 12888 genes, 1.6%	1
molecular_function	molecular transducer activity	7 out of 654 genes, 1.1%	298 out of 12888 genes, 2.3%	1
molecular_function	kinase activity	44 out of 654 genes, 6.7%	1207 out of 12888 genes, 9.4%	1
molecular_function	ligase activity	9 out of 654 genes, 1.4%	360 out of 12888 genes, 2.8%	1
molecular_function	signal transducer activity	5 out of 654 genes, 0.8%	255 out of 12888 genes, 2.0%	1
molecular_function	pyrophosphatase activity	26 out of 654 genes, 4.0%	824 out of 12888 genes, 6.4%	1
molecular_function	hydrolase activity, acting on acid anhydrides, in phosphorus-containing anhydrides	26 out of 654 genes, 4.0%	828 out of 12888 genes, 6.4%	1
molecular_function	protein serine/threonine kinase activity	5 out of 654 genes, 0.8%	270 out of 12888 genes, 2.1%	1
molecular_function	hydrolase activity, acting on acid anhydrides	26 out of 654 genes, 4.0%	839 out of 12888 genes, 6.5%	1
molecular_function	ATPase activity, coupled	6 out of 654 genes, 0.9%	311 out of 12888 genes, 2.4%	1
molecular_function	nucleoside-triphosphatase activity	22 out of 654 genes, 3.4%	751 out of 12888 genes, 5.8%	1
molecular_function	ATPase activity	6 out of 654 genes, 0.9%	331 out of 12888 genes, 2.6%	1
molecular_function	transferase activity, transferring phosphorus-containing groups	52 out of 654 genes, 8.0%	1527 out of 12888 genes, 11.8%	1
molecular_function	protein binding	17 out of 654 genes, 2.6%	757 out of 12888 genes, 5.9%	1
molecular_function	binding	334 out of 654 genes, 51.1%	7740 out of 12888 genes, 60.1%	1
molecular_function	heterocyclic compound binding	125 out of 654 genes, 19.1%	3652 out of 12888 genes, 28.3%	1
molecular_function	organic cyclic compound binding	125 out of 654 genes, 19.1%	3655 out of 12888 genes, 28.4%	1
molecular_function	nucleotide binding	65 out of 654 genes, 9.9%	2333 out of 12888 genes, 18.1%	1
molecular_function	nucleoside phosphate binding	65 out of 654 genes, 9.9%	2333 out of 12888 genes, 18.1%	1
molecular_function	small molecule binding	66 out of 654 genes, 10.1%	2393 out of 12888 genes, 18.6%	1
molecular_function	adenyl ribonucleotide binding	35 out of 654 genes, 5.4%	1606 out of 12888 genes, 12.5%	1
molecular_function	adenyl nucleotide binding	35 out of 654 genes, 5.4%	1607 out of 12888 genes, 12.5%	1
molecular_function	purine nucleotide binding	36 out of 654 genes, 5.5%	1820 out of 12888 genes, 14.1%	1
molecular_function	ribonucleotide binding	36 out of 654 genes, 5.5%	1819 out of 12888 genes, 14.1%	1
molecular_function	purine ribonucleotide binding	36 out of 654 genes, 5.5%	1819 out of 12888 genes, 14.1%	1
biological_process	external encapsulating structure organization	22 out of 525 genes, 4.2%	158 out of 10716 genes, 1.5%	0.00324
biological_process	fatty acid biosynthetic process	9 out of 525 genes, 1.7%	49 out of 10716 genes, 0.5%	0.20206
biological_process	plant-type cell wall modification	5 out of 525 genes, 1.0%	15 out of 10716 genes, 0.1%	0.20697
biological_process	monocarboxylic acid biosynthetic process	9 out of 525 genes, 1.7%	53 out of 10716 genes, 0.5%	0.36626
biological_process	cell wall organization	10 out of 525 genes, 1.9%	64 out of 10716 genes, 0.6%	0.38119
biological_process	cellular metal ion homeostasis	5 out of 525 genes, 1.0%	18 out of 10716 genes, 0.2%	0.52258
biological_process	plant-type cell wall organization	5 out of 525 genes, 1.0%	20 out of 10716 genes, 0.2%	0.87184
biological_process	metal ion homeostasis	5 out of 525 genes, 1.0%	20 out of 10716 genes, 0.2%	0.87184
biological_process	amine transport	4 out of 525 genes, 0.8%	13 out of 10716 genes, 0.1%	1
biological_process	aminoglycan catabolic process	5 out of 525 genes, 1.0%	21 out of 10716 genes, 0.2%	1
biological_process	lipid localization	8 out of 525 genes, 1.5%	52 out of 10716 genes, 0.5%	1
biological_process	aminoglycan metabolic process	5 out of 525 genes, 1.0%	24 out of 10716 genes, 0.2%	1
biological_process	cell wall modification	5 out of 525 genes, 1.0%	25 out of 10716 genes, 0.2%	1
biological_process	transition metal ion transport	8 out of 525 genes, 1.5%	58 out of 10716 genes, 0.5%	1
biological_process	cell killing	2 out of 525 genes, 0.4%	3 out of 10716 genes, 0.0%	1
biological_process	root system development	9 out of 525 genes, 1.7%	72 out of 10716 genes, 0.7%	1
biological_process	root development	9 out of 525 genes, 1.7%	72 out of 10716 genes, 0.7%	1
biological_process	carbohydrate derivative catabolic process	5 out of 525 genes, 1.0%	29 out of 10716 genes, 0.3%	1
biological_process	plant-type cell wall organization or biogenesis	5 out of 525 genes, 1.0%	31 out of 10716 genes, 0.3%	1
biological_process	fatty acid metabolic process	16 out of 525 genes, 3.0%	183 out of 10716 genes, 1.7%	1
biological_process	cellular cation homeostasis	6 out of 525 genes, 1.1%	44 out of 10716 genes, 0.4%	1
biological_process	positive regulation of metabolic process	2 out of 525 genes, 0.4%	5 out of 10716 genes, 0.0%	1
biological_process	positive regulation of cellular metabolic process	2 out of 525 genes, 0.4%	5 out of 10716 genes, 0.0%	1
biological_process	cell wall organization or biogenesis	10 out of 525 genes, 1.9%	99 out of 10716 genes, 0.9%	1
biological_process	lipid biosynthetic process	12 out of 525 genes, 2.3%	128 out of 10716 genes, 1.2%	1
biological_process	organic acid biosynthetic process	15 out of 525 genes, 2.9%	174 out of 10716 genes, 1.6%	1
biological_process	carboxylic acid biosynthetic process	15 out of 525 genes, 2.9%	174 out of 10716 genes, 1.6%	1
biological_process	single-organism biosynthetic process	23 out of 525 genes, 4.4%	302 out of 10716 genes, 2.8%	1
biological_process	hydrogen peroxide metabolic process	4 out of 525 genes, 0.8%	23 out of 10716 genes, 0.2%	1
biological_process	phenylpropanoid metabolic process	13 out of 525 genes, 2.5%	146 out of 10716 genes, 1.4%	1
biological_process	cellular ion homeostasis	6 out of 525 genes, 1.1%	48 out of 10716 genes, 0.4%	1
biological_process	cellular chemical homeostasis	6 out of 525 genes, 1.1%	48 out of 10716 genes, 0.4%	1
biological_process	organonitrogen compound catabolic process	6 out of 525 genes, 1.1%	50 out of 10716 genes, 0.5%	1
biological_process	nitrogen compound transport	12 out of 525 genes, 2.3%	138 out of 10716 genes, 1.3%	1
biological_process	positive regulation of cellular process	3 out of 525 genes, 0.6%	16 out of 10716 genes, 0.1%	1
biological_process	dehiscence	2 out of 525 genes, 0.4%	7 out of 10716 genes, 0.1%	1
biological_process	single-organism developmental process	29 out of 525 genes, 5.5%	431 out of 10716 genes, 4.0%	1
biological_process	L-serine metabolic process	3 out of 525 genes, 0.6%	18 out of 10716 genes, 0.2%	1
biological_process	small molecule biosynthetic process	19 out of 525 genes, 3.6%	262 out of 10716 genes, 2.4%	1
biological_process	ion transport	29 out of 525 genes, 5.5%	439 out of 10716 genes, 4.1%	1
biological_process	pattern specification process	7 out of 525 genes, 1.3%	72 out of 10716 genes, 0.7%	1
biological_process	monocarboxylic acid metabolic process	18 out of 525 genes, 3.4%	250 out of 10716 genes, 2.3%	1
biological_process	organic acid transport	5 out of 525 genes, 1.0%	45 out of 10716 genes, 0.4%	1
biological_process	carboxylic acid transport	5 out of 525 genes, 1.0%	45 out of 10716 genes, 0.4%	1
biological_process	secondary metabolic process	13 out of 525 genes, 2.5%	168 out of 10716 genes, 1.6%	1
biological_process	anion transport	9 out of 525 genes, 1.7%	107 out of 10716 genes, 1.0%	1
biological_process	cation homeostasis	6 out of 525 genes, 1.1%	62 out of 10716 genes, 0.6%	1
biological_process	sesquiterpenoid metabolic process	2 out of 525 genes, 0.4%	10 out of 10716 genes, 0.1%	1
biological_process	carbohydrate biosynthetic process	7 out of 525 genes, 1.3%	78 out of 10716 genes, 0.7%	1
biological_process	glucan metabolic process	11 out of 525 genes, 2.1%	143 out of 10716 genes, 1.3%	1
biological_process	regionalization	6 out of 525 genes, 1.1%	64 out of 10716 genes, 0.6%	1
biological_process	amino acid transport	4 out of 525 genes, 0.8%	37 out of 10716 genes, 0.3%	1
biological_process	positive regulation of biological process	4 out of 525 genes, 0.8%	37 out of 10716 genes, 0.3%	1
biological_process	post-embryonic root development	4 out of 525 genes, 0.8%	37 out of 10716 genes, 0.3%	1
biological_process	reactive oxygen species metabolic process	4 out of 525 genes, 0.8%	38 out of 10716 genes, 0.4%	1
biological_process	zinc ion transport	2 out of 525 genes, 0.4%	12 out of 10716 genes, 0.1%	1
biological_process	pollen wall assembly	2 out of 525 genes, 0.4%	12 out of 10716 genes, 0.1%	1
biological_process	cellular component assembly involved in morphogenesis	2 out of 525 genes, 0.4%	12 out of 10716 genes, 0.1%	1
biological_process	cellular carbohydrate biosynthetic process	6 out of 525 genes, 1.1%	69 out of 10716 genes, 0.6%	1
biological_process	meristem maintenance	3 out of 525 genes, 0.6%	25 out of 10716 genes, 0.2%	1
biological_process	glucan biosynthetic process	5 out of 525 genes, 1.0%	54 out of 10716 genes, 0.5%	1
biological_process	organic anion transport	5 out of 525 genes, 1.0%	54 out of 10716 genes, 0.5%	1
biological_process	metal ion transport	12 out of 525 genes, 2.3%	169 out of 10716 genes, 1.6%	1
biological_process	peptide transport	4 out of 525 genes, 0.8%	40 out of 10716 genes, 0.4%	1
biological_process	multicellular organism reproduction	2 out of 525 genes, 0.4%	13 out of 10716 genes, 0.1%	1
biological_process	regulation of cellular component size	2 out of 525 genes, 0.4%	13 out of 10716 genes, 0.1%	1
biological_process	multicellular organismal reproductive process	2 out of 525 genes, 0.4%	13 out of 10716 genes, 0.1%	1
biological_process	regulation of anatomical structure size	2 out of 525 genes, 0.4%	13 out of 10716 genes, 0.1%	1
biological_process	post-embryonic morphogenesis	3 out of 525 genes, 0.6%	26 out of 10716 genes, 0.2%	1
biological_process	amide transport	4 out of 525 genes, 0.8%	41 out of 10716 genes, 0.4%	1
biological_process	polysaccharide biosynthetic process	6 out of 525 genes, 1.1%	73 out of 10716 genes, 0.7%	1
biological_process	ion homeostasis	6 out of 525 genes, 1.1%	74 out of 10716 genes, 0.7%	1
biological_process	oligosaccharide metabolic process	4 out of 525 genes, 0.8%	43 out of 10716 genes, 0.4%	1
biological_process	cellular lipid metabolic process	23 out of 525 genes, 4.4%	376 out of 10716 genes, 3.5%	1
biological_process	phenylpropanoid biosynthetic process	7 out of 525 genes, 1.3%	92 out of 10716 genes, 0.9%	1
biological_process	polyamine biosynthetic process	2 out of 525 genes, 0.4%	15 out of 10716 genes, 0.1%	1
biological_process	defense response	13 out of 525 genes, 2.5%	197 out of 10716 genes, 1.8%	1
biological_process	chemical homeostasis	7 out of 525 genes, 1.3%	93 out of 10716 genes, 0.9%	1
biological_process	hormone metabolic process	3 out of 525 genes, 0.6%	30 out of 10716 genes, 0.3%	1
biological_process	anatomical structure morphogenesis	19 out of 525 genes, 3.6%	309 out of 10716 genes, 2.9%	1
biological_process	cellular biogenic amine biosynthetic process	2 out of 525 genes, 0.4%	16 out of 10716 genes, 0.1%	1
biological_process	lipid metabolic process	26 out of 525 genes, 5.0%	441 out of 10716 genes, 4.1%	1
biological_process	secondary metabolite biosynthetic process	7 out of 525 genes, 1.3%	96 out of 10716 genes, 0.9%	1
biological_process	cellular developmental process	15 out of 525 genes, 2.9%	238 out of 10716 genes, 2.2%	1
biological_process	localization	91 out of 525 genes, 17.3%	1702 out of 10716 genes, 15.9%	1
biological_process	response to red or far red light	5 out of 525 genes, 1.0%	63 out of 10716 genes, 0.6%	1
biological_process	drug transport	4 out of 525 genes, 0.8%	47 out of 10716 genes, 0.4%	1
biological_process	response to drug	4 out of 525 genes, 0.8%	47 out of 10716 genes, 0.4%	1
biological_process	cellular homeostasis	10 out of 525 genes, 1.9%	150 out of 10716 genes, 1.4%	1
biological_process	hyperosmotic response	2 out of 525 genes, 0.4%	17 out of 10716 genes, 0.2%	1
biological_process	auxin metabolic process	2 out of 525 genes, 0.4%	17 out of 10716 genes, 0.2%	1
biological_process	shoot system morphogenesis	2 out of 525 genes, 0.4%	17 out of 10716 genes, 0.2%	1
biological_process	lignin metabolic process	4 out of 525 genes, 0.8%	48 out of 10716 genes, 0.4%	1
biological_process	polyamine metabolic process	2 out of 525 genes, 0.4%	18 out of 10716 genes, 0.2%	1
biological_process	ethylene metabolic process	2 out of 525 genes, 0.4%	18 out of 10716 genes, 0.2%	1
biological_process	axis specification	2 out of 525 genes, 0.4%	18 out of 10716 genes, 0.2%	1
biological_process	cellular alkene metabolic process	2 out of 525 genes, 0.4%	18 out of 10716 genes, 0.2%	1
biological_process	olefin metabolic process	2 out of 525 genes, 0.4%	18 out of 10716 genes, 0.2%	1
biological_process	organ development	18 out of 525 genes, 3.4%	302 out of 10716 genes, 2.8%	1
biological_process	inorganic anion transport	4 out of 525 genes, 0.8%	50 out of 10716 genes, 0.5%	1
biological_process	cellular polysaccharide biosynthetic process	5 out of 525 genes, 1.0%	67 out of 10716 genes, 0.6%	1
biological_process	sulfur amino acid biosynthetic process	3 out of 525 genes, 0.6%	34 out of 10716 genes, 0.3%	1
biological_process	steroid metabolic process	3 out of 525 genes, 0.6%	34 out of 10716 genes, 0.3%	1
biological_process	trehalose metabolic process	2 out of 525 genes, 0.4%	19 out of 10716 genes, 0.2%	1
biological_process	steroid biosynthetic process	2 out of 525 genes, 0.4%	19 out of 10716 genes, 0.2%	1
biological_process	amine biosynthetic process	2 out of 525 genes, 0.4%	19 out of 10716 genes, 0.2%	1
biological_process	seed germination	2 out of 525 genes, 0.4%	19 out of 10716 genes, 0.2%	1
biological_process	seedling development	2 out of 525 genes, 0.4%	19 out of 10716 genes, 0.2%	1
biological_process	polysaccharide metabolic process	12 out of 525 genes, 2.3%	194 out of 10716 genes, 1.8%	1
biological_process	gametophyte development	9 out of 525 genes, 1.7%	140 out of 10716 genes, 1.3%	1
biological_process	meristem development	4 out of 525 genes, 0.8%	53 out of 10716 genes, 0.5%	1
biological_process	cellular carbohydrate metabolic process	11 out of 525 genes, 2.1%	179 out of 10716 genes, 1.7%	1
biological_process	sulfur compound biosynthetic process	3 out of 525 genes, 0.6%	37 out of 10716 genes, 0.3%	1
biological_process	recombinational repair	2 out of 525 genes, 0.4%	21 out of 10716 genes, 0.2%	1
biological_process	response to stress	54 out of 525 genes, 10.3%	1014 out of 10716 genes, 9.5%	1
biological_process	response to nutrient levels	5 out of 525 genes, 1.0%	72 out of 10716 genes, 0.7%	1
biological_process	isoprenoid metabolic process	6 out of 525 genes, 1.1%	90 out of 10716 genes, 0.8%	1
biological_process	regulation of biological quality	17 out of 525 genes, 3.2%	295 out of 10716 genes, 2.8%	1
biological_process	anatomical structure formation involved in morphogenesis	3 out of 525 genes, 0.6%	38 out of 10716 genes, 0.4%	1
biological_process	xylem and phloem pattern formation	2 out of 525 genes, 0.4%	22 out of 10716 genes, 0.2%	1
biological_process	post-embryonic organ development	4 out of 525 genes, 0.8%	56 out of 10716 genes, 0.5%	1
biological_process	cellular component morphogenesis	10 out of 525 genes, 1.9%	166 out of 10716 genes, 1.5%	1
biological_process	sulfur amino acid metabolic process	3 out of 525 genes, 0.6%	39 out of 10716 genes, 0.4%	1
biological_process	response to extracellular stimulus	5 out of 525 genes, 1.0%	75 out of 10716 genes, 0.7%	1
biological_process	polyol metabolic process	2 out of 525 genes, 0.4%	23 out of 10716 genes, 0.2%	1
biological_process	regulation of organelle organization	2 out of 525 genes, 0.4%	23 out of 10716 genes, 0.2%	1
biological_process	shoot system development	5 out of 525 genes, 1.0%	76 out of 10716 genes, 0.7%	1
biological_process	single-organism transport	44 out of 525 genes, 8.4%	832 out of 10716 genes, 7.8%	1
biological_process	root morphogenesis	3 out of 525 genes, 0.6%	41 out of 10716 genes, 0.4%	1
biological_process	nucleosome organization	3 out of 525 genes, 0.6%	41 out of 10716 genes, 0.4%	1
biological_process	response to external stimulus	8 out of 525 genes, 1.5%	133 out of 10716 genes, 1.2%	1
biological_process	single-organism carbohydrate metabolic process	16 out of 525 genes, 3.0%	287 out of 10716 genes, 2.7%	1
biological_process	disaccharide metabolic process	3 out of 525 genes, 0.6%	42 out of 10716 genes, 0.4%	1
biological_process	negative regulation of cellular process	3 out of 525 genes, 0.6%	42 out of 10716 genes, 0.4%	1
biological_process	protein-DNA complex subunit organization	3 out of 525 genes, 0.6%	42 out of 10716 genes, 0.4%	1
biological_process	transport	77 out of 525 genes, 14.7%	1503 out of 10716 genes, 14.0%	1
biological_process	carbohydrate metabolic process	25 out of 525 genes, 4.8%	470 out of 10716 genes, 4.4%	1
biological_process	anatomical structure development	33 out of 525 genes, 6.3%	630 out of 10716 genes, 5.9%	1
biological_process	establishment of localization	84 out of 525 genes, 16.0%	1652 out of 10716 genes, 15.4%	1
biological_process	regulation of hormone levels	4 out of 525 genes, 0.8%	63 out of 10716 genes, 0.6%	1
biological_process	embryo development	2 out of 525 genes, 0.4%	27 out of 10716 genes, 0.3%	1
biological_process	developmental cell growth	2 out of 525 genes, 0.4%	27 out of 10716 genes, 0.3%	1
biological_process	homeostatic process	11 out of 525 genes, 2.1%	200 out of 10716 genes, 1.9%	1
biological_process	serine family amino acid metabolic process	3 out of 525 genes, 0.6%	46 out of 10716 genes, 0.4%	1
biological_process	terpenoid metabolic process	4 out of 525 genes, 0.8%	66 out of 10716 genes, 0.6%	1
biological_process	phyllome development	4 out of 525 genes, 0.8%	66 out of 10716 genes, 0.6%	1
biological_process	cellular glucan metabolic process	6 out of 525 genes, 1.1%	106 out of 10716 genes, 1.0%	1
biological_process	regulation of cell cycle	2 out of 525 genes, 0.4%	29 out of 10716 genes, 0.3%	1
biological_process	cation transport	15 out of 525 genes, 2.9%	285 out of 10716 genes, 2.7%	1
biological_process	tissue development	7 out of 525 genes, 1.3%	127 out of 10716 genes, 1.2%	1
biological_process	amine metabolic process	3 out of 525 genes, 0.6%	49 out of 10716 genes, 0.5%	1
biological_process	single organism reproductive process	2 out of 525 genes, 0.4%	30 out of 10716 genes, 0.3%	1
biological_process	negative regulation of molecular function	3 out of 525 genes, 0.6%	50 out of 10716 genes, 0.5%	1
biological_process	multicellular organismal development	36 out of 525 genes, 6.9%	712 out of 10716 genes, 6.6%	1
biological_process	regulation of cellular component organization	2 out of 525 genes, 0.4%	31 out of 10716 genes, 0.3%	1
biological_process	hormone-mediated signaling pathway	8 out of 525 genes, 1.5%	151 out of 10716 genes, 1.4%	1
biological_process	cellular response to hormone stimulus	8 out of 525 genes, 1.5%	151 out of 10716 genes, 1.4%	1
biological_process	cellular response to endogenous stimulus	8 out of 525 genes, 1.5%	151 out of 10716 genes, 1.4%	1
biological_process	single-multicellular organism process	38 out of 525 genes, 7.2%	758 out of 10716 genes, 7.1%	1
biological_process	protein phosphorylation	2 out of 525 genes, 0.4%	32 out of 10716 genes, 0.3%	1
biological_process	cell morphogenesis	8 out of 525 genes, 1.5%	153 out of 10716 genes, 1.4%	1
biological_process	post-embryonic development	14 out of 525 genes, 2.7%	277 out of 10716 genes, 2.6%	1
biological_process	aging	2 out of 525 genes, 0.4%	34 out of 10716 genes, 0.3%	1
biological_process	flavonoid biosynthetic process	3 out of 525 genes, 0.6%	55 out of 10716 genes, 0.5%	1
biological_process	epidermal cell differentiation	2 out of 525 genes, 0.4%	35 out of 10716 genes, 0.3%	1
biological_process	divalent metal ion transport	2 out of 525 genes, 0.4%	35 out of 10716 genes, 0.3%	1
biological_process	divalent inorganic cation transport	2 out of 525 genes, 0.4%	35 out of 10716 genes, 0.3%	1
biological_process	response to hormone stimulus	20 out of 525 genes, 3.8%	405 out of 10716 genes, 3.8%	1
biological_process	organ morphogenesis	3 out of 525 genes, 0.6%	56 out of 10716 genes, 0.5%	1
biological_process	enzyme linked receptor protein signaling pathway	2 out of 525 genes, 0.4%	36 out of 10716 genes, 0.3%	1
biological_process	tropism	2 out of 525 genes, 0.4%	36 out of 10716 genes, 0.3%	1
biological_process	cellular response to starvation	3 out of 525 genes, 0.6%	57 out of 10716 genes, 0.5%	1
biological_process	response to starvation	3 out of 525 genes, 0.6%	57 out of 10716 genes, 0.5%	1
biological_process	response to endogenous stimulus	21 out of 525 genes, 4.0%	430 out of 10716 genes, 4.0%	1
biological_process	cellular amino acid biosynthetic process	6 out of 525 genes, 1.1%	120 out of 10716 genes, 1.1%	1
biological_process	flavonoid metabolic process	3 out of 525 genes, 0.6%	58 out of 10716 genes, 0.5%	1
biological_process	pollen development	2 out of 525 genes, 0.4%	37 out of 10716 genes, 0.3%	1
biological_process	DNA recombination	2 out of 525 genes, 0.4%	38 out of 10716 genes, 0.4%	1
biological_process	epidermis development	2 out of 525 genes, 0.4%	38 out of 10716 genes, 0.4%	1
biological_process	cellular polysaccharide metabolic process	6 out of 525 genes, 1.1%	123 out of 10716 genes, 1.1%	1
biological_process	alcohol metabolic process	3 out of 525 genes, 0.6%	60 out of 10716 genes, 0.6%	1
biological_process	organic hydroxy compound metabolic process	3 out of 525 genes, 0.6%	60 out of 10716 genes, 0.6%	1
biological_process	multicellular organismal process	40 out of 525 genes, 7.6%	832 out of 10716 genes, 7.8%	1
biological_process	cellular biogenic amine metabolic process	2 out of 525 genes, 0.4%	39 out of 10716 genes, 0.4%	1
biological_process	response to light intensity	2 out of 525 genes, 0.4%	39 out of 10716 genes, 0.4%	1
biological_process	phosphorylation	2 out of 525 genes, 0.4%	39 out of 10716 genes, 0.4%	1
biological_process	cellular amine metabolic process	2 out of 525 genes, 0.4%	40 out of 10716 genes, 0.4%	1
biological_process	pigment biosynthetic process	3 out of 525 genes, 0.6%	62 out of 10716 genes, 0.6%	1
biological_process	sulfur compound metabolic process	4 out of 525 genes, 0.8%	84 out of 10716 genes, 0.8%	1
biological_process	cellular response to nutrient levels	3 out of 525 genes, 0.6%	63 out of 10716 genes, 0.6%	1
biological_process	metabolic process	375 out of 525 genes, 71.4%	7698 out of 10716 genes, 71.8%	1
biological_process	hexose metabolic process	6 out of 525 genes, 1.1%	129 out of 10716 genes, 1.2%	1
biological_process	developmental growth	2 out of 525 genes, 0.4%	42 out of 10716 genes, 0.4%	1
biological_process	cell differentiation	7 out of 525 genes, 1.3%	152 out of 10716 genes, 1.4%	1
biological_process	ketone biosynthetic process	3 out of 525 genes, 0.6%	65 out of 10716 genes, 0.6%	1
biological_process	pigment metabolic process	3 out of 525 genes, 0.6%	65 out of 10716 genes, 0.6%	1
biological_process	system development	20 out of 525 genes, 3.8%	429 out of 10716 genes, 4.0%	1
biological_process	reproduction	29 out of 525 genes, 5.5%	619 out of 10716 genes, 5.8%	1
biological_process	developmental process	54 out of 525 genes, 10.3%	1142 out of 10716 genes, 10.7%	1
biological_process	cell growth	3 out of 525 genes, 0.6%	66 out of 10716 genes, 0.6%	1
biological_process	cellular response to extracellular stimulus	3 out of 525 genes, 0.6%	66 out of 10716 genes, 0.6%	1
biological_process	cellular response to external stimulus	3 out of 525 genes, 0.6%	66 out of 10716 genes, 0.6%	1
biological_process	response to radiation	13 out of 525 genes, 2.5%	284 out of 10716 genes, 2.7%	1
biological_process	response to light stimulus	9 out of 525 genes, 1.7%	204 out of 10716 genes, 1.9%	1
biological_process	DNA repair	4 out of 525 genes, 0.8%	93 out of 10716 genes, 0.9%	1
biological_process	cellular response to organic substance	8 out of 525 genes, 1.5%	183 out of 10716 genes, 1.7%	1
biological_process	organic substance transport	20 out of 525 genes, 3.8%	445 out of 10716 genes, 4.2%	1
biological_process	response to DNA damage stimulus	4 out of 525 genes, 0.8%	95 out of 10716 genes, 0.9%	1
biological_process	reproductive process	26 out of 525 genes, 5.0%	578 out of 10716 genes, 5.4%	1
biological_process	regulation of molecular function	4 out of 525 genes, 0.8%	97 out of 10716 genes, 0.9%	1
biological_process	developmental process involved in reproduction	23 out of 525 genes, 4.4%	516 out of 10716 genes, 4.8%	1
biological_process	vitamin metabolic process	2 out of 525 genes, 0.4%	51 out of 10716 genes, 0.5%	1
biological_process	glutamine family amino acid metabolic process	2 out of 525 genes, 0.4%	51 out of 10716 genes, 0.5%	1
biological_process	cell development	5 out of 525 genes, 1.0%	123 out of 10716 genes, 1.1%	1
biological_process	cellular ketone metabolic process	3 out of 525 genes, 0.6%	76 out of 10716 genes, 0.7%	1
biological_process	transcription, DNA-dependent	26 out of 525 genes, 5.0%	587 out of 10716 genes, 5.5%	1
biological_process	RNA biosynthetic process	26 out of 525 genes, 5.0%	587 out of 10716 genes, 5.5%	1
biological_process	carboxylic acid metabolic process	32 out of 525 genes, 6.1%	716 out of 10716 genes, 6.7%	1
biological_process	monosaccharide metabolic process	6 out of 525 genes, 1.1%	149 out of 10716 genes, 1.4%	1
biological_process	cellular component organization	34 out of 525 genes, 6.5%	764 out of 10716 genes, 7.1%	1
biological_process	carbohydrate derivative metabolic process	6 out of 525 genes, 1.1%	150 out of 10716 genes, 1.4%	1
biological_process	cellular response to chemical stimulus	8 out of 525 genes, 1.5%	196 out of 10716 genes, 1.8%	1
biological_process	oxoacid metabolic process	32 out of 525 genes, 6.1%	722 out of 10716 genes, 6.7%	1
biological_process	organic acid metabolic process	32 out of 525 genes, 6.1%	723 out of 10716 genes, 6.7%	1
biological_process	regulation of developmental process	2 out of 525 genes, 0.4%	55 out of 10716 genes, 0.5%	1
biological_process	multi-organism process	9 out of 525 genes, 1.7%	224 out of 10716 genes, 2.1%	1
biological_process	regulation of transcription, DNA-dependent	4 out of 525 genes, 0.8%	107 out of 10716 genes, 1.0%	1
biological_process	regulation of RNA metabolic process	4 out of 525 genes, 0.8%	107 out of 10716 genes, 1.0%	1
biological_process	regulation of RNA biosynthetic process	4 out of 525 genes, 0.8%	107 out of 10716 genes, 1.0%	1
biological_process	cell surface receptor signaling pathway	2 out of 525 genes, 0.4%	57 out of 10716 genes, 0.5%	1
biological_process	nucleoside triphosphate catabolic process	8 out of 525 genes, 1.5%	205 out of 10716 genes, 1.9%	1
biological_process	purine nucleoside triphosphate catabolic process	8 out of 525 genes, 1.5%	205 out of 10716 genes, 1.9%	1
biological_process	ribonucleoside triphosphate catabolic process	8 out of 525 genes, 1.5%	205 out of 10716 genes, 1.9%	1
biological_process	purine ribonucleoside triphosphate catabolic process	8 out of 525 genes, 1.5%	205 out of 10716 genes, 1.9%	1
biological_process	organophosphate catabolic process	8 out of 525 genes, 1.5%	206 out of 10716 genes, 1.9%	1
biological_process	nucleoside phosphate catabolic process	8 out of 525 genes, 1.5%	206 out of 10716 genes, 1.9%	1
biological_process	aromatic compound catabolic process	9 out of 525 genes, 1.7%	231 out of 10716 genes, 2.2%	1
biological_process	cellular nitrogen compound catabolic process	9 out of 525 genes, 1.7%	234 out of 10716 genes, 2.2%	1
biological_process	heterocycle catabolic process	9 out of 525 genes, 1.7%	234 out of 10716 genes, 2.2%	1
biological_process	organic cyclic compound catabolic process	9 out of 525 genes, 1.7%	235 out of 10716 genes, 2.2%	1
biological_process	regulation of macromolecule biosynthetic process	4 out of 525 genes, 0.8%	115 out of 10716 genes, 1.1%	1
biological_process	regulation of cellular macromolecule biosynthetic process	4 out of 525 genes, 0.8%	115 out of 10716 genes, 1.1%	1
biological_process	glucose catabolic process	3 out of 525 genes, 0.6%	90 out of 10716 genes, 0.8%	1
biological_process	hexose catabolic process	3 out of 525 genes, 0.6%	90 out of 10716 genes, 0.8%	1
biological_process	monosaccharide catabolic process	3 out of 525 genes, 0.6%	90 out of 10716 genes, 0.8%	1
biological_process	regulation of gene expression, epigenetic	2 out of 525 genes, 0.4%	64 out of 10716 genes, 0.6%	1
biological_process	regulation of cellular biosynthetic process	4 out of 525 genes, 0.8%	117 out of 10716 genes, 1.1%	1
biological_process	organic cyclic compound biosynthetic process	38 out of 525 genes, 7.2%	887 out of 10716 genes, 8.3%	1
biological_process	regulation of biosynthetic process	4 out of 525 genes, 0.8%	118 out of 10716 genes, 1.1%	1
biological_process	response to biotic stimulus	6 out of 525 genes, 1.1%	168 out of 10716 genes, 1.6%	1
biological_process	nucleobase-containing compound catabolic process	8 out of 525 genes, 1.5%	219 out of 10716 genes, 2.0%	1
biological_process	single-organism carbohydrate catabolic process	3 out of 525 genes, 0.6%	95 out of 10716 genes, 0.9%	1
biological_process	one-carbon metabolic process	8 out of 525 genes, 1.5%	221 out of 10716 genes, 2.1%	1
biological_process	glucose metabolic process	3 out of 525 genes, 0.6%	97 out of 10716 genes, 0.9%	1
biological_process	negative regulation of biological process	3 out of 525 genes, 0.6%	97 out of 10716 genes, 0.9%	1
biological_process	organic substance biosynthetic process	66 out of 525 genes, 12.6%	1509 out of 10716 genes, 14.1%	1
biological_process	biological regulation	51 out of 525 genes, 9.7%	1192 out of 10716 genes, 11.1%	1
biological_process	cellular response to stress	7 out of 525 genes, 1.3%	202 out of 10716 genes, 1.9%	1
biological_process	response to organic substance	20 out of 525 genes, 3.8%	508 out of 10716 genes, 4.7%	1
biological_process	response to stimulus	101 out of 525 genes, 19.2%	2264 out of 10716 genes, 21.1%	1
biological_process	aromatic compound biosynthetic process	36 out of 525 genes, 6.9%	867 out of 10716 genes, 8.1%	1
biological_process	macromolecule localization	11 out of 525 genes, 2.1%	303 out of 10716 genes, 2.8%	1
biological_process	phospholipid metabolic process	2 out of 525 genes, 0.4%	74 out of 10716 genes, 0.7%	1
biological_process	response to carbohydrate stimulus	2 out of 525 genes, 0.4%	76 out of 10716 genes, 0.7%	1
biological_process	energy derivation by oxidation of organic compounds	2 out of 525 genes, 0.4%	76 out of 10716 genes, 0.7%	1
biological_process	biosynthetic process	68 out of 525 genes, 13.0%	1579 out of 10716 genes, 14.7%	1
biological_process	response to abiotic stimulus	24 out of 525 genes, 4.6%	612 out of 10716 genes, 5.7%	1
biological_process	macromolecule catabolic process	8 out of 525 genes, 1.5%	236 out of 10716 genes, 2.2%	1
biological_process	nucleobase-containing compound biosynthetic process	29 out of 525 genes, 5.5%	732 out of 10716 genes, 6.8%	1
biological_process	carbohydrate catabolic process	3 out of 525 genes, 0.6%	109 out of 10716 genes, 1.0%	1
biological_process	cellular biosynthetic process	65 out of 525 genes, 12.4%	1535 out of 10716 genes, 14.3%	1
biological_process	regulation of gene expression	6 out of 525 genes, 1.1%	194 out of 10716 genes, 1.8%	1
biological_process	regulation of nucleobase-containing compound metabolic process	4 out of 525 genes, 0.8%	141 out of 10716 genes, 1.3%	1
biological_process	heterocycle biosynthetic process	33 out of 525 genes, 6.3%	833 out of 10716 genes, 7.8%	1
biological_process	regulation of nitrogen compound metabolic process	4 out of 525 genes, 0.8%	142 out of 10716 genes, 1.3%	1
biological_process	organonitrogen compound biosynthetic process	9 out of 525 genes, 1.7%	274 out of 10716 genes, 2.6%	1
biological_process	response to other organism	4 out of 525 genes, 0.8%	144 out of 10716 genes, 1.3%	1
biological_process	cell morphogenesis involved in differentiation	2 out of 525 genes, 0.4%	86 out of 10716 genes, 0.8%	1
biological_process	ion transmembrane transport	2 out of 525 genes, 0.4%	86 out of 10716 genes, 0.8%	1
biological_process	chromatin organization	3 out of 525 genes, 0.6%	119 out of 10716 genes, 1.1%	1
biological_process	growth	3 out of 525 genes, 0.6%	119 out of 10716 genes, 1.1%	1
biological_process	response to osmotic stress	6 out of 525 genes, 1.1%	203 out of 10716 genes, 1.9%	1
biological_process	cellular component organization or biogenesis	34 out of 525 genes, 6.5%	874 out of 10716 genes, 8.2%	1
biological_process	purine nucleoside triphosphate biosynthetic process	2 out of 525 genes, 0.4%	91 out of 10716 genes, 0.8%	1
biological_process	ribonucleoside triphosphate biosynthetic process	2 out of 525 genes, 0.4%	91 out of 10716 genes, 0.8%	1
biological_process	purine ribonucleoside triphosphate biosynthetic process	2 out of 525 genes, 0.4%	91 out of 10716 genes, 0.8%	1
biological_process	cellular nitrogen compound biosynthetic process	31 out of 525 genes, 5.9%	808 out of 10716 genes, 7.5%	1
biological_process	regulation of cellular metabolic process	5 out of 525 genes, 1.0%	179 out of 10716 genes, 1.7%	1
biological_process	regulation of cellular process	27 out of 525 genes, 5.1%	717 out of 10716 genes, 6.7%	1
biological_process	nucleoside triphosphate biosynthetic process	2 out of 525 genes, 0.4%	92 out of 10716 genes, 0.9%	1
biological_process	regulation of macromolecule metabolic process	6 out of 525 genes, 1.1%	208 out of 10716 genes, 1.9%	1
biological_process	transmembrane transport	2 out of 525 genes, 0.4%	96 out of 10716 genes, 0.9%	1
biological_process	coenzyme metabolic process	2 out of 525 genes, 0.4%	97 out of 10716 genes, 0.9%	1
biological_process	regulation of primary metabolic process	4 out of 525 genes, 0.8%	160 out of 10716 genes, 1.5%	1
biological_process	vesicle-mediated transport	2 out of 525 genes, 0.4%	100 out of 10716 genes, 0.9%	1
biological_process	chromosome organization	3 out of 525 genes, 0.6%	132 out of 10716 genes, 1.2%	1
biological_process	macromolecular complex subunit organization	3 out of 525 genes, 0.6%	133 out of 10716 genes, 1.2%	1
biological_process	flower development	2 out of 525 genes, 0.4%	102 out of 10716 genes, 1.0%	1
biological_process	purine nucleoside triphosphate metabolic process	8 out of 525 genes, 1.5%	278 out of 10716 genes, 2.6%	1
biological_process	ribonucleoside triphosphate metabolic process	8 out of 525 genes, 1.5%	278 out of 10716 genes, 2.6%	1
biological_process	purine ribonucleoside triphosphate metabolic process	8 out of 525 genes, 1.5%	278 out of 10716 genes, 2.6%	1
biological_process	nucleoside triphosphate metabolic process	8 out of 525 genes, 1.5%	281 out of 10716 genes, 2.6%	1
biological_process	response to metal ion	7 out of 525 genes, 1.3%	255 out of 10716 genes, 2.4%	1
biological_process	alpha-amino acid metabolic process	4 out of 525 genes, 0.8%	170 out of 10716 genes, 1.6%	1
biological_process	regulation of biological process	33 out of 525 genes, 6.3%	897 out of 10716 genes, 8.4%	1
biological_process	generation of precursor metabolites and energy	5 out of 525 genes, 1.0%	202 out of 10716 genes, 1.9%	1
biological_process	macromolecule biosynthetic process	36 out of 525 genes, 6.9%	973 out of 10716 genes, 9.1%	1
biological_process	response to oxygen-containing compound	3 out of 525 genes, 0.6%	144 out of 10716 genes, 1.3%	1
biological_process	organic substance catabolic process	20 out of 525 genes, 3.8%	596 out of 10716 genes, 5.6%	1
biological_process	response to chemical stimulus	31 out of 525 genes, 5.9%	862 out of 10716 genes, 8.0%	1
biological_process	catabolic process	21 out of 525 genes, 4.0%	625 out of 10716 genes, 5.8%	1
biological_process	signal transduction	14 out of 525 genes, 2.7%	459 out of 10716 genes, 4.3%	1
biological_process	single organism signaling	14 out of 525 genes, 2.7%	459 out of 10716 genes, 4.3%	1
biological_process	protein modification by small protein conjugation	2 out of 525 genes, 0.4%	119 out of 10716 genes, 1.1%	1
biological_process	regulation of metabolic process	8 out of 525 genes, 1.5%	302 out of 10716 genes, 2.8%	1
biological_process	single-organism process	125 out of 525 genes, 23.8%	2972 out of 10716 genes, 27.7%	1
biological_process	modification-dependent protein catabolic process	3 out of 525 genes, 0.6%	160 out of 10716 genes, 1.5%	1
biological_process	modification-dependent macromolecule catabolic process	3 out of 525 genes, 0.6%	160 out of 10716 genes, 1.5%	1
biological_process	cell cycle	2 out of 525 genes, 0.4%	126 out of 10716 genes, 1.2%	1
biological_process	oxidation-reduction process	2 out of 525 genes, 0.4%	127 out of 10716 genes, 1.2%	1
biological_process	proteolysis involved in cellular protein catabolic process	3 out of 525 genes, 0.6%	163 out of 10716 genes, 1.5%	1
biological_process	signaling	18 out of 525 genes, 3.4%	579 out of 10716 genes, 5.4%	1
biological_process	cofactor metabolic process	3 out of 525 genes, 0.6%	164 out of 10716 genes, 1.5%	1
biological_process	cellular macromolecule biosynthetic process	33 out of 525 genes, 6.3%	949 out of 10716 genes, 8.9%	1
biological_process	cell communication	16 out of 525 genes, 3.0%	531 out of 10716 genes, 5.0%	1
biological_process	proteolysis	3 out of 525 genes, 0.6%	168 out of 10716 genes, 1.6%	1
biological_process	protein catabolic process	3 out of 525 genes, 0.6%	168 out of 10716 genes, 1.6%	1
biological_process	cellular protein catabolic process	3 out of 525 genes, 0.6%	168 out of 10716 genes, 1.6%	1
biological_process	small molecule metabolic process	56 out of 525 genes, 10.7%	1493 out of 10716 genes, 13.9%	1
biological_process	cellular localization	5 out of 525 genes, 1.0%	236 out of 10716 genes, 2.2%	1
biological_process	DNA metabolic process	9 out of 525 genes, 1.7%	353 out of 10716 genes, 3.3%	1
biological_process	single-organism metabolic process	73 out of 525 genes, 13.9%	1888 out of 10716 genes, 17.6%	1
biological_process	nucleoside phosphate biosynthetic process	2 out of 525 genes, 0.4%	137 out of 10716 genes, 1.3%	1
biological_process	response to inorganic substance	7 out of 525 genes, 1.3%	299 out of 10716 genes, 2.8%	1
biological_process	protein modification by small protein conjugation or removal	2 out of 525 genes, 0.4%	138 out of 10716 genes, 1.3%	1
biological_process	cellular amino acid metabolic process	11 out of 525 genes, 2.1%	413 out of 10716 genes, 3.9%	1
biological_process	establishment of localization in cell	4 out of 525 genes, 0.8%	212 out of 10716 genes, 2.0%	1
biological_process	organonitrogen compound metabolic process	22 out of 525 genes, 4.2%	706 out of 10716 genes, 6.6%	1
biological_process	cellular macromolecule catabolic process	3 out of 525 genes, 0.6%	181 out of 10716 genes, 1.7%	1
biological_process	cellular response to stimulus	21 out of 525 genes, 4.0%	686 out of 10716 genes, 6.4%	1
biological_process	reproductive structure development	2 out of 525 genes, 0.4%	147 out of 10716 genes, 1.4%	1
biological_process	reproductive system development	2 out of 525 genes, 0.4%	147 out of 10716 genes, 1.4%	1
biological_process	intracellular transport	3 out of 525 genes, 0.6%	184 out of 10716 genes, 1.7%	1
biological_process	phosphorus metabolic process	24 out of 525 genes, 4.6%	767 out of 10716 genes, 7.2%	1
biological_process	organophosphate biosynthetic process	2 out of 525 genes, 0.4%	153 out of 10716 genes, 1.4%	1
biological_process	cellular catabolic process	12 out of 525 genes, 2.3%	465 out of 10716 genes, 4.3%	1
biological_process	organophosphate metabolic process	12 out of 525 genes, 2.3%	472 out of 10716 genes, 4.4%	1
biological_process	phosphate-containing compound metabolic process	22 out of 525 genes, 4.2%	747 out of 10716 genes, 7.0%	1
biological_process	nucleobase-containing small molecule metabolic process	9 out of 525 genes, 1.7%	407 out of 10716 genes, 3.8%	1
biological_process	nucleoside phosphate metabolic process	8 out of 525 genes, 1.5%	386 out of 10716 genes, 3.6%	1
biological_process	single-organism cellular process	75 out of 525 genes, 14.3%	2082 out of 10716 genes, 19.4%	1
biological_process	protein localization	3 out of 525 genes, 0.6%	234 out of 10716 genes, 2.2%	1
biological_process	RNA metabolic process	27 out of 525 genes, 5.1%	938 out of 10716 genes, 8.8%	1
biological_process	protein transport	2 out of 525 genes, 0.4%	217 out of 10716 genes, 2.0%	1
biological_process	establishment of protein localization	2 out of 525 genes, 0.4%	217 out of 10716 genes, 2.0%	1
biological_process	organelle organization	5 out of 525 genes, 1.0%	378 out of 10716 genes, 3.5%	1
biological_process	nucleic acid metabolic process	35 out of 525 genes, 6.7%	1264 out of 10716 genes, 11.8%	1
biological_process	organic cyclic compound metabolic process	64 out of 525 genes, 12.2%	2019 out of 10716 genes, 18.8%	1
biological_process	cellular aromatic compound metabolic process	61 out of 525 genes, 11.6%	1974 out of 10716 genes, 18.4%	1
biological_process	heterocycle metabolic process	53 out of 525 genes, 10.1%	1873 out of 10716 genes, 17.5%	1
biological_process	nitrogen compound metabolic process	66 out of 525 genes, 12.6%	2202 out of 10716 genes, 20.5%	1
biological_process	cellular protein modification process	22 out of 525 genes, 4.2%	1057 out of 10716 genes, 9.9%	1
biological_process	protein modification process	22 out of 525 genes, 4.2%	1057 out of 10716 genes, 9.9%	1
biological_process	nucleobase-containing compound metabolic process	44 out of 525 genes, 8.4%	1676 out of 10716 genes, 15.6%	1
biological_process	primary metabolic process	188 out of 525 genes, 35.8%	4996 out of 10716 genes, 46.6%	1
biological_process	cellular nitrogen compound metabolic process	49 out of 525 genes, 9.3%	1846 out of 10716 genes, 17.2%	1
biological_process	gene expression	34 out of 525 genes, 6.5%	1460 out of 10716 genes, 13.6%	1
biological_process	macromolecule modification	23 out of 525 genes, 4.4%	1168 out of 10716 genes, 10.9%	1
biological_process	protein metabolic process	47 out of 525 genes, 9.0%	1967 out of 10716 genes, 18.4%	1
biological_process	cellular protein metabolic process	25 out of 525 genes, 4.8%	1622 out of 10716 genes, 15.1%	1
biological_process	cellular macromolecule metabolic process	66 out of 525 genes, 12.6%	2856 out of 10716 genes, 26.7%	1
biological_process	cellular metabolic process	166 out of 525 genes, 31.6%	4986 out of 10716 genes, 46.5%	1
biological_process	cellular process	227 out of 525 genes, 43.2%	6445 out of 10716 genes, 60.1%	1
biological_process	macromolecule metabolic process	108 out of 525 genes, 20.6%	3777 out of 10716 genes, 35.2%	1
biological_process	organic substance metabolic process	185 out of 525 genes, 35.2%	5442 out of 10716 genes, 50.8%	1

## Sheet: 1Avs3A
cellular_component	Gene Ontology term	Cluster frequency	Genome frequency of use	Corrected P-value
cellular_component	external encapsulating structure	68 out of 662 genes, 10.3%	327 out of 9574 genes, 3.4%	3.82e-15
cellular_component	cell periphery	68 out of 662 genes, 10.3%	385 out of 9574 genes, 4.0%	1.93e-11
cellular_component	extracellular region	47 out of 662 genes, 7.1%	250 out of 9574 genes, 2.6%	1.25e-08
cellular_component	cell wall	27 out of 662 genes, 4.1%	139 out of 9574 genes, 1.5%	5.04e-05
cellular_component	intrinsic to membrane	119 out of 662 genes, 18.0%	1133 out of 9574 genes, 11.8%	7.08e-05
cellular_component	anchored to membrane	8 out of 662 genes, 1.2%	33 out of 9574 genes, 0.3%	0.09748
cellular_component	membrane part	122 out of 662 genes, 18.4%	1391 out of 9574 genes, 14.5%	0.15951
cellular_component	membrane	221 out of 662 genes, 33.4%	2752 out of 9574 genes, 28.7%	0.25913
cellular_component	extracellular matrix	2 out of 662 genes, 0.3%	7 out of 9574 genes, 0.1%	1
cellular_component	cytoplasmic vesicle	37 out of 662 genes, 5.6%	433 out of 9574 genes, 4.5%	1
cellular_component	vesicle	37 out of 662 genes, 5.6%	438 out of 9574 genes, 4.6%	1
cellular_component	cytoskeleton	14 out of 662 genes, 2.1%	174 out of 9574 genes, 1.8%	1
cellular_component	extracellular region part	2 out of 662 genes, 0.3%	19 out of 9574 genes, 0.2%	1
cellular_component	microtubule cytoskeleton	9 out of 662 genes, 1.4%	118 out of 9574 genes, 1.2%	1
cellular_component	plant-type vacuole	3 out of 662 genes, 0.5%	44 out of 9574 genes, 0.5%	1
cellular_component	plastid inner membrane	2 out of 662 genes, 0.3%	37 out of 9574 genes, 0.4%	1
cellular_component	vacuole	4 out of 662 genes, 0.6%	74 out of 9574 genes, 0.8%	1
cellular_component	actin cytoskeleton	2 out of 662 genes, 0.3%	39 out of 9574 genes, 0.4%	1
cellular_component	chromatin	2 out of 662 genes, 0.3%	48 out of 9574 genes, 0.5%	1
cellular_component	integral to membrane	2 out of 662 genes, 0.3%	49 out of 9574 genes, 0.5%	1
cellular_component	plastid membrane	2 out of 662 genes, 0.3%	59 out of 9574 genes, 0.6%	1
cellular_component	microbody	6 out of 662 genes, 0.9%	139 out of 9574 genes, 1.5%	1
cellular_component	mitochondrial inner membrane	2 out of 662 genes, 0.3%	62 out of 9574 genes, 0.6%	1
cellular_component	organelle inner membrane	8 out of 662 genes, 1.2%	186 out of 9574 genes, 1.9%	1
cellular_component	chromosomal part	3 out of 662 genes, 0.5%	98 out of 9574 genes, 1.0%	1
cellular_component	mitochondrial membrane	2 out of 662 genes, 0.3%	77 out of 9574 genes, 0.8%	1
cellular_component	mitochondrial envelope	2 out of 662 genes, 0.3%	88 out of 9574 genes, 0.9%	1
cellular_component	chromosome	4 out of 662 genes, 0.6%	138 out of 9574 genes, 1.4%	1
cellular_component	non-membrane-bounded organelle	19 out of 662 genes, 2.9%	449 out of 9574 genes, 4.7%	1
cellular_component	intracellular non-membrane-bounded organelle	19 out of 662 genes, 2.9%	449 out of 9574 genes, 4.7%	1
cellular_component	mitochondrial part	2 out of 662 genes, 0.3%	124 out of 9574 genes, 1.3%	1
cellular_component	mitochondrion	2 out of 662 genes, 0.3%	130 out of 9574 genes, 1.4%	1
cellular_component	plastid thylakoid	8 out of 662 genes, 1.2%	284 out of 9574 genes, 3.0%	1
cellular_component	organelle subcompartment	8 out of 662 genes, 1.2%	284 out of 9574 genes, 3.0%	1
cellular_component	organelle membrane	24 out of 662 genes, 3.6%	608 out of 9574 genes, 6.4%	1
cellular_component	chloroplast thylakoid	7 out of 662 genes, 1.1%	266 out of 9574 genes, 2.8%	1
cellular_component	plastid envelope	11 out of 662 genes, 1.7%	355 out of 9574 genes, 3.7%	1
cellular_component	chloroplast part	8 out of 662 genes, 1.2%	308 out of 9574 genes, 3.2%	1
cellular_component	plastid stroma	10 out of 662 genes, 1.5%	366 out of 9574 genes, 3.8%	1
cellular_component	chloroplast	8 out of 662 genes, 1.2%	321 out of 9574 genes, 3.4%	1
cellular_component	thylakoid	8 out of 662 genes, 1.2%	323 out of 9574 genes, 3.4%	1
cellular_component	nuclear lumen	4 out of 662 genes, 0.6%	233 out of 9574 genes, 2.4%	1
cellular_component	organelle lumen	4 out of 662 genes, 0.6%	233 out of 9574 genes, 2.4%	1
cellular_component	intracellular organelle lumen	4 out of 662 genes, 0.6%	233 out of 9574 genes, 2.4%	1
cellular_component	membrane-enclosed lumen	4 out of 662 genes, 0.6%	239 out of 9574 genes, 2.5%	1
cellular_component	organelle envelope	17 out of 662 genes, 2.6%	563 out of 9574 genes, 5.9%	1
cellular_component	envelope	17 out of 662 genes, 2.6%	571 out of 9574 genes, 6.0%	1
cellular_component	nucleus	5 out of 662 genes, 0.8%	296 out of 9574 genes, 3.1%	1
cellular_component	nuclear part	4 out of 662 genes, 0.6%	279 out of 9574 genes, 2.9%	1
cellular_component	plastid part	25 out of 662 genes, 3.8%	787 out of 9574 genes, 8.2%	1
cellular_component	protein complex	20 out of 662 genes, 3.0%	753 out of 9574 genes, 7.9%	1
cellular_component	intracellular	328 out of 662 genes, 49.5%	6756 out of 9574 genes, 70.6%	1
cellular_component	cell	476 out of 662 genes, 71.9%	7912 out of 9574 genes, 82.6%	1
cellular_component	cytoplasm	133 out of 662 genes, 20.1%	3024 out of 9574 genes, 31.6%	1
cellular_component	plastid	66 out of 662 genes, 10.0%	1831 out of 9574 genes, 19.1%	1
cellular_component	ribonucleoprotein complex	2 out of 662 genes, 0.3%	403 out of 9574 genes, 4.2%	1
cellular_component	macromolecular complex	27 out of 662 genes, 4.1%	1215 out of 9574 genes, 12.7%	1
cellular_component	organelle	308 out of 662 genes, 46.5%	5962 out of 9574 genes, 62.3%	1
cellular_component	membrane-bounded organelle	263 out of 662 genes, 39.7%	5407 out of 9574 genes, 56.5%	1
cellular_component	intracellular organelle	298 out of 662 genes, 45.0%	5874 out of 9574 genes, 61.4%	1
cellular_component	intracellular membrane-bounded organelle	251 out of 662 genes, 37.9%	5273 out of 9574 genes, 55.1%	1
cellular_component	organelle part	55 out of 662 genes, 8.3%	1789 out of 9574 genes, 18.7%	1
cellular_component	intracellular part	327 out of 662 genes, 49.4%	6730 out of 9574 genes, 70.3%	1
cellular_component	cytoplasmic part	133 out of 662 genes, 20.1%	3016 out of 9574 genes, 31.5%	1
cellular_component	intracellular organelle part	39 out of 662 genes, 5.9%	1552 out of 9574 genes, 16.2%	1
cellular_component	cell part	476 out of 662 genes, 71.9%	7912 out of 9574 genes, 82.6%	1
molecular_function	iron ion binding	87 out of 1183 genes, 7.4%	388 out of 12888 genes, 3.0%	3.28e-13
molecular_function	catalytic activity	914 out of 1183 genes, 77.3%	8776 out of 12888 genes, 68.1%	4.32e-11
molecular_function	transferase activity, transferring hexosyl groups	62 out of 1183 genes, 5.2%	290 out of 12888 genes, 2.3%	3.59e-08
molecular_function	transferase activity, transferring glycosyl groups	87 out of 1183 genes, 7.4%	476 out of 12888 genes, 3.7%	4.85e-08
molecular_function	hydrolase activity, acting on glycosyl bonds	80 out of 1183 genes, 6.8%	452 out of 12888 genes, 3.5%	1.23e-06
molecular_function	monooxygenase activity	45 out of 1183 genes, 3.8%	212 out of 12888 genes, 1.6%	1.47e-05
molecular_function	oxidoreductase activity	218 out of 1183 genes, 18.4%	1713 out of 12888 genes, 13.3%	2.21e-05
molecular_function	oxidoreductase activity, acting on paired donors, with incorporation or reduction of molecular oxygen	45 out of 1183 genes, 3.8%	236 out of 12888 genes, 1.8%	0.00036
molecular_function	carboxylesterase activity	29 out of 1183 genes, 2.5%	139 out of 12888 genes, 1.1%	0.0044
molecular_function	carboxylic ester hydrolase activity	29 out of 1183 genes, 2.5%	141 out of 12888 genes, 1.1%	0.00584
molecular_function	antioxidant activity	27 out of 1183 genes, 2.3%	135 out of 12888 genes, 1.0%	0.01819
molecular_function	oxidoreductase activity, acting on paired donors, with incorporation or reduction of molecular oxygen, NAD(P)H as one donor, and incorporation of one atom of oxygen	21 out of 1183 genes, 1.8%	95 out of 12888 genes, 0.7%	0.02512
molecular_function	transition metal ion binding	181 out of 1183 genes, 15.3%	1554 out of 12888 genes, 12.1%	0.06266
molecular_function	cellulose synthase activity	11 out of 1183 genes, 0.9%	37 out of 12888 genes, 0.3%	0.07467
molecular_function	carboxypeptidase activity	13 out of 1183 genes, 1.1%	51 out of 12888 genes, 0.4%	0.11773
molecular_function	hydrolase activity	299 out of 1183 genes, 25.3%	2778 out of 12888 genes, 21.6%	0.16383
molecular_function	glucosyltransferase activity	23 out of 1183 genes, 1.9%	124 out of 12888 genes, 1.0%	0.18206
molecular_function	secondary active transmembrane transporter activity	24 out of 1183 genes, 2.0%	134 out of 12888 genes, 1.0%	0.23703
molecular_function	oxidoreductase activity, acting on single donors with incorporation of molecular oxygen	18 out of 1183 genes, 1.5%	94 out of 12888 genes, 0.7%	0.44539
molecular_function	hydrolase activity, hydrolyzing O-glycosyl compounds	44 out of 1183 genes, 3.7%	320 out of 12888 genes, 2.5%	0.94162
molecular_function	metal ion binding	233 out of 1183 genes, 19.7%	2182 out of 12888 genes, 16.9%	1
molecular_function	dioxygenase activity	19 out of 1183 genes, 1.6%	111 out of 12888 genes, 0.9%	1
molecular_function	ion binding	277 out of 1183 genes, 23.4%	2643 out of 12888 genes, 20.5%	1
molecular_function	oxidoreductase activity, oxidizing metal ions, oxygen as acceptor	3 out of 1183 genes, 0.3%	5 out of 12888 genes, 0.0%	1
molecular_function	oxidoreductase activity, acting on paired donors, with incorporation or reduction of molecular oxygen, 2-oxoglutarate as one donor, and incorporation of one atom each of oxygen into both donors	15 out of 1183 genes, 1.3%	82 out of 12888 genes, 0.6%	1
molecular_function	cation binding	253 out of 1183 genes, 21.4%	2443 out of 12888 genes, 19.0%	1
molecular_function	polysaccharide binding	5 out of 1183 genes, 0.4%	17 out of 12888 genes, 0.1%	1
molecular_function	transferase activity, transferring acyl groups	36 out of 1183 genes, 3.0%	276 out of 12888 genes, 2.1%	1
molecular_function	oxidoreductase activity, oxidizing metal ions	3 out of 1183 genes, 0.3%	7 out of 12888 genes, 0.1%	1
molecular_function	active transmembrane transporter activity	42 out of 1183 genes, 3.6%	338 out of 12888 genes, 2.6%	1
molecular_function	pattern binding	5 out of 1183 genes, 0.4%	20 out of 12888 genes, 0.2%	1
molecular_function	nucleic acid binding transcription factor activity	43 out of 1183 genes, 3.6%	352 out of 12888 genes, 2.7%	1
molecular_function	exopeptidase activity	15 out of 1183 genes, 1.3%	98 out of 12888 genes, 0.8%	1
molecular_function	acylglycerol O-acyltransferase activity	4 out of 1183 genes, 0.3%	15 out of 12888 genes, 0.1%	1
molecular_function	oxidoreductase activity, acting on single donors with incorporation of molecular oxygen, incorporation of one atom of oxygen (internal monooxygenases or internal mixed function oxidases)	4 out of 1183 genes, 0.3%	15 out of 12888 genes, 0.1%	1
molecular_function	water transmembrane transporter activity	3 out of 1183 genes, 0.3%	9 out of 12888 genes, 0.1%	1
molecular_function	transferase activity	304 out of 1183 genes, 25.7%	3047 out of 12888 genes, 23.6%	1
molecular_function	oxidoreductase activity, acting on paired donors, with incorporation or reduction of molecular oxygen, reduced iron-sulfur protein as one donor, and incorporation of one atom of oxygen	2 out of 1183 genes, 0.2%	4 out of 12888 genes, 0.0%	1
molecular_function	peptidase activity	53 out of 1183 genes, 4.5%	464 out of 12888 genes, 3.6%	1
molecular_function	oxidoreductase activity, acting on paired donors, with incorporation or reduction of molecular oxygen, reduced flavin or flavoprotein as one donor, and incorporation of one atom of oxygen	4 out of 1183 genes, 0.3%	17 out of 12888 genes, 0.1%	1
molecular_function	anion transmembrane transporter activity	10 out of 1183 genes, 0.8%	64 out of 12888 genes, 0.5%	1
molecular_function	amine transmembrane transporter activity	6 out of 1183 genes, 0.5%	32 out of 12888 genes, 0.2%	1
molecular_function	alkylbase DNA N-glycosylase activity	2 out of 1183 genes, 0.2%	5 out of 12888 genes, 0.0%	1
molecular_function	oxidoreductase activity, acting on NAD(P)H, oxygen as acceptor	3 out of 1183 genes, 0.3%	11 out of 12888 genes, 0.1%	1
molecular_function	oxidoreductase activity, acting on diphenols and related substances as donors, oxygen as acceptor	11 out of 1183 genes, 0.9%	76 out of 12888 genes, 0.6%	1
molecular_function	enzyme regulator activity	18 out of 1183 genes, 1.5%	140 out of 12888 genes, 1.1%	1
molecular_function	peroxidase activity	4 out of 1183 genes, 0.3%	19 out of 12888 genes, 0.1%	1
molecular_function	oxidoreductase activity, acting on peroxide as acceptor	4 out of 1183 genes, 0.3%	19 out of 12888 genes, 0.1%	1
molecular_function	carbon-oxygen lyase activity	17 out of 1183 genes, 1.4%	131 out of 12888 genes, 1.0%	1
molecular_function	carbon-nitrogen lyase activity	5 out of 1183 genes, 0.4%	28 out of 12888 genes, 0.2%	1
molecular_function	actin binding	3 out of 1183 genes, 0.3%	13 out of 12888 genes, 0.1%	1
molecular_function	peptidase activity, acting on L-amino acid peptides	49 out of 1183 genes, 4.1%	450 out of 12888 genes, 3.5%	1
molecular_function	oxidoreductase activity, acting on the aldehyde or oxo group of donors	10 out of 1183 genes, 0.8%	72 out of 12888 genes, 0.6%	1
molecular_function	inorganic anion transmembrane transporter activity	5 out of 1183 genes, 0.4%	29 out of 12888 genes, 0.2%	1
molecular_function	carbohydrate binding	12 out of 1183 genes, 1.0%	92 out of 12888 genes, 0.7%	1
molecular_function	oxidoreductase activity, acting on diphenols and related substances as donors	11 out of 1183 genes, 0.9%	83 out of 12888 genes, 0.6%	1
molecular_function	transferase activity, transferring acyl groups other than amino-acyl groups	28 out of 1183 genes, 2.4%	246 out of 12888 genes, 1.9%	1
molecular_function	oxidoreductase activity, acting on the CH-CH group of donors, oxygen as acceptor	4 out of 1183 genes, 0.3%	22 out of 12888 genes, 0.2%	1
molecular_function	hydro-lyase activity	10 out of 1183 genes, 0.8%	74 out of 12888 genes, 0.6%	1
molecular_function	enzyme inhibitor activity	3 out of 1183 genes, 0.3%	15 out of 12888 genes, 0.1%	1
molecular_function	carbon-oxygen lyase activity, acting on polysaccharides	3 out of 1183 genes, 0.3%	15 out of 12888 genes, 0.1%	1
molecular_function	cation channel activity	6 out of 1183 genes, 0.5%	40 out of 12888 genes, 0.3%	1
molecular_function	aldehyde dehydrogenase [NAD(P)+] activity	2 out of 1183 genes, 0.2%	8 out of 12888 genes, 0.1%	1
molecular_function	CoA carboxylase activity	2 out of 1183 genes, 0.2%	8 out of 12888 genes, 0.1%	1
molecular_function	oxidoreductase activity, acting on the aldehyde or oxo group of donors, oxygen as acceptor	2 out of 1183 genes, 0.2%	8 out of 12888 genes, 0.1%	1
molecular_function	ligase activity, forming carbon-carbon bonds	2 out of 1183 genes, 0.2%	8 out of 12888 genes, 0.1%	1
molecular_function	transmembrane transporter activity	80 out of 1183 genes, 6.8%	783 out of 12888 genes, 6.1%	1
molecular_function	organic phosphonate transmembrane transporter activity	5 out of 1183 genes, 0.4%	32 out of 12888 genes, 0.2%	1
molecular_function	UDP-glucosyltransferase activity	10 out of 1183 genes, 0.8%	77 out of 12888 genes, 0.6%	1
molecular_function	carboxylic acid transmembrane transporter activity	4 out of 1183 genes, 0.3%	24 out of 12888 genes, 0.2%	1
molecular_function	oxidoreductase activity, acting on CH-OH group of donors	25 out of 1183 genes, 2.1%	224 out of 12888 genes, 1.7%	1
molecular_function	UDP-glycosyltransferase activity	20 out of 1183 genes, 1.7%	176 out of 12888 genes, 1.4%	1
molecular_function	endopeptidase activity	28 out of 1183 genes, 2.4%	256 out of 12888 genes, 2.0%	1
molecular_function	fatty acid ligase activity	2 out of 1183 genes, 0.2%	9 out of 12888 genes, 0.1%	1
molecular_function	phospholipase activity	6 out of 1183 genes, 0.5%	43 out of 12888 genes, 0.3%	1
molecular_function	aldo-keto reductase (NADP) activity	3 out of 1183 genes, 0.3%	17 out of 12888 genes, 0.1%	1
molecular_function	organic anion transmembrane transporter activity	4 out of 1183 genes, 0.3%	26 out of 12888 genes, 0.2%	1
molecular_function	amino acid transmembrane transporter activity	3 out of 1183 genes, 0.3%	18 out of 12888 genes, 0.1%	1
molecular_function	peptidase regulator activity	3 out of 1183 genes, 0.3%	18 out of 12888 genes, 0.1%	1
molecular_function	endopeptidase regulator activity	3 out of 1183 genes, 0.3%	18 out of 12888 genes, 0.1%	1
molecular_function	oxidoreductase activity, acting on the CH-NH2 group of donors, oxygen as acceptor	4 out of 1183 genes, 0.3%	27 out of 12888 genes, 0.2%	1
molecular_function	endopeptidase inhibitor activity	2 out of 1183 genes, 0.2%	10 out of 12888 genes, 0.1%	1
molecular_function	peptidase inhibitor activity	2 out of 1183 genes, 0.2%	10 out of 12888 genes, 0.1%	1
molecular_function	oxidoreductase activity, acting on the CH-OH group of donors, NAD or NADP as acceptor	20 out of 1183 genes, 1.7%	183 out of 12888 genes, 1.4%	1
molecular_function	lyase activity	38 out of 1183 genes, 3.2%	368 out of 12888 genes, 2.9%	1
molecular_function	fatty acid synthase activity	4 out of 1183 genes, 0.3%	28 out of 12888 genes, 0.2%	1
molecular_function	DNA N-glycosylase activity	2 out of 1183 genes, 0.2%	11 out of 12888 genes, 0.1%	1
molecular_function	hydrolase activity, acting on ester bonds	69 out of 1183 genes, 5.8%	698 out of 12888 genes, 5.4%	1
molecular_function	oxidoreductase activity, acting on single donors with incorporation of molecular oxygen, incorporation of two atoms of oxygen	4 out of 1183 genes, 0.3%	29 out of 12888 genes, 0.2%	1
molecular_function	lipase activity	6 out of 1183 genes, 0.5%	48 out of 12888 genes, 0.4%	1
molecular_function	identical protein binding	5 out of 1183 genes, 0.4%	39 out of 12888 genes, 0.3%	1
molecular_function	cofactor binding	43 out of 1183 genes, 3.6%	429 out of 12888 genes, 3.3%	1
molecular_function	ligase activity, forming carbon-sulfur bonds	4 out of 1183 genes, 0.3%	30 out of 12888 genes, 0.2%	1
molecular_function	coenzyme binding	16 out of 1183 genes, 1.4%	150 out of 12888 genes, 1.2%	1
molecular_function	oxidoreductase activity, acting on the CH-OH group of donors, oxygen as acceptor	2 out of 1183 genes, 0.2%	12 out of 12888 genes, 0.1%	1
molecular_function	glucosidase activity	8 out of 1183 genes, 0.7%	72 out of 12888 genes, 0.6%	1
molecular_function	galactosyltransferase activity	4 out of 1183 genes, 0.3%	33 out of 12888 genes, 0.3%	1
molecular_function	carbohydrate phosphatase activity	3 out of 1183 genes, 0.3%	24 out of 12888 genes, 0.2%	1
molecular_function	O-acyltransferase activity	4 out of 1183 genes, 0.3%	34 out of 12888 genes, 0.3%	1
molecular_function	protein kinase activity	86 out of 1183 genes, 7.3%	908 out of 12888 genes, 7.0%	1
molecular_function	oxidoreductase activity, acting on the CH-CH group of donors	28 out of 1183 genes, 2.4%	288 out of 12888 genes, 2.2%	1
molecular_function	beta-glucosidase activity	3 out of 1183 genes, 0.3%	25 out of 12888 genes, 0.2%	1
molecular_function	transition metal ion transmembrane transporter activity	3 out of 1183 genes, 0.3%	25 out of 12888 genes, 0.2%	1
molecular_function	alkali metal ion binding	2 out of 1183 genes, 0.2%	15 out of 12888 genes, 0.1%	1
molecular_function	oxidosqualene cyclase activity	2 out of 1183 genes, 0.2%	15 out of 12888 genes, 0.1%	1
molecular_function	peptide transporter activity	2 out of 1183 genes, 0.2%	16 out of 12888 genes, 0.1%	1
molecular_function	organic acid transmembrane transporter activity	4 out of 1183 genes, 0.3%	37 out of 12888 genes, 0.3%	1
molecular_function	oxidoreductase activity, acting on the CH-CH group of donors, NAD or NADP as acceptor	23 out of 1183 genes, 1.9%	240 out of 12888 genes, 1.9%	1
molecular_function	oxidoreductase activity, acting on the CH-NH2 group of donors	5 out of 1183 genes, 0.4%	48 out of 12888 genes, 0.4%	1
molecular_function	antiporter activity	3 out of 1183 genes, 0.3%	27 out of 12888 genes, 0.2%	1
molecular_function	oxidoreductase activity, acting on the CH-NH group of donors	3 out of 1183 genes, 0.3%	27 out of 12888 genes, 0.2%	1
molecular_function	hydrolase activity, acting on acid anhydrides, catalyzing transmembrane movement of substances	14 out of 1183 genes, 1.2%	145 out of 12888 genes, 1.1%	1
molecular_function	solute:hydrogen antiporter activity	2 out of 1183 genes, 0.2%	17 out of 12888 genes, 0.1%	1
molecular_function	hydrolase activity, acting on carbon-nitrogen (but not peptide) bonds, in cyclic amidines	2 out of 1183 genes, 0.2%	17 out of 12888 genes, 0.1%	1
molecular_function	transporter activity	85 out of 1183 genes, 7.2%	921 out of 12888 genes, 7.1%	1
molecular_function	hydrolase activity, hydrolyzing N-glycosyl compounds	2 out of 1183 genes, 0.2%	18 out of 12888 genes, 0.1%	1
molecular_function	galactosidase activity	4 out of 1183 genes, 0.3%	40 out of 12888 genes, 0.3%	1
molecular_function	phospholipid binding	5 out of 1183 genes, 0.4%	51 out of 12888 genes, 0.4%	1
molecular_function	racemase and epimerase activity, acting on carbohydrates and derivatives	2 out of 1183 genes, 0.2%	19 out of 12888 genes, 0.1%	1
molecular_function	phosphoric diester hydrolase activity	2 out of 1183 genes, 0.2%	20 out of 12888 genes, 0.2%	1
molecular_function	oxidoreductase activity, acting on the aldehyde or oxo group of donors, NAD or NADP as acceptor	4 out of 1183 genes, 0.3%	43 out of 12888 genes, 0.3%	1
molecular_function	phosphotransferase activity, alcohol group as acceptor	87 out of 1183 genes, 7.4%	962 out of 12888 genes, 7.5%	1
molecular_function	solute:cation antiporter activity	2 out of 1183 genes, 0.2%	21 out of 12888 genes, 0.2%	1
molecular_function	amylase activity	2 out of 1183 genes, 0.2%	21 out of 12888 genes, 0.2%	1
molecular_function	transferase activity, transferring aldehyde or ketonic groups	2 out of 1183 genes, 0.2%	21 out of 12888 genes, 0.2%	1
molecular_function	CoA-ligase activity	2 out of 1183 genes, 0.2%	22 out of 12888 genes, 0.2%	1
molecular_function	ion channel activity	6 out of 1183 genes, 0.5%	69 out of 12888 genes, 0.5%	1
molecular_function	substrate-specific channel activity	6 out of 1183 genes, 0.5%	69 out of 12888 genes, 0.5%	1
molecular_function	carboxylic acid binding	4 out of 1183 genes, 0.3%	46 out of 12888 genes, 0.4%	1
molecular_function	iron-sulfur cluster binding	5 out of 1183 genes, 0.4%	58 out of 12888 genes, 0.5%	1
molecular_function	protein tyrosine kinase activity	8 out of 1183 genes, 0.7%	93 out of 12888 genes, 0.7%	1
molecular_function	kinase activity	108 out of 1183 genes, 9.1%	1207 out of 12888 genes, 9.4%	1
molecular_function	O-methyltransferase activity	3 out of 1183 genes, 0.3%	35 out of 12888 genes, 0.3%	1
molecular_function	steroid dehydrogenase activity, acting on the CH-OH group of donors, NAD or NADP as acceptor	2 out of 1183 genes, 0.2%	23 out of 12888 genes, 0.2%	1
molecular_function	anion binding	4 out of 1183 genes, 0.3%	47 out of 12888 genes, 0.4%	1
molecular_function	ATPase activity, coupled to transmembrane movement of substances	12 out of 1183 genes, 1.0%	140 out of 12888 genes, 1.1%	1
molecular_function	channel activity	6 out of 1183 genes, 0.5%	71 out of 12888 genes, 0.6%	1
molecular_function	passive transmembrane transporter activity	6 out of 1183 genes, 0.5%	71 out of 12888 genes, 0.6%	1
molecular_function	DNA binding	28 out of 1183 genes, 2.4%	322 out of 12888 genes, 2.5%	1
molecular_function	ATPase activity, coupled to movement of substances	12 out of 1183 genes, 1.0%	141 out of 12888 genes, 1.1%	1
molecular_function	methyltransferase activity	17 out of 1183 genes, 1.4%	199 out of 12888 genes, 1.5%	1
molecular_function	protein serine/threonine kinase activity	23 out of 1183 genes, 1.9%	270 out of 12888 genes, 2.1%	1
molecular_function	steroid dehydrogenase activity	2 out of 1183 genes, 0.2%	25 out of 12888 genes, 0.2%	1
molecular_function	metal cluster binding	7 out of 1183 genes, 0.6%	89 out of 12888 genes, 0.7%	1
molecular_function	racemase and epimerase activity	2 out of 1183 genes, 0.2%	27 out of 12888 genes, 0.2%	1
molecular_function	cation-transporting ATPase activity	5 out of 1183 genes, 0.4%	65 out of 12888 genes, 0.5%	1
molecular_function	vitamin binding	3 out of 1183 genes, 0.3%	40 out of 12888 genes, 0.3%	1
molecular_function	calmodulin-dependent protein kinase activity	2 out of 1183 genes, 0.2%	28 out of 12888 genes, 0.2%	1
molecular_function	transaminase activity	4 out of 1183 genes, 0.3%	55 out of 12888 genes, 0.4%	1
molecular_function	metal ion transmembrane transporter activity	8 out of 1183 genes, 0.7%	106 out of 12888 genes, 0.8%	1
molecular_function	ion transmembrane transporter activity	34 out of 1183 genes, 2.9%	413 out of 12888 genes, 3.2%	1
molecular_function	substrate-specific transmembrane transporter activity	46 out of 1183 genes, 3.9%	552 out of 12888 genes, 4.3%	1
molecular_function	NADH dehydrogenase activity	2 out of 1183 genes, 0.2%	31 out of 12888 genes, 0.2%	1
molecular_function	ribonuclease activity	2 out of 1183 genes, 0.2%	31 out of 12888 genes, 0.2%	1
molecular_function	NADH dehydrogenase (quinone) activity	2 out of 1183 genes, 0.2%	31 out of 12888 genes, 0.2%	1
molecular_function	lipid binding	5 out of 1183 genes, 0.4%	72 out of 12888 genes, 0.6%	1
molecular_function	primary active transmembrane transporter activity	13 out of 1183 genes, 1.1%	172 out of 12888 genes, 1.3%	1
molecular_function	P-P-bond-hydrolysis-driven transmembrane transporter activity	13 out of 1183 genes, 1.1%	172 out of 12888 genes, 1.3%	1
molecular_function	ATPase activity, coupled to transmembrane movement of ions	7 out of 1183 genes, 0.6%	98 out of 12888 genes, 0.8%	1
molecular_function	S-adenosylmethionine-dependent methyltransferase activity	4 out of 1183 genes, 0.3%	60 out of 12888 genes, 0.5%	1
molecular_function	cytoskeletal protein binding	6 out of 1183 genes, 0.5%	88 out of 12888 genes, 0.7%	1
molecular_function	carbon-sulfur lyase activity	4 out of 1183 genes, 0.3%	62 out of 12888 genes, 0.5%	1
molecular_function	transferase activity, transferring alkyl or aryl (other than methyl) groups	6 out of 1183 genes, 0.5%	89 out of 12888 genes, 0.7%	1
molecular_function	N-acyltransferase activity	3 out of 1183 genes, 0.3%	49 out of 12888 genes, 0.4%	1
molecular_function	transferase activity, transferring nitrogenous groups	4 out of 1183 genes, 0.3%	63 out of 12888 genes, 0.5%	1
molecular_function	transferase activity, transferring pentosyl groups	2 out of 1183 genes, 0.2%	35 out of 12888 genes, 0.3%	1
molecular_function	intramolecular transferase activity	4 out of 1183 genes, 0.3%	66 out of 12888 genes, 0.5%	1
molecular_function	oxidoreductase activity, acting on NAD(P)H	6 out of 1183 genes, 0.5%	94 out of 12888 genes, 0.7%	1
molecular_function	hydrogen ion transmembrane transporter activity	4 out of 1183 genes, 0.3%	67 out of 12888 genes, 0.5%	1
molecular_function	receptor signaling protein serine/threonine kinase activity	5 out of 1183 genes, 0.4%	82 out of 12888 genes, 0.6%	1
molecular_function	receptor signaling protein activity	5 out of 1183 genes, 0.4%	82 out of 12888 genes, 0.6%	1
molecular_function	carbon-carbon lyase activity	7 out of 1183 genes, 0.6%	111 out of 12888 genes, 0.9%	1
molecular_function	carboxy-lyase activity	4 out of 1183 genes, 0.3%	70 out of 12888 genes, 0.5%	1
molecular_function	structure-specific DNA binding	2 out of 1183 genes, 0.2%	41 out of 12888 genes, 0.3%	1
molecular_function	phosphoric ester hydrolase activity	23 out of 1183 genes, 1.9%	319 out of 12888 genes, 2.5%	1
molecular_function	phosphatase activity	19 out of 1183 genes, 1.6%	280 out of 12888 genes, 2.2%	1
molecular_function	substrate-specific transporter activity	49 out of 1183 genes, 4.1%	652 out of 12888 genes, 5.1%	1
molecular_function	acid-amino acid ligase activity	7 out of 1183 genes, 0.6%	128 out of 12888 genes, 1.0%	1
molecular_function	oxidoreductase activity, acting on NAD(P)H, quinone or similar compound as acceptor	2 out of 1183 genes, 0.2%	52 out of 12888 genes, 0.4%	1
molecular_function	isomerase activity	16 out of 1183 genes, 1.4%	254 out of 12888 genes, 2.0%	1
molecular_function	cation transmembrane transporter activity	18 out of 1183 genes, 1.5%	281 out of 12888 genes, 2.2%	1
molecular_function	small conjugating protein ligase activity	5 out of 1183 genes, 0.4%	106 out of 12888 genes, 0.8%	1
molecular_function	acetyltransferase activity	3 out of 1183 genes, 0.3%	75 out of 12888 genes, 0.6%	1
molecular_function	motor activity	3 out of 1183 genes, 0.3%	76 out of 12888 genes, 0.6%	1
molecular_function	signal transducer activity	15 out of 1183 genes, 1.3%	255 out of 12888 genes, 2.0%	1
molecular_function	hydrolase activity, acting on carbon-nitrogen (but not peptide) bonds	3 out of 1183 genes, 0.3%	81 out of 12888 genes, 0.6%	1
molecular_function	enzyme binding	2 out of 1183 genes, 0.2%	63 out of 12888 genes, 0.5%	1
molecular_function	transferase activity, transferring one-carbon groups	20 out of 1183 genes, 1.7%	328 out of 12888 genes, 2.5%	1
molecular_function	transferase activity, transferring phosphorus-containing groups	118 out of 1183 genes, 10.0%	1527 out of 12888 genes, 11.8%	1
molecular_function	molecular transducer activity	17 out of 1183 genes, 1.4%	298 out of 12888 genes, 2.3%	1
molecular_function	monovalent inorganic cation transmembrane transporter activity	5 out of 1183 genes, 0.4%	135 out of 12888 genes, 1.0%	1
molecular_function	inorganic cation transmembrane transporter activity	7 out of 1183 genes, 0.6%	169 out of 12888 genes, 1.3%	1
molecular_function	phosphoprotein phosphatase activity	4 out of 1183 genes, 0.3%	122 out of 12888 genes, 0.9%	1
molecular_function	ligase activity, forming carbon-nitrogen bonds	9 out of 1183 genes, 0.8%	206 out of 12888 genes, 1.6%	1
molecular_function	nuclease activity	3 out of 1183 genes, 0.3%	111 out of 12888 genes, 0.9%	1
molecular_function	oxidoreductase activity, acting on a sulfur group of donors	2 out of 1183 genes, 0.2%	91 out of 12888 genes, 0.7%	1
molecular_function	hydrolase activity, acting on acid anhydrides	53 out of 1183 genes, 4.5%	839 out of 12888 genes, 6.5%	1
molecular_function	pyrophosphatase activity	51 out of 1183 genes, 4.3%	824 out of 12888 genes, 6.4%	1
molecular_function	hydrolase activity, acting on acid anhydrides, in phosphorus-containing anhydrides	51 out of 1183 genes, 4.3%	828 out of 12888 genes, 6.4%	1
molecular_function	ATPase activity	15 out of 1183 genes, 1.3%	331 out of 12888 genes, 2.6%	1
molecular_function	guanyl nucleotide binding	8 out of 1183 genes, 0.7%	221 out of 12888 genes, 1.7%	1
molecular_function	guanyl ribonucleotide binding	8 out of 1183 genes, 0.7%	221 out of 12888 genes, 1.7%	1
molecular_function	nucleoside-triphosphatase activity	44 out of 1183 genes, 3.7%	751 out of 12888 genes, 5.8%	1
molecular_function	ATPase activity, coupled	13 out of 1183 genes, 1.1%	311 out of 12888 genes, 2.4%	1
molecular_function	ligase activity	16 out of 1183 genes, 1.4%	360 out of 12888 genes, 2.8%	1
molecular_function	nucleotidyltransferase activity	3 out of 1183 genes, 0.3%	161 out of 12888 genes, 1.2%	1
molecular_function	protein binding	39 out of 1183 genes, 3.3%	757 out of 12888 genes, 5.9%	1
molecular_function	nucleic acid binding	86 out of 1183 genes, 7.3%	1465 out of 12888 genes, 11.4%	1
molecular_function	adenyl ribonucleotide binding	93 out of 1183 genes, 7.9%	1606 out of 12888 genes, 12.5%	1
molecular_function	adenyl nucleotide binding	93 out of 1183 genes, 7.9%	1607 out of 12888 genes, 12.5%	1
molecular_function	nucleotide binding	145 out of 1183 genes, 12.3%	2333 out of 12888 genes, 18.1%	1
molecular_function	nucleoside phosphate binding	145 out of 1183 genes, 12.3%	2333 out of 12888 genes, 18.1%	1
molecular_function	small molecule binding	148 out of 1183 genes, 12.5%	2393 out of 12888 genes, 18.6%	1
molecular_function	structural molecule activity	4 out of 1183 genes, 0.3%	298 out of 12888 genes, 2.3%	1
molecular_function	RNA binding	2 out of 1183 genes, 0.2%	254 out of 12888 genes, 2.0%	1
molecular_function	ribonucleotide binding	101 out of 1183 genes, 8.5%	1819 out of 12888 genes, 14.1%	1
molecular_function	purine ribonucleotide binding	101 out of 1183 genes, 8.5%	1819 out of 12888 genes, 14.1%	1
molecular_function	purine nucleotide binding	101 out of 1183 genes, 8.5%	1820 out of 12888 genes, 14.1%	1
molecular_function	binding	608 out of 1183 genes, 51.4%	7740 out of 12888 genes, 60.1%	1
molecular_function	heterocyclic compound binding	229 out of 1183 genes, 19.4%	3652 out of 12888 genes, 28.3%	1
molecular_function	organic cyclic compound binding	229 out of 1183 genes, 19.4%	3655 out of 12888 genes, 28.4%	1
biological_process	polysaccharide metabolic process	46 out of 953 genes, 4.8%	194 out of 10716 genes, 1.8%	1.83e-07
biological_process	glucan metabolic process	37 out of 953 genes, 3.9%	143 out of 10716 genes, 1.3%	7.49e-07
biological_process	external encapsulating structure organization	39 out of 953 genes, 4.1%	158 out of 10716 genes, 1.5%	1.18e-06
biological_process	cell wall organization	18 out of 953 genes, 1.9%	64 out of 10716 genes, 0.6%	0.00336
biological_process	cell wall organization or biogenesis	23 out of 953 genes, 2.4%	99 out of 10716 genes, 0.9%	0.00651
biological_process	carbohydrate metabolic process	67 out of 953 genes, 7.0%	470 out of 10716 genes, 4.4%	0.02963
biological_process	L-phenylalanine metabolic process	7 out of 953 genes, 0.7%	15 out of 10716 genes, 0.1%	0.06843
biological_process	aromatic amino acid family metabolic process	10 out of 953 genes, 1.0%	34 out of 10716 genes, 0.3%	0.24962
biological_process	programmed cell death	14 out of 953 genes, 1.5%	61 out of 10716 genes, 0.6%	0.34956
biological_process	alditol phosphate metabolic process	4 out of 953 genes, 0.4%	6 out of 10716 genes, 0.1%	0.37699
biological_process	cell death	14 out of 953 genes, 1.5%	65 out of 10716 genes, 0.6%	0.67791
biological_process	death	14 out of 953 genes, 1.5%	65 out of 10716 genes, 0.6%	0.67791
biological_process	drug transport	11 out of 953 genes, 1.2%	47 out of 10716 genes, 0.4%	1
biological_process	response to drug	11 out of 953 genes, 1.2%	47 out of 10716 genes, 0.4%	1
biological_process	glucan biosynthetic process	12 out of 953 genes, 1.3%	54 out of 10716 genes, 0.5%	1
biological_process	glycerol-3-phosphate metabolic process	3 out of 953 genes, 0.3%	4 out of 10716 genes, 0.0%	1
biological_process	cellular metal ion homeostasis	6 out of 953 genes, 0.6%	18 out of 10716 genes, 0.2%	1
biological_process	transition metal ion transport	12 out of 953 genes, 1.3%	58 out of 10716 genes, 0.5%	1
biological_process	plant-type cell wall organization or biogenesis	8 out of 953 genes, 0.8%	31 out of 10716 genes, 0.3%	1
biological_process	cellular biogenic amine metabolic process	9 out of 953 genes, 0.9%	39 out of 10716 genes, 0.4%	1
biological_process	metal ion homeostasis	6 out of 953 genes, 0.6%	20 out of 10716 genes, 0.2%	1
biological_process	cellular carbohydrate biosynthetic process	13 out of 953 genes, 1.4%	69 out of 10716 genes, 0.6%	1
biological_process	secondary metabolic process	25 out of 953 genes, 2.6%	168 out of 10716 genes, 1.6%	1
biological_process	cellular amine metabolic process	9 out of 953 genes, 0.9%	40 out of 10716 genes, 0.4%	1
biological_process	plant-type cell wall modification	5 out of 953 genes, 0.5%	15 out of 10716 genes, 0.1%	1
biological_process	trichoblast fate specification	2 out of 953 genes, 0.2%	2 out of 10716 genes, 0.0%	1
biological_process	fluid transport	2 out of 953 genes, 0.2%	2 out of 10716 genes, 0.0%	1
biological_process	carbohydrate biosynthetic process	14 out of 953 genes, 1.5%	78 out of 10716 genes, 0.7%	1
biological_process	fatty acid biosynthetic process	10 out of 953 genes, 1.0%	49 out of 10716 genes, 0.5%	1
biological_process	amine metabolic process	10 out of 953 genes, 1.0%	49 out of 10716 genes, 0.5%	1
biological_process	polysaccharide biosynthetic process	13 out of 953 genes, 1.4%	73 out of 10716 genes, 0.7%	1
biological_process	oligosaccharide metabolic process	9 out of 953 genes, 0.9%	43 out of 10716 genes, 0.4%	1
biological_process	cellular polysaccharide biosynthetic process	12 out of 953 genes, 1.3%	67 out of 10716 genes, 0.6%	1
biological_process	lipid localization	10 out of 953 genes, 1.0%	52 out of 10716 genes, 0.5%	1
biological_process	alcohol metabolic process	11 out of 953 genes, 1.2%	60 out of 10716 genes, 0.6%	1
biological_process	organic hydroxy compound metabolic process	11 out of 953 genes, 1.2%	60 out of 10716 genes, 0.6%	1
biological_process	monocarboxylic acid biosynthetic process	10 out of 953 genes, 1.0%	53 out of 10716 genes, 0.5%	1
biological_process	lipid biosynthetic process	19 out of 953 genes, 2.0%	128 out of 10716 genes, 1.2%	1
biological_process	phenylpropanoid metabolic process	21 out of 953 genes, 2.2%	146 out of 10716 genes, 1.4%	1
biological_process	leaf morphogenesis	3 out of 953 genes, 0.3%	7 out of 10716 genes, 0.1%	1
biological_process	cell wall modification	6 out of 953 genes, 0.6%	25 out of 10716 genes, 0.2%	1
biological_process	amine transport	4 out of 953 genes, 0.4%	13 out of 10716 genes, 0.1%	1
biological_process	cellular carbohydrate metabolic process	24 out of 953 genes, 2.5%	179 out of 10716 genes, 1.7%	1
biological_process	plant-type cell wall organization	5 out of 953 genes, 0.5%	20 out of 10716 genes, 0.2%	1
biological_process	phosphatidylcholine metabolic process	3 out of 953 genes, 0.3%	8 out of 10716 genes, 0.1%	1
biological_process	single-organism biosynthetic process	37 out of 953 genes, 3.9%	302 out of 10716 genes, 2.8%	1
biological_process	ion transport	51 out of 953 genes, 5.4%	439 out of 10716 genes, 4.1%	1
biological_process	disaccharide metabolic process	8 out of 953 genes, 0.8%	42 out of 10716 genes, 0.4%	1
biological_process	lipid metabolic process	51 out of 953 genes, 5.4%	441 out of 10716 genes, 4.1%	1
biological_process	response to reactive oxygen species	5 out of 953 genes, 0.5%	21 out of 10716 genes, 0.2%	1
biological_process	aminoglycan catabolic process	5 out of 953 genes, 0.5%	21 out of 10716 genes, 0.2%	1
biological_process	ethanolamine-containing compound metabolic process	3 out of 953 genes, 0.3%	9 out of 10716 genes, 0.1%	1
biological_process	leaf development	3 out of 953 genes, 0.3%	9 out of 10716 genes, 0.1%	1
biological_process	carbohydrate derivative catabolic process	6 out of 953 genes, 0.6%	29 out of 10716 genes, 0.3%	1
biological_process	metal ion transport	22 out of 953 genes, 2.3%	169 out of 10716 genes, 1.6%	1
biological_process	sesquiterpenoid metabolic process	3 out of 953 genes, 0.3%	10 out of 10716 genes, 0.1%	1
biological_process	aminoglycan metabolic process	5 out of 953 genes, 0.5%	24 out of 10716 genes, 0.2%	1
biological_process	fatty acid metabolic process	23 out of 953 genes, 2.4%	183 out of 10716 genes, 1.7%	1
biological_process	shoot system morphogenesis	4 out of 953 genes, 0.4%	17 out of 10716 genes, 0.2%	1
biological_process	response to endogenous stimulus	48 out of 953 genes, 5.0%	430 out of 10716 genes, 4.0%	1
biological_process	phenylpropanoid biosynthetic process	13 out of 953 genes, 1.4%	92 out of 10716 genes, 0.9%	1
biological_process	phosphatidylcholine biosynthetic process	2 out of 953 genes, 0.2%	5 out of 10716 genes, 0.0%	1
biological_process	gibberellin metabolic process	2 out of 953 genes, 0.2%	5 out of 10716 genes, 0.0%	1
biological_process	polysaccharide catabolic process	4 out of 953 genes, 0.4%	18 out of 10716 genes, 0.2%	1
biological_process	stomatal movement	4 out of 953 genes, 0.4%	18 out of 10716 genes, 0.2%	1
biological_process	response to organic substance	55 out of 953 genes, 5.8%	508 out of 10716 genes, 4.7%	1
biological_process	inorganic anion transport	8 out of 953 genes, 0.8%	50 out of 10716 genes, 0.5%	1
biological_process	hormone-mediated signaling pathway	19 out of 953 genes, 2.0%	151 out of 10716 genes, 1.4%	1
biological_process	cellular response to hormone stimulus	19 out of 953 genes, 2.0%	151 out of 10716 genes, 1.4%	1
biological_process	cellular response to endogenous stimulus	19 out of 953 genes, 2.0%	151 out of 10716 genes, 1.4%	1
biological_process	trehalose metabolic process	4 out of 953 genes, 0.4%	19 out of 10716 genes, 0.2%	1
biological_process	secondary metabolite biosynthetic process	13 out of 953 genes, 1.4%	96 out of 10716 genes, 0.9%	1
biological_process	monocarboxylic acid metabolic process	29 out of 953 genes, 3.0%	250 out of 10716 genes, 2.3%	1
biological_process	tryptophan metabolic process	3 out of 953 genes, 0.3%	12 out of 10716 genes, 0.1%	1
biological_process	indolalkylamine metabolic process	3 out of 953 genes, 0.3%	12 out of 10716 genes, 0.1%	1
biological_process	zinc ion transport	3 out of 953 genes, 0.3%	12 out of 10716 genes, 0.1%	1
biological_process	plant-type cell wall biogenesis	3 out of 953 genes, 0.3%	12 out of 10716 genes, 0.1%	1
biological_process	pollen wall assembly	3 out of 953 genes, 0.3%	12 out of 10716 genes, 0.1%	1
biological_process	cellular component assembly involved in morphogenesis	3 out of 953 genes, 0.3%	12 out of 10716 genes, 0.1%	1
biological_process	cellular cation homeostasis	7 out of 953 genes, 0.7%	44 out of 10716 genes, 0.4%	1
biological_process	cell fate specification	2 out of 953 genes, 0.2%	6 out of 10716 genes, 0.1%	1
biological_process	toxin metabolic process	2 out of 953 genes, 0.2%	6 out of 10716 genes, 0.1%	1
biological_process	hemicellulose metabolic process	2 out of 953 genes, 0.2%	6 out of 10716 genes, 0.1%	1
biological_process	glucuronoxylan metabolic process	2 out of 953 genes, 0.2%	6 out of 10716 genes, 0.1%	1
biological_process	xylan metabolic process	2 out of 953 genes, 0.2%	6 out of 10716 genes, 0.1%	1
biological_process	response to hormone stimulus	44 out of 953 genes, 4.6%	405 out of 10716 genes, 3.8%	1
biological_process	cation transport	32 out of 953 genes, 3.4%	285 out of 10716 genes, 2.7%	1
biological_process	response to oxidative stress	5 out of 953 genes, 0.5%	29 out of 10716 genes, 0.3%	1
biological_process	alcohol biosynthetic process	4 out of 953 genes, 0.4%	21 out of 10716 genes, 0.2%	1
biological_process	organic hydroxy compound biosynthetic process	4 out of 953 genes, 0.4%	21 out of 10716 genes, 0.2%	1
biological_process	response to chemical stimulus	87 out of 953 genes, 9.1%	862 out of 10716 genes, 8.0%	1
biological_process	calcium ion transport	3 out of 953 genes, 0.3%	14 out of 10716 genes, 0.1%	1
biological_process	dehiscence	2 out of 953 genes, 0.2%	7 out of 10716 genes, 0.1%	1
biological_process	cell wall polysaccharide metabolic process	2 out of 953 genes, 0.2%	7 out of 10716 genes, 0.1%	1
biological_process	cell wall macromolecule metabolic process	2 out of 953 genes, 0.2%	7 out of 10716 genes, 0.1%	1
biological_process	glycerolipid biosynthetic process	2 out of 953 genes, 0.2%	7 out of 10716 genes, 0.1%	1
biological_process	glycerophospholipid biosynthetic process	2 out of 953 genes, 0.2%	7 out of 10716 genes, 0.1%	1
biological_process	small molecule biosynthetic process	29 out of 953 genes, 3.0%	262 out of 10716 genes, 2.4%	1
biological_process	response to light intensity	6 out of 953 genes, 0.6%	39 out of 10716 genes, 0.4%	1
biological_process	phyllome development	9 out of 953 genes, 0.9%	66 out of 10716 genes, 0.6%	1
biological_process	cellular ion homeostasis	7 out of 953 genes, 0.7%	48 out of 10716 genes, 0.4%	1
biological_process	cellular chemical homeostasis	7 out of 953 genes, 0.7%	48 out of 10716 genes, 0.4%	1
biological_process	shoot system development	10 out of 953 genes, 1.0%	76 out of 10716 genes, 0.7%	1
biological_process	peptide transport	6 out of 953 genes, 0.6%	40 out of 10716 genes, 0.4%	1
biological_process	organic acid biosynthetic process	20 out of 953 genes, 2.1%	174 out of 10716 genes, 1.6%	1
biological_process	carboxylic acid biosynthetic process	20 out of 953 genes, 2.1%	174 out of 10716 genes, 1.6%	1
biological_process	polyamine biosynthetic process	3 out of 953 genes, 0.3%	15 out of 10716 genes, 0.1%	1
biological_process	jasmonic acid metabolic process	3 out of 953 genes, 0.3%	15 out of 10716 genes, 0.1%	1
biological_process	cellular glucan metabolic process	13 out of 953 genes, 1.4%	106 out of 10716 genes, 1.0%	1
biological_process	organonitrogen compound catabolic process	7 out of 953 genes, 0.7%	50 out of 10716 genes, 0.5%	1
biological_process	amide transport	6 out of 953 genes, 0.6%	41 out of 10716 genes, 0.4%	1
biological_process	anion transport	13 out of 953 genes, 1.4%	107 out of 10716 genes, 1.0%	1
biological_process	abscisic acid metabolic process	2 out of 953 genes, 0.2%	8 out of 10716 genes, 0.1%	1
biological_process	apocarotenoid metabolic process	2 out of 953 genes, 0.2%	8 out of 10716 genes, 0.1%	1
biological_process	defense response	22 out of 953 genes, 2.3%	197 out of 10716 genes, 1.8%	1
biological_process	steroid hormone mediated signaling pathway	4 out of 953 genes, 0.4%	24 out of 10716 genes, 0.2%	1
biological_process	response to steroid hormone stimulus	4 out of 953 genes, 0.4%	24 out of 10716 genes, 0.2%	1
biological_process	cellular response to steroid hormone stimulus	4 out of 953 genes, 0.4%	24 out of 10716 genes, 0.2%	1
biological_process	cellular biogenic amine biosynthetic process	3 out of 953 genes, 0.3%	16 out of 10716 genes, 0.1%	1
biological_process	response to stress	99 out of 953 genes, 10.4%	1014 out of 10716 genes, 9.5%	1
biological_process	cellular lipid metabolic process	39 out of 953 genes, 4.1%	376 out of 10716 genes, 3.5%	1
biological_process	pattern specification process	9 out of 953 genes, 0.9%	72 out of 10716 genes, 0.7%	1
biological_process	auxin metabolic process	3 out of 953 genes, 0.3%	17 out of 10716 genes, 0.2%	1
biological_process	divalent metal ion transport	5 out of 953 genes, 0.5%	35 out of 10716 genes, 0.3%	1
biological_process	divalent inorganic cation transport	5 out of 953 genes, 0.5%	35 out of 10716 genes, 0.3%	1
biological_process	response to stimulus	212 out of 953 genes, 22.2%	2264 out of 10716 genes, 21.1%	1
biological_process	L-serine metabolic process	3 out of 953 genes, 0.3%	18 out of 10716 genes, 0.2%	1
biological_process	polyamine metabolic process	3 out of 953 genes, 0.3%	18 out of 10716 genes, 0.2%	1
biological_process	ethylene metabolic process	3 out of 953 genes, 0.3%	18 out of 10716 genes, 0.2%	1
biological_process	axis specification	3 out of 953 genes, 0.3%	18 out of 10716 genes, 0.2%	1
biological_process	indole-containing compound metabolic process	3 out of 953 genes, 0.3%	18 out of 10716 genes, 0.2%	1
biological_process	cellular alkene metabolic process	3 out of 953 genes, 0.3%	18 out of 10716 genes, 0.2%	1
biological_process	olefin metabolic process	3 out of 953 genes, 0.3%	18 out of 10716 genes, 0.2%	1
biological_process	developmental cell growth	4 out of 953 genes, 0.4%	27 out of 10716 genes, 0.3%	1
biological_process	cellular component morphogenesis	18 out of 953 genes, 1.9%	166 out of 10716 genes, 1.5%	1
biological_process	phytosteroid metabolic process	2 out of 953 genes, 0.2%	10 out of 10716 genes, 0.1%	1
biological_process	organ morphogenesis	7 out of 953 genes, 0.7%	56 out of 10716 genes, 0.5%	1
biological_process	terpenoid metabolic process	8 out of 953 genes, 0.8%	66 out of 10716 genes, 0.6%	1
biological_process	flavone metabolic process	4 out of 953 genes, 0.4%	28 out of 10716 genes, 0.3%	1
biological_process	flavone biosynthetic process	4 out of 953 genes, 0.4%	28 out of 10716 genes, 0.3%	1
biological_process	amine biosynthetic process	3 out of 953 genes, 0.3%	19 out of 10716 genes, 0.2%	1
biological_process	lignin metabolic process	6 out of 953 genes, 0.6%	48 out of 10716 genes, 0.4%	1
biological_process	trichoblast differentiation	2 out of 953 genes, 0.2%	11 out of 10716 genes, 0.1%	1
biological_process	diterpenoid metabolic process	2 out of 953 genes, 0.2%	11 out of 10716 genes, 0.1%	1
biological_process	cellular response to organic substance	19 out of 953 genes, 2.0%	183 out of 10716 genes, 1.7%	1
biological_process	hormone metabolic process	4 out of 953 genes, 0.4%	30 out of 10716 genes, 0.3%	1
biological_process	isoprenoid metabolic process	10 out of 953 genes, 1.0%	90 out of 10716 genes, 0.8%	1
biological_process	single-organism transport	79 out of 953 genes, 8.3%	832 out of 10716 genes, 7.8%	1
biological_process	cellular developmental process	24 out of 953 genes, 2.5%	238 out of 10716 genes, 2.2%	1
biological_process	thiamine metabolic process	2 out of 953 genes, 0.2%	12 out of 10716 genes, 0.1%	1
biological_process	alditol metabolic process	2 out of 953 genes, 0.2%	12 out of 10716 genes, 0.1%	1
biological_process	cell fate commitment	2 out of 953 genes, 0.2%	12 out of 10716 genes, 0.1%	1
biological_process	cellular polysaccharide metabolic process	13 out of 953 genes, 1.4%	123 out of 10716 genes, 1.1%	1
biological_process	response to oxygen-containing compound	15 out of 953 genes, 1.6%	144 out of 10716 genes, 1.3%	1
biological_process	cell recognition	3 out of 953 genes, 0.3%	22 out of 10716 genes, 0.2%	1
biological_process	cation homeostasis	7 out of 953 genes, 0.7%	62 out of 10716 genes, 0.6%	1
biological_process	chemical homeostasis	10 out of 953 genes, 1.0%	93 out of 10716 genes, 0.9%	1
biological_process	phospholipid biosynthetic process	2 out of 953 genes, 0.2%	13 out of 10716 genes, 0.1%	1
biological_process	root epidermal cell differentiation	2 out of 953 genes, 0.2%	13 out of 10716 genes, 0.1%	1
biological_process	multicellular organism reproduction	2 out of 953 genes, 0.2%	13 out of 10716 genes, 0.1%	1
biological_process	regulation of cellular component size	2 out of 953 genes, 0.2%	13 out of 10716 genes, 0.1%	1
biological_process	thiamine-containing compound metabolic process	2 out of 953 genes, 0.2%	13 out of 10716 genes, 0.1%	1
biological_process	multicellular organismal reproductive process	2 out of 953 genes, 0.2%	13 out of 10716 genes, 0.1%	1
biological_process	regulation of anatomical structure size	2 out of 953 genes, 0.2%	13 out of 10716 genes, 0.1%	1
biological_process	response to red or far red light	7 out of 953 genes, 0.7%	63 out of 10716 genes, 0.6%	1
biological_process	polyol metabolic process	3 out of 953 genes, 0.3%	23 out of 10716 genes, 0.2%	1
biological_process	cell wall biogenesis	4 out of 953 genes, 0.4%	33 out of 10716 genes, 0.3%	1
biological_process	nitrogen compound transport	14 out of 953 genes, 1.5%	138 out of 10716 genes, 1.3%	1
biological_process	response to lipid	6 out of 953 genes, 0.6%	54 out of 10716 genes, 0.5%	1
biological_process	peroxisome organization	2 out of 953 genes, 0.2%	14 out of 10716 genes, 0.1%	1
biological_process	cell proliferation	2 out of 953 genes, 0.2%	14 out of 10716 genes, 0.1%	1
biological_process	response to disaccharide stimulus	2 out of 953 genes, 0.2%	14 out of 10716 genes, 0.1%	1
biological_process	regulation of growth	2 out of 953 genes, 0.2%	14 out of 10716 genes, 0.1%	1
biological_process	sulfur amino acid biosynthetic process	4 out of 953 genes, 0.4%	34 out of 10716 genes, 0.3%	1
biological_process	steroid metabolic process	4 out of 953 genes, 0.4%	34 out of 10716 genes, 0.3%	1
biological_process	response to carbohydrate stimulus	8 out of 953 genes, 0.8%	76 out of 10716 genes, 0.7%	1
biological_process	cellular response to chemical stimulus	19 out of 953 genes, 2.0%	196 out of 10716 genes, 1.8%	1
biological_process	cell morphogenesis	15 out of 953 genes, 1.6%	153 out of 10716 genes, 1.4%	1
biological_process	cellular response to lipid	5 out of 953 genes, 0.5%	47 out of 10716 genes, 0.4%	1
biological_process	single-organism carbohydrate metabolic process	27 out of 953 genes, 2.8%	287 out of 10716 genes, 2.7%	1
biological_process	post-embryonic morphogenesis	3 out of 953 genes, 0.3%	26 out of 10716 genes, 0.2%	1
biological_process	pollen development	4 out of 953 genes, 0.4%	37 out of 10716 genes, 0.3%	1
biological_process	sulfur compound biosynthetic process	4 out of 953 genes, 0.4%	37 out of 10716 genes, 0.3%	1
biological_process	post-embryonic root development	4 out of 953 genes, 0.4%	37 out of 10716 genes, 0.3%	1
biological_process	epidermis development	4 out of 953 genes, 0.4%	38 out of 10716 genes, 0.4%	1
biological_process	anatomical structure formation involved in morphogenesis	4 out of 953 genes, 0.4%	38 out of 10716 genes, 0.4%	1
biological_process	alpha-amino acid metabolic process	16 out of 953 genes, 1.7%	170 out of 10716 genes, 1.6%	1
biological_process	copper ion transport	2 out of 953 genes, 0.2%	17 out of 10716 genes, 0.2%	1
biological_process	hyperosmotic response	2 out of 953 genes, 0.2%	17 out of 10716 genes, 0.2%	1
biological_process	circadian rhythm	2 out of 953 genes, 0.2%	17 out of 10716 genes, 0.2%	1
biological_process	sulfur amino acid metabolic process	4 out of 953 genes, 0.4%	39 out of 10716 genes, 0.4%	1
biological_process	negative regulation of molecular function	5 out of 953 genes, 0.5%	50 out of 10716 genes, 0.5%	1
biological_process	glycerophospholipid metabolic process	4 out of 953 genes, 0.4%	40 out of 10716 genes, 0.4%	1
biological_process	ion homeostasis	7 out of 953 genes, 0.7%	74 out of 10716 genes, 0.7%	1
biological_process	regulation of hormone levels	6 out of 953 genes, 0.6%	63 out of 10716 genes, 0.6%	1
biological_process	single organism reproductive process	3 out of 953 genes, 0.3%	30 out of 10716 genes, 0.3%	1
biological_process	regionalization	6 out of 953 genes, 0.6%	64 out of 10716 genes, 0.6%	1
biological_process	steroid biosynthetic process	2 out of 953 genes, 0.2%	19 out of 10716 genes, 0.2%	1
biological_process	chloroplast organization	2 out of 953 genes, 0.2%	19 out of 10716 genes, 0.2%	1
biological_process	seed germination	2 out of 953 genes, 0.2%	19 out of 10716 genes, 0.2%	1
biological_process	seedling development	2 out of 953 genes, 0.2%	19 out of 10716 genes, 0.2%	1
biological_process	cellular component organization	68 out of 953 genes, 7.1%	764 out of 10716 genes, 7.1%	1
biological_process	developmental growth	4 out of 953 genes, 0.4%	42 out of 10716 genes, 0.4%	1
biological_process	localization	151 out of 953 genes, 15.8%	1702 out of 10716 genes, 15.9%	1
biological_process	transcription, DNA-dependent	52 out of 953 genes, 5.5%	587 out of 10716 genes, 5.5%	1
biological_process	RNA biosynthetic process	52 out of 953 genes, 5.5%	587 out of 10716 genes, 5.5%	1
biological_process	glycerolipid metabolic process	4 out of 953 genes, 0.4%	43 out of 10716 genes, 0.4%	1
biological_process	cellular response to organic cyclic compound	4 out of 953 genes, 0.4%	43 out of 10716 genes, 0.4%	1
biological_process	cell growth	6 out of 953 genes, 0.6%	66 out of 10716 genes, 0.6%	1
biological_process	cellular amide metabolic process	2 out of 953 genes, 0.2%	20 out of 10716 genes, 0.2%	1
biological_process	flavonoid biosynthetic process	5 out of 953 genes, 0.5%	55 out of 10716 genes, 0.5%	1
biological_process	single-organism developmental process	38 out of 953 genes, 4.0%	431 out of 10716 genes, 4.0%	1
biological_process	pyrimidine-containing compound metabolic process	3 out of 953 genes, 0.3%	32 out of 10716 genes, 0.3%	1
biological_process	anatomical structure morphogenesis	27 out of 953 genes, 2.8%	309 out of 10716 genes, 2.9%	1
biological_process	recombinational repair	2 out of 953 genes, 0.2%	21 out of 10716 genes, 0.2%	1
biological_process	organic acid transport	4 out of 953 genes, 0.4%	45 out of 10716 genes, 0.4%	1
biological_process	carboxylic acid transport	4 out of 953 genes, 0.4%	45 out of 10716 genes, 0.4%	1
biological_process	isoprenoid biosynthetic process	3 out of 953 genes, 0.3%	34 out of 10716 genes, 0.3%	1
biological_process	serine family amino acid metabolic process	4 out of 953 genes, 0.4%	46 out of 10716 genes, 0.4%	1
biological_process	response to organic cyclic compound	4 out of 953 genes, 0.4%	46 out of 10716 genes, 0.4%	1
biological_process	gravitropism	2 out of 953 genes, 0.2%	22 out of 10716 genes, 0.2%	1
biological_process	flavonoid metabolic process	5 out of 953 genes, 0.5%	58 out of 10716 genes, 0.5%	1
biological_process	water-soluble vitamin metabolic process	3 out of 953 genes, 0.3%	35 out of 10716 genes, 0.3%	1
biological_process	epidermal cell differentiation	3 out of 953 genes, 0.3%	35 out of 10716 genes, 0.3%	1
biological_process	membrane lipid metabolic process	2 out of 953 genes, 0.2%	23 out of 10716 genes, 0.2%	1
biological_process	response to gravity	2 out of 953 genes, 0.2%	23 out of 10716 genes, 0.2%	1
biological_process	root system development	6 out of 953 genes, 0.6%	72 out of 10716 genes, 0.7%	1
biological_process	root development	6 out of 953 genes, 0.6%	72 out of 10716 genes, 0.7%	1
biological_process	sulfur compound metabolic process	7 out of 953 genes, 0.7%	84 out of 10716 genes, 0.8%	1
biological_process	enzyme linked receptor protein signaling pathway	3 out of 953 genes, 0.3%	36 out of 10716 genes, 0.3%	1
biological_process	tropism	3 out of 953 genes, 0.3%	36 out of 10716 genes, 0.3%	1
biological_process	rhythmic process	3 out of 953 genes, 0.3%	36 out of 10716 genes, 0.3%	1
biological_process	response to abscisic acid stimulus	2 out of 953 genes, 0.2%	24 out of 10716 genes, 0.2%	1
biological_process	amino acid transport	3 out of 953 genes, 0.3%	37 out of 10716 genes, 0.3%	1
biological_process	transport	130 out of 953 genes, 13.6%	1503 out of 10716 genes, 14.0%	1
biological_process	pigment biosynthetic process	5 out of 953 genes, 0.5%	62 out of 10716 genes, 0.6%	1
biological_process	meristem maintenance	2 out of 953 genes, 0.2%	25 out of 10716 genes, 0.2%	1
biological_process	response to alcohol	2 out of 953 genes, 0.2%	25 out of 10716 genes, 0.2%	1
biological_process	cellular protein complex assembly	5 out of 953 genes, 0.5%	63 out of 10716 genes, 0.6%	1
biological_process	vitamin metabolic process	4 out of 953 genes, 0.4%	51 out of 10716 genes, 0.5%	1
biological_process	carbohydrate derivative metabolic process	12 out of 953 genes, 1.3%	150 out of 10716 genes, 1.4%	1
biological_process	ketone biosynthetic process	5 out of 953 genes, 0.5%	65 out of 10716 genes, 0.6%	1
biological_process	pigment metabolic process	5 out of 953 genes, 0.5%	65 out of 10716 genes, 0.6%	1
biological_process	meristem development	4 out of 953 genes, 0.4%	53 out of 10716 genes, 0.5%	1
biological_process	root morphogenesis	3 out of 953 genes, 0.3%	41 out of 10716 genes, 0.4%	1
biological_process	nucleosome organization	3 out of 953 genes, 0.3%	41 out of 10716 genes, 0.4%	1
biological_process	organic anion transport	4 out of 953 genes, 0.4%	54 out of 10716 genes, 0.5%	1
biological_process	cellular macromolecular complex assembly	5 out of 953 genes, 0.5%	67 out of 10716 genes, 0.6%	1
biological_process	establishment of localization	141 out of 953 genes, 14.8%	1652 out of 10716 genes, 15.4%	1
biological_process	metabolic process	677 out of 953 genes, 71.0%	7698 out of 10716 genes, 71.8%	1
biological_process	response to temperature stimulus	3 out of 953 genes, 0.3%	42 out of 10716 genes, 0.4%	1
biological_process	protein-DNA complex subunit organization	3 out of 953 genes, 0.3%	42 out of 10716 genes, 0.4%	1
biological_process	nuclear transport	2 out of 953 genes, 0.2%	29 out of 10716 genes, 0.3%	1
biological_process	regulation of cell cycle	2 out of 953 genes, 0.2%	29 out of 10716 genes, 0.3%	1
biological_process	post-embryonic organ development	4 out of 953 genes, 0.4%	56 out of 10716 genes, 0.5%	1
biological_process	protein complex assembly	5 out of 953 genes, 0.5%	69 out of 10716 genes, 0.6%	1
biological_process	microtubule-based process	6 out of 953 genes, 0.6%	82 out of 10716 genes, 0.8%	1
biological_process	cellular amino acid biosynthetic process	9 out of 953 genes, 0.9%	120 out of 10716 genes, 1.1%	1
biological_process	response to external stimulus	10 out of 953 genes, 1.0%	133 out of 10716 genes, 1.2%	1
biological_process	protein complex biogenesis	5 out of 953 genes, 0.5%	70 out of 10716 genes, 0.7%	1
biological_process	cell surface receptor signaling pathway	4 out of 953 genes, 0.4%	57 out of 10716 genes, 0.5%	1
biological_process	cellular response to starvation	4 out of 953 genes, 0.4%	57 out of 10716 genes, 0.5%	1
biological_process	response to starvation	4 out of 953 genes, 0.4%	57 out of 10716 genes, 0.5%	1
biological_process	signal transduction	37 out of 953 genes, 3.9%	459 out of 10716 genes, 4.3%	1
biological_process	single organism signaling	37 out of 953 genes, 3.9%	459 out of 10716 genes, 4.3%	1
biological_process	terpenoid biosynthetic process	2 out of 953 genes, 0.2%	31 out of 10716 genes, 0.3%	1
biological_process	response to nutrient levels	5 out of 953 genes, 0.5%	72 out of 10716 genes, 0.7%	1
biological_process	ion transmembrane transport	6 out of 953 genes, 0.6%	86 out of 10716 genes, 0.8%	1
biological_process	carboxylic acid metabolic process	58 out of 953 genes, 6.1%	716 out of 10716 genes, 6.7%	1
biological_process	phospholipid metabolic process	5 out of 953 genes, 0.5%	74 out of 10716 genes, 0.7%	1
biological_process	auxin transport	2 out of 953 genes, 0.2%	33 out of 10716 genes, 0.3%	1
biological_process	response to extracellular stimulus	5 out of 953 genes, 0.5%	75 out of 10716 genes, 0.7%	1
biological_process	gametophyte development	10 out of 953 genes, 1.0%	140 out of 10716 genes, 1.3%	1
biological_process	oxoacid metabolic process	58 out of 953 genes, 6.1%	722 out of 10716 genes, 6.7%	1
biological_process	cellular ketone metabolic process	5 out of 953 genes, 0.5%	76 out of 10716 genes, 0.7%	1
biological_process	organic cyclic compound biosynthetic process	72 out of 953 genes, 7.6%	887 out of 10716 genes, 8.3%	1
biological_process	hormone transport	2 out of 953 genes, 0.2%	34 out of 10716 genes, 0.3%	1
biological_process	organic acid metabolic process	58 out of 953 genes, 6.1%	723 out of 10716 genes, 6.7%	1
biological_process	cellular response to nutrient levels	4 out of 953 genes, 0.4%	63 out of 10716 genes, 0.6%	1
biological_process	aromatic compound biosynthetic process	70 out of 953 genes, 7.3%	867 out of 10716 genes, 8.1%	1
biological_process	regulation of biological quality	22 out of 953 genes, 2.3%	295 out of 10716 genes, 2.8%	1
biological_process	macromolecular complex assembly	5 out of 953 genes, 0.5%	79 out of 10716 genes, 0.7%	1
biological_process	cellular component organization or biogenesis	70 out of 953 genes, 7.3%	874 out of 10716 genes, 8.2%	1
biological_process	cellular response to extracellular stimulus	4 out of 953 genes, 0.4%	66 out of 10716 genes, 0.6%	1
biological_process	cellular response to external stimulus	4 out of 953 genes, 0.4%	66 out of 10716 genes, 0.6%	1
biological_process	cellular modified amino acid metabolic process	2 out of 953 genes, 0.2%	37 out of 10716 genes, 0.3%	1
biological_process	positive regulation of biological process	2 out of 953 genes, 0.2%	37 out of 10716 genes, 0.3%	1
biological_process	cell communication	41 out of 953 genes, 4.3%	531 out of 10716 genes, 5.0%	1
biological_process	protein complex subunit organization	5 out of 953 genes, 0.5%	81 out of 10716 genes, 0.8%	1
biological_process	homeostatic process	14 out of 953 genes, 1.5%	200 out of 10716 genes, 1.9%	1
biological_process	DNA recombination	2 out of 953 genes, 0.2%	38 out of 10716 genes, 0.4%	1
biological_process	cell development	8 out of 953 genes, 0.8%	123 out of 10716 genes, 1.1%	1
biological_process	transmembrane transport	6 out of 953 genes, 0.6%	96 out of 10716 genes, 0.9%	1
biological_process	cellular homeostasis	10 out of 953 genes, 1.0%	150 out of 10716 genes, 1.4%	1
biological_process	regulation of molecular function	6 out of 953 genes, 0.6%	97 out of 10716 genes, 0.9%	1
biological_process	response to osmotic stress	14 out of 953 genes, 1.5%	203 out of 10716 genes, 1.9%	1
biological_process	nucleobase-containing compound biosynthetic process	57 out of 953 genes, 6.0%	732 out of 10716 genes, 6.8%	1
biological_process	response to light stimulus	14 out of 953 genes, 1.5%	204 out of 10716 genes, 1.9%	1
biological_process	DNA replication	2 out of 953 genes, 0.2%	40 out of 10716 genes, 0.4%	1
biological_process	nucleoside triphosphate catabolic process	14 out of 953 genes, 1.5%	205 out of 10716 genes, 1.9%	1
biological_process	purine nucleoside triphosphate catabolic process	14 out of 953 genes, 1.5%	205 out of 10716 genes, 1.9%	1
biological_process	ribonucleoside triphosphate catabolic process	14 out of 953 genes, 1.5%	205 out of 10716 genes, 1.9%	1
biological_process	purine ribonucleoside triphosphate catabolic process	14 out of 953 genes, 1.5%	205 out of 10716 genes, 1.9%	1
biological_process	organophosphate catabolic process	14 out of 953 genes, 1.5%	206 out of 10716 genes, 1.9%	1
biological_process	nucleoside phosphate catabolic process	14 out of 953 genes, 1.5%	206 out of 10716 genes, 1.9%	1
biological_process	response to radiation	20 out of 953 genes, 2.1%	284 out of 10716 genes, 2.7%	1
biological_process	negative regulation of cellular process	2 out of 953 genes, 0.2%	42 out of 10716 genes, 0.4%	1
biological_process	response to abiotic stimulus	46 out of 953 genes, 4.8%	612 out of 10716 genes, 5.7%	1
biological_process	signaling	43 out of 953 genes, 4.5%	579 out of 10716 genes, 5.4%	1
biological_process	macromolecular complex subunit organization	8 out of 953 genes, 0.8%	133 out of 10716 genes, 1.2%	1
biological_process	purine nucleoside triphosphate biosynthetic process	5 out of 953 genes, 0.5%	91 out of 10716 genes, 0.8%	1
biological_process	ribonucleoside triphosphate biosynthetic process	5 out of 953 genes, 0.5%	91 out of 10716 genes, 0.8%	1
biological_process	purine ribonucleoside triphosphate biosynthetic process	5 out of 953 genes, 0.5%	91 out of 10716 genes, 0.8%	1
biological_process	cellular process involved in reproduction	2 out of 953 genes, 0.2%	45 out of 10716 genes, 0.4%	1
biological_process	nucleoside triphosphate biosynthetic process	5 out of 953 genes, 0.5%	92 out of 10716 genes, 0.9%	1
biological_process	DNA repair	5 out of 953 genes, 0.5%	93 out of 10716 genes, 0.9%	1
biological_process	aromatic compound catabolic process	15 out of 953 genes, 1.6%	231 out of 10716 genes, 2.2%	1
biological_process	nucleobase-containing compound catabolic process	14 out of 953 genes, 1.5%	219 out of 10716 genes, 2.0%	1
biological_process	cellular nitrogen compound biosynthetic process	61 out of 953 genes, 6.4%	808 out of 10716 genes, 7.5%	1
biological_process	carbohydrate catabolic process	6 out of 953 genes, 0.6%	109 out of 10716 genes, 1.0%	1
biological_process	cell differentiation	9 out of 953 genes, 0.9%	152 out of 10716 genes, 1.4%	1
biological_process	response to DNA damage stimulus	5 out of 953 genes, 0.5%	95 out of 10716 genes, 0.9%	1
biological_process	cellular nitrogen compound catabolic process	15 out of 953 genes, 1.6%	234 out of 10716 genes, 2.2%	1
biological_process	heterocycle catabolic process	15 out of 953 genes, 1.6%	234 out of 10716 genes, 2.2%	1
biological_process	one-carbon metabolic process	14 out of 953 genes, 1.5%	221 out of 10716 genes, 2.1%	1
biological_process	organic cyclic compound catabolic process	15 out of 953 genes, 1.6%	235 out of 10716 genes, 2.2%	1
biological_process	response to biotic stimulus	10 out of 953 genes, 1.0%	168 out of 10716 genes, 1.6%	1
biological_process	organ development	20 out of 953 genes, 2.1%	302 out of 10716 genes, 2.8%	1
biological_process	tissue development	7 out of 953 genes, 0.7%	127 out of 10716 genes, 1.2%	1
biological_process	cellular component assembly	5 out of 953 genes, 0.5%	99 out of 10716 genes, 0.9%	1
biological_process	heterocycle biosynthetic process	62 out of 953 genes, 6.5%	833 out of 10716 genes, 7.8%	1
biological_process	glutamine family amino acid metabolic process	2 out of 953 genes, 0.2%	51 out of 10716 genes, 0.5%	1
biological_process	response to metal ion	16 out of 953 genes, 1.7%	255 out of 10716 genes, 2.4%	1
biological_process	cell morphogenesis involved in differentiation	4 out of 953 genes, 0.4%	86 out of 10716 genes, 0.8%	1
biological_process	immune system process	2 out of 953 genes, 0.2%	53 out of 10716 genes, 0.5%	1
biological_process	response to inorganic substance	19 out of 953 genes, 2.0%	299 out of 10716 genes, 2.8%	1
biological_process	organic substance biosynthetic process	117 out of 953 genes, 12.3%	1509 out of 10716 genes, 14.1%	1
biological_process	growth	6 out of 953 genes, 0.6%	119 out of 10716 genes, 1.1%	1
biological_process	cellular response to stimulus	49 out of 953 genes, 5.1%	686 out of 10716 genes, 6.4%	1
biological_process	post-embryonic development	17 out of 953 genes, 1.8%	277 out of 10716 genes, 2.6%	1
biological_process	purine nucleoside triphosphate metabolic process	17 out of 953 genes, 1.8%	278 out of 10716 genes, 2.6%	1
biological_process	ribonucleoside triphosphate metabolic process	17 out of 953 genes, 1.8%	278 out of 10716 genes, 2.6%	1
biological_process	purine ribonucleoside triphosphate metabolic process	17 out of 953 genes, 1.8%	278 out of 10716 genes, 2.6%	1
biological_process	nucleoside triphosphate metabolic process	17 out of 953 genes, 1.8%	281 out of 10716 genes, 2.6%	1
biological_process	cell cycle phase	2 out of 953 genes, 0.2%	58 out of 10716 genes, 0.5%	1
biological_process	energy derivation by oxidation of organic compounds	3 out of 953 genes, 0.3%	76 out of 10716 genes, 0.7%	1
biological_process	single-organism process	240 out of 953 genes, 25.2%	2972 out of 10716 genes, 27.7%	1
biological_process	chromatin modification	2 out of 953 genes, 0.2%	59 out of 10716 genes, 0.6%	1
biological_process	cell cycle	6 out of 953 genes, 0.6%	126 out of 10716 genes, 1.2%	1
biological_process	cellular response to stress	11 out of 953 genes, 1.2%	202 out of 10716 genes, 1.9%	1
biological_process	glycosyl compound metabolic process	2 out of 953 genes, 0.2%	61 out of 10716 genes, 0.6%	1
biological_process	response to other organism	7 out of 953 genes, 0.7%	144 out of 10716 genes, 1.3%	1
biological_process	organonitrogen compound biosynthetic process	16 out of 953 genes, 1.7%	274 out of 10716 genes, 2.6%	1
biological_process	cellular respiration	2 out of 953 genes, 0.2%	63 out of 10716 genes, 0.6%	1
biological_process	macromolecule biosynthetic process	70 out of 953 genes, 7.3%	973 out of 10716 genes, 9.1%	1
biological_process	cellular amino acid metabolic process	26 out of 953 genes, 2.7%	413 out of 10716 genes, 3.9%	1
biological_process	electron transport chain	2 out of 953 genes, 0.2%	65 out of 10716 genes, 0.6%	1
biological_process	intracellular signal transduction	4 out of 953 genes, 0.4%	104 out of 10716 genes, 1.0%	1
biological_process	organophosphate biosynthetic process	7 out of 953 genes, 0.7%	153 out of 10716 genes, 1.4%	1
biological_process	single-organism cellular process	160 out of 953 genes, 16.8%	2082 out of 10716 genes, 19.4%	1
biological_process	biosynthetic process	118 out of 953 genes, 12.4%	1579 out of 10716 genes, 14.7%	1
biological_process	macromolecule localization	17 out of 953 genes, 1.8%	303 out of 10716 genes, 2.8%	1
biological_process	regulation of transcription, DNA-dependent	4 out of 953 genes, 0.4%	107 out of 10716 genes, 1.0%	1
biological_process	regulation of RNA metabolic process	4 out of 953 genes, 0.4%	107 out of 10716 genes, 1.0%	1
biological_process	regulation of RNA biosynthetic process	4 out of 953 genes, 0.4%	107 out of 10716 genes, 1.0%	1
biological_process	regulation of cellular process	48 out of 953 genes, 5.0%	717 out of 10716 genes, 6.7%	1
biological_process	cellular macromolecule biosynthetic process	66 out of 953 genes, 6.9%	949 out of 10716 genes, 8.9%	1
biological_process	anatomical structure development	41 out of 953 genes, 4.3%	630 out of 10716 genes, 5.9%	1
biological_process	macromolecule catabolic process	12 out of 953 genes, 1.3%	236 out of 10716 genes, 2.2%	1
biological_process	cellular biosynthetic process	113 out of 953 genes, 11.9%	1535 out of 10716 genes, 14.3%	1
biological_process	plastid organization	3 out of 953 genes, 0.3%	93 out of 10716 genes, 0.9%	1
biological_process	single-organism metabolic process	142 out of 953 genes, 14.9%	1888 out of 10716 genes, 17.6%	1
biological_process	multi-organism process	11 out of 953 genes, 1.2%	224 out of 10716 genes, 2.1%	1
biological_process	organonitrogen compound metabolic process	46 out of 953 genes, 4.8%	706 out of 10716 genes, 6.6%	1
biological_process	single-multicellular organism process	50 out of 953 genes, 5.2%	758 out of 10716 genes, 7.1%	1
biological_process	chromosome organization	5 out of 953 genes, 0.5%	132 out of 10716 genes, 1.2%	1
biological_process	regulation of macromolecule biosynthetic process	4 out of 953 genes, 0.4%	115 out of 10716 genes, 1.1%	1
biological_process	regulation of cellular macromolecule biosynthetic process	4 out of 953 genes, 0.4%	115 out of 10716 genes, 1.1%	1
biological_process	system development	25 out of 953 genes, 2.6%	429 out of 10716 genes, 4.0%	1
biological_process	cell cycle process	3 out of 953 genes, 0.3%	97 out of 10716 genes, 0.9%	1
biological_process	negative regulation of biological process	3 out of 953 genes, 0.3%	97 out of 10716 genes, 0.9%	1
biological_process	organophosphate metabolic process	28 out of 953 genes, 2.9%	472 out of 10716 genes, 4.4%	1
biological_process	multicellular organismal development	46 out of 953 genes, 4.8%	712 out of 10716 genes, 6.6%	1
biological_process	regulation of cellular biosynthetic process	4 out of 953 genes, 0.4%	117 out of 10716 genes, 1.1%	1
biological_process	regulation of biosynthetic process	4 out of 953 genes, 0.4%	118 out of 10716 genes, 1.1%	1
biological_process	developmental process involved in reproduction	31 out of 953 genes, 3.3%	516 out of 10716 genes, 4.8%	1
biological_process	chromatin organization	4 out of 953 genes, 0.4%	119 out of 10716 genes, 1.1%	1
biological_process	protein modification by small protein conjugation	4 out of 953 genes, 0.4%	119 out of 10716 genes, 1.1%	1
biological_process	nucleoside phosphate biosynthetic process	5 out of 953 genes, 0.5%	137 out of 10716 genes, 1.3%	1
biological_process	flower development	3 out of 953 genes, 0.3%	102 out of 10716 genes, 1.0%	1
biological_process	reproduction	38 out of 953 genes, 4.0%	619 out of 10716 genes, 5.8%	1
biological_process	organic substance transport	25 out of 953 genes, 2.6%	445 out of 10716 genes, 4.2%	1
biological_process	small molecule metabolic process	106 out of 953 genes, 11.1%	1493 out of 10716 genes, 13.9%	1
biological_process	oxidation-reduction process	4 out of 953 genes, 0.4%	127 out of 10716 genes, 1.2%	1
biological_process	hexose metabolic process	4 out of 953 genes, 0.4%	129 out of 10716 genes, 1.2%	1
biological_process	reproductive process	34 out of 953 genes, 3.6%	578 out of 10716 genes, 5.4%	1
biological_process	multicellular organismal process	53 out of 953 genes, 5.6%	832 out of 10716 genes, 7.8%	1
biological_process	glucose catabolic process	2 out of 953 genes, 0.2%	90 out of 10716 genes, 0.8%	1
biological_process	hexose catabolic process	2 out of 953 genes, 0.2%	90 out of 10716 genes, 0.8%	1
biological_process	monosaccharide catabolic process	2 out of 953 genes, 0.2%	90 out of 10716 genes, 0.8%	1
biological_process	monosaccharide metabolic process	5 out of 953 genes, 0.5%	149 out of 10716 genes, 1.4%	1
biological_process	generation of precursor metabolites and energy	8 out of 953 genes, 0.8%	202 out of 10716 genes, 1.9%	1
biological_process	single-organism carbohydrate catabolic process	2 out of 953 genes, 0.2%	95 out of 10716 genes, 0.9%	1
biological_process	cellular component biogenesis	9 out of 953 genes, 0.9%	224 out of 10716 genes, 2.1%	1
biological_process	protein modification by small protein conjugation or removal	4 out of 953 genes, 0.4%	138 out of 10716 genes, 1.3%	1
biological_process	glucose metabolic process	2 out of 953 genes, 0.2%	97 out of 10716 genes, 0.9%	1
biological_process	coenzyme metabolic process	2 out of 953 genes, 0.2%	97 out of 10716 genes, 0.9%	1
biological_process	cellular protein localization	2 out of 953 genes, 0.2%	97 out of 10716 genes, 0.9%	1
biological_process	cellular macromolecule localization	2 out of 953 genes, 0.2%	97 out of 10716 genes, 0.9%	1
biological_process	primary metabolic process	400 out of 953 genes, 42.0%	4996 out of 10716 genes, 46.6%	1
biological_process	developmental process	75 out of 953 genes, 7.9%	1142 out of 10716 genes, 10.7%	1
biological_process	regulation of nucleobase-containing compound metabolic process	4 out of 953 genes, 0.4%	141 out of 10716 genes, 1.3%	1
biological_process	nucleoside phosphate metabolic process	19 out of 953 genes, 2.0%	386 out of 10716 genes, 3.6%	1
biological_process	regulation of nitrogen compound metabolic process	4 out of 953 genes, 0.4%	142 out of 10716 genes, 1.3%	1
biological_process	biological regulation	78 out of 953 genes, 8.2%	1192 out of 10716 genes, 11.1%	1
biological_process	reproductive structure development	4 out of 953 genes, 0.4%	147 out of 10716 genes, 1.4%	1
biological_process	reproductive system development	4 out of 953 genes, 0.4%	147 out of 10716 genes, 1.4%	1
biological_process	regulation of biological process	55 out of 953 genes, 5.8%	897 out of 10716 genes, 8.4%	1
biological_process	nucleotide metabolic process	3 out of 953 genes, 0.3%	128 out of 10716 genes, 1.2%	1
biological_process	RNA metabolic process	57 out of 953 genes, 6.0%	938 out of 10716 genes, 8.8%	1
biological_process	nucleobase-containing small molecule metabolic process	19 out of 953 genes, 2.0%	407 out of 10716 genes, 3.8%	1
biological_process	regulation of primary metabolic process	4 out of 953 genes, 0.4%	160 out of 10716 genes, 1.5%	1
biological_process	organic substance catabolic process	31 out of 953 genes, 3.3%	596 out of 10716 genes, 5.6%	1
biological_process	intracellular transport	5 out of 953 genes, 0.5%	184 out of 10716 genes, 1.7%	1
biological_process	phosphorus metabolic process	43 out of 953 genes, 4.5%	767 out of 10716 genes, 7.2%	1
biological_process	phosphate-containing compound metabolic process	41 out of 953 genes, 4.3%	747 out of 10716 genes, 7.0%	1
biological_process	establishment of localization in cell	6 out of 953 genes, 0.6%	212 out of 10716 genes, 2.0%	1
biological_process	regulation of gene expression	5 out of 953 genes, 0.5%	194 out of 10716 genes, 1.8%	1
biological_process	cellular localization	7 out of 953 genes, 0.7%	236 out of 10716 genes, 2.2%	1
biological_process	regulation of cellular metabolic process	4 out of 953 genes, 0.4%	179 out of 10716 genes, 1.7%	1
biological_process	catabolic process	31 out of 953 genes, 3.3%	625 out of 10716 genes, 5.8%	1
biological_process	modification-dependent protein catabolic process	3 out of 953 genes, 0.3%	160 out of 10716 genes, 1.5%	1
biological_process	modification-dependent macromolecule catabolic process	3 out of 953 genes, 0.3%	160 out of 10716 genes, 1.5%	1
biological_process	cellular catabolic process	20 out of 953 genes, 2.1%	465 out of 10716 genes, 4.3%	1
biological_process	proteolysis involved in cellular protein catabolic process	3 out of 953 genes, 0.3%	163 out of 10716 genes, 1.5%	1
biological_process	tRNA metabolic process	2 out of 953 genes, 0.2%	139 out of 10716 genes, 1.3%	1
biological_process	cofactor metabolic process	3 out of 953 genes, 0.3%	164 out of 10716 genes, 1.5%	1
biological_process	regulation of macromolecule metabolic process	5 out of 953 genes, 0.5%	208 out of 10716 genes, 1.9%	1
biological_process	proteolysis	3 out of 953 genes, 0.3%	168 out of 10716 genes, 1.6%	1
biological_process	protein catabolic process	3 out of 953 genes, 0.3%	168 out of 10716 genes, 1.6%	1
biological_process	cellular protein catabolic process	3 out of 953 genes, 0.3%	168 out of 10716 genes, 1.6%	1
biological_process	protein localization	6 out of 953 genes, 0.6%	234 out of 10716 genes, 2.2%	1
biological_process	protein transport	5 out of 953 genes, 0.5%	217 out of 10716 genes, 2.0%	1
biological_process	establishment of protein localization	5 out of 953 genes, 0.5%	217 out of 10716 genes, 2.0%	1
biological_process	cellular macromolecule catabolic process	3 out of 953 genes, 0.3%	181 out of 10716 genes, 1.7%	1
biological_process	ncRNA metabolic process	2 out of 953 genes, 0.2%	161 out of 10716 genes, 1.5%	1
biological_process	cellular aromatic compound metabolic process	125 out of 953 genes, 13.1%	1974 out of 10716 genes, 18.4%	1
biological_process	RNA processing	2 out of 953 genes, 0.2%	174 out of 10716 genes, 1.6%	1
biological_process	cellular protein modification process	55 out of 953 genes, 5.8%	1057 out of 10716 genes, 9.9%	1
biological_process	protein modification process	55 out of 953 genes, 5.8%	1057 out of 10716 genes, 9.9%	1
biological_process	organic cyclic compound metabolic process	125 out of 953 genes, 13.1%	2019 out of 10716 genes, 18.8%	1
biological_process	DNA metabolic process	9 out of 953 genes, 0.9%	353 out of 10716 genes, 3.3%	1
biological_process	organelle organization	10 out of 953 genes, 1.0%	378 out of 10716 genes, 3.5%	1
biological_process	regulation of metabolic process	6 out of 953 genes, 0.6%	302 out of 10716 genes, 2.8%	1
biological_process	nucleic acid metabolic process	65 out of 953 genes, 6.8%	1264 out of 10716 genes, 11.8%	1
biological_process	macromolecule modification	56 out of 953 genes, 5.9%	1168 out of 10716 genes, 10.9%	1
biological_process	nitrogen compound metabolic process	131 out of 953 genes, 13.7%	2202 out of 10716 genes, 20.5%	1
biological_process	cellular nitrogen compound metabolic process	101 out of 953 genes, 10.6%	1846 out of 10716 genes, 17.2%	1
biological_process	heterocycle metabolic process	100 out of 953 genes, 10.5%	1873 out of 10716 genes, 17.5%	1
biological_process	nucleobase-containing compound metabolic process	85 out of 953 genes, 8.9%	1676 out of 10716 genes, 15.6%	1
biological_process	cellular protein metabolic process	60 out of 953 genes, 6.3%	1622 out of 10716 genes, 15.1%	1
biological_process	gene expression	62 out of 953 genes, 6.5%	1460 out of 10716 genes, 13.6%	1
biological_process	protein metabolic process	101 out of 953 genes, 10.6%	1967 out of 10716 genes, 18.4%	1
biological_process	cellular macromolecule metabolic process	140 out of 953 genes, 14.7%	2856 out of 10716 genes, 26.7%	1
biological_process	organic substance metabolic process	377 out of 953 genes, 39.6%	5442 out of 10716 genes, 50.8%	1
biological_process	macromolecule metabolic process	229 out of 953 genes, 24.0%	3777 out of 10716 genes, 35.2%	1
biological_process	cellular metabolic process	317 out of 953 genes, 33.3%	4986 out of 10716 genes, 46.5%	1
biological_process	cellular process	448 out of 953 genes, 47.0%	6445 out of 10716 genes, 60.1%	1

## Sheet: 1Avs4A
cellular_component	Gene Ontology term	Cluster frequency	Genome frequency of use	Corrected P-value
cellular_component	external encapsulating structure	108 out of 1439 genes, 7.5%	327 out of 9574 genes, 3.4%	9.54e-15
cellular_component	cell periphery	115 out of 1439 genes, 8.0%	385 out of 9574 genes, 4.0%	3.32e-12
cellular_component	cell wall	47 out of 1439 genes, 3.3%	139 out of 9574 genes, 1.5%	2.45e-06
cellular_component	extracellular region	71 out of 1439 genes, 4.9%	250 out of 9574 genes, 2.6%	3.36e-06
cellular_component	intrinsic to membrane	226 out of 1439 genes, 15.7%	1133 out of 9574 genes, 11.8%	0.00012
cellular_component	plant-type vacuole	16 out of 1439 genes, 1.1%	44 out of 9574 genes, 0.5%	0.04454
cellular_component	anchored to membrane	12 out of 1439 genes, 0.8%	33 out of 9574 genes, 0.3%	0.23359
cellular_component	membrane part	242 out of 1439 genes, 16.8%	1391 out of 9574 genes, 14.5%	0.52994
cellular_component	membrane	453 out of 1439 genes, 31.5%	2752 out of 9574 genes, 28.7%	0.8199
cellular_component	chromatin	13 out of 1439 genes, 0.9%	48 out of 9574 genes, 0.5%	1
cellular_component	vacuole	18 out of 1439 genes, 1.3%	74 out of 9574 genes, 0.8%	1
cellular_component	vesicle	79 out of 1439 genes, 5.5%	438 out of 9574 genes, 4.6%	1
cellular_component	cytoplasmic vesicle	78 out of 1439 genes, 5.4%	433 out of 9574 genes, 4.5%	1
cellular_component	cell-cell junction	3 out of 1439 genes, 0.2%	6 out of 9574 genes, 0.1%	1
cellular_component	extracellular matrix	3 out of 1439 genes, 0.2%	7 out of 9574 genes, 0.1%	1
cellular_component	cytoskeleton	33 out of 1439 genes, 2.3%	174 out of 9574 genes, 1.8%	1
cellular_component	cell junction	3 out of 1439 genes, 0.2%	8 out of 9574 genes, 0.1%	1
cellular_component	microtubule cytoskeleton	23 out of 1439 genes, 1.6%	118 out of 9574 genes, 1.2%	1
cellular_component	extracellular region part	5 out of 1439 genes, 0.3%	19 out of 9574 genes, 0.2%	1
cellular_component	integral to plasma membrane	2 out of 1439 genes, 0.1%	5 out of 9574 genes, 0.1%	1
cellular_component	intrinsic to plasma membrane	2 out of 1439 genes, 0.1%	5 out of 9574 genes, 0.1%	1
cellular_component	endosome membrane	4 out of 1439 genes, 0.3%	16 out of 9574 genes, 0.2%	1
cellular_component	endosomal part	4 out of 1439 genes, 0.3%	16 out of 9574 genes, 0.2%	1
cellular_component	cytoplasmic microtubule	2 out of 1439 genes, 0.1%	7 out of 9574 genes, 0.1%	1
cellular_component	endoplasmic reticulum part	9 out of 1439 genes, 0.6%	48 out of 9574 genes, 0.5%	1
cellular_component	plastid inner membrane	7 out of 1439 genes, 0.5%	37 out of 9574 genes, 0.4%	1
cellular_component	chromosome	23 out of 1439 genes, 1.6%	138 out of 9574 genes, 1.4%	1
cellular_component	endoplasmic reticulum	9 out of 1439 genes, 0.6%	50 out of 9574 genes, 0.5%	1
cellular_component	actin cytoskeleton	7 out of 1439 genes, 0.5%	39 out of 9574 genes, 0.4%	1
cellular_component	non-membrane-bounded organelle	70 out of 1439 genes, 4.9%	449 out of 9574 genes, 4.7%	1
cellular_component	intracellular non-membrane-bounded organelle	70 out of 1439 genes, 4.9%	449 out of 9574 genes, 4.7%	1
cellular_component	chromosomal part	16 out of 1439 genes, 1.1%	98 out of 9574 genes, 1.0%	1
cellular_component	nuclear chromosome	3 out of 1439 genes, 0.2%	16 out of 9574 genes, 0.2%	1
cellular_component	endosome	5 out of 1439 genes, 0.3%	29 out of 9574 genes, 0.3%	1
cellular_component	microtubule	2 out of 1439 genes, 0.1%	10 out of 9574 genes, 0.1%	1
cellular_component	cell projection	3 out of 1439 genes, 0.2%	17 out of 9574 genes, 0.2%	1
cellular_component	plastid membrane	9 out of 1439 genes, 0.6%	59 out of 9574 genes, 0.6%	1
cellular_component	proton-transporting V-type ATPase complex	3 out of 1439 genes, 0.2%	21 out of 9574 genes, 0.2%	1
cellular_component	cytoskeletal part	3 out of 1439 genes, 0.2%	21 out of 9574 genes, 0.2%	1
cellular_component	microbody	19 out of 1439 genes, 1.3%	139 out of 9574 genes, 1.5%	1
cellular_component	integral to membrane	6 out of 1439 genes, 0.4%	49 out of 9574 genes, 0.5%	1
cellular_component	plasma membrane	7 out of 1439 genes, 0.5%	57 out of 9574 genes, 0.6%	1
cellular_component	microbody part	2 out of 1439 genes, 0.1%	18 out of 9574 genes, 0.2%	1
cellular_component	peroxisomal part	2 out of 1439 genes, 0.1%	18 out of 9574 genes, 0.2%	1
cellular_component	plastid envelope	48 out of 1439 genes, 3.3%	355 out of 9574 genes, 3.7%	1
cellular_component	chloroplast envelope	3 out of 1439 genes, 0.2%	29 out of 9574 genes, 0.3%	1
cellular_component	proteasome regulatory particle	2 out of 1439 genes, 0.1%	21 out of 9574 genes, 0.2%	1
cellular_component	proteasome accessory complex	2 out of 1439 genes, 0.1%	21 out of 9574 genes, 0.2%	1
cellular_component	plastid outer membrane	2 out of 1439 genes, 0.1%	22 out of 9574 genes, 0.2%	1
cellular_component	endoplasmic reticulum membrane	3 out of 1439 genes, 0.2%	31 out of 9574 genes, 0.3%	1
cellular_component	nuclear outer membrane-endoplasmic reticulum membrane network	3 out of 1439 genes, 0.2%	31 out of 9574 genes, 0.3%	1
cellular_component	plasma membrane part	6 out of 1439 genes, 0.4%	56 out of 9574 genes, 0.6%	1
cellular_component	proton-transporting two-sector ATPase complex	6 out of 1439 genes, 0.4%	61 out of 9574 genes, 0.6%	1
cellular_component	membrane-bounded vesicle	4 out of 1439 genes, 0.3%	45 out of 9574 genes, 0.5%	1
cellular_component	peroxisome	2 out of 1439 genes, 0.1%	27 out of 9574 genes, 0.3%	1
cellular_component	outer membrane	2 out of 1439 genes, 0.1%	27 out of 9574 genes, 0.3%	1
cellular_component	organelle outer membrane	2 out of 1439 genes, 0.1%	27 out of 9574 genes, 0.3%	1
cellular_component	photosynthetic membrane	7 out of 1439 genes, 0.5%	74 out of 9574 genes, 0.8%	1
cellular_component	ribosome	9 out of 1439 genes, 0.6%	92 out of 9574 genes, 1.0%	1
cellular_component	cytoplasmic membrane-bounded vesicle	3 out of 1439 genes, 0.2%	40 out of 9574 genes, 0.4%	1
cellular_component	proteasome complex	4 out of 1439 genes, 0.3%	51 out of 9574 genes, 0.5%	1
cellular_component	internal side of plasma membrane	2 out of 1439 genes, 0.1%	33 out of 9574 genes, 0.3%	1
cellular_component	extrinsic to plasma membrane	2 out of 1439 genes, 0.1%	33 out of 9574 genes, 0.3%	1
cellular_component	extrinsic to internal side of plasma membrane	2 out of 1439 genes, 0.1%	33 out of 9574 genes, 0.3%	1
cellular_component	extrinsic to membrane	2 out of 1439 genes, 0.1%	34 out of 9574 genes, 0.4%	1
cellular_component	plastid stroma	42 out of 1439 genes, 2.9%	366 out of 9574 genes, 3.8%	1
cellular_component	nuclear envelope	2 out of 1439 genes, 0.1%	41 out of 9574 genes, 0.4%	1
cellular_component	thylakoid part	8 out of 1439 genes, 0.6%	102 out of 9574 genes, 1.1%	1
cellular_component	thylakoid	34 out of 1439 genes, 2.4%	323 out of 9574 genes, 3.4%	1
cellular_component	photosystem	3 out of 1439 genes, 0.2%	56 out of 9574 genes, 0.6%	1
cellular_component	nuclear lumen	22 out of 1439 genes, 1.5%	233 out of 9574 genes, 2.4%	1
cellular_component	organelle lumen	22 out of 1439 genes, 1.5%	233 out of 9574 genes, 2.4%	1
cellular_component	intracellular organelle lumen	22 out of 1439 genes, 1.5%	233 out of 9574 genes, 2.4%	1
cellular_component	organelle inner membrane	16 out of 1439 genes, 1.1%	186 out of 9574 genes, 1.9%	1
cellular_component	membrane-enclosed lumen	22 out of 1439 genes, 1.5%	239 out of 9574 genes, 2.5%	1
cellular_component	Golgi apparatus	2 out of 1439 genes, 0.1%	51 out of 9574 genes, 0.5%	1
cellular_component	Golgi apparatus part	2 out of 1439 genes, 0.1%	51 out of 9574 genes, 0.5%	1
cellular_component	chloroplast thylakoid	25 out of 1439 genes, 1.7%	266 out of 9574 genes, 2.8%	1
cellular_component	chloroplast	31 out of 1439 genes, 2.2%	321 out of 9574 genes, 3.4%	1
cellular_component	ribosomal subunit	2 out of 1439 genes, 0.1%	55 out of 9574 genes, 0.6%	1
cellular_component	plastid thylakoid	26 out of 1439 genes, 1.8%	284 out of 9574 genes, 3.0%	1
cellular_component	organelle subcompartment	26 out of 1439 genes, 1.8%	284 out of 9574 genes, 3.0%	1
cellular_component	organelle membrane	66 out of 1439 genes, 4.6%	608 out of 9574 genes, 6.4%	1
cellular_component	nucleus	27 out of 1439 genes, 1.9%	296 out of 9574 genes, 3.1%	1
cellular_component	organelle envelope	60 out of 1439 genes, 4.2%	563 out of 9574 genes, 5.9%	1
cellular_component	chloroplast part	28 out of 1439 genes, 1.9%	308 out of 9574 genes, 3.2%	1
cellular_component	envelope	60 out of 1439 genes, 4.2%	571 out of 9574 genes, 6.0%	1
cellular_component	nuclear part	24 out of 1439 genes, 1.7%	279 out of 9574 genes, 2.9%	1
cellular_component	plastid part	86 out of 1439 genes, 6.0%	787 out of 9574 genes, 8.2%	1
cellular_component	endomembrane system	10 out of 1439 genes, 0.7%	160 out of 9574 genes, 1.7%	1
cellular_component	mitochondrial envelope	3 out of 1439 genes, 0.2%	88 out of 9574 genes, 0.9%	1
cellular_component	mitochondrial membrane	2 out of 1439 genes, 0.1%	77 out of 9574 genes, 0.8%	1
cellular_component	mitochondrion	5 out of 1439 genes, 0.3%	130 out of 9574 genes, 1.4%	1
cellular_component	mitochondrial part	4 out of 1439 genes, 0.3%	124 out of 9574 genes, 1.3%	1
cellular_component	cullin-RING ubiquitin ligase complex	2 out of 1439 genes, 0.1%	102 out of 9574 genes, 1.1%	1
cellular_component	ubiquitin ligase complex	2 out of 1439 genes, 0.1%	112 out of 9574 genes, 1.2%	1
cellular_component	plastid	203 out of 1439 genes, 14.1%	1831 out of 9574 genes, 19.1%	1
cellular_component	cell	1114 out of 1439 genes, 77.4%	7912 out of 9574 genes, 82.6%	1
cellular_component	cell part	1114 out of 1439 genes, 77.4%	7912 out of 9574 genes, 82.6%	1
cellular_component	ribonucleoprotein complex	25 out of 1439 genes, 1.7%	403 out of 9574 genes, 4.2%	1
cellular_component	cytoplasmic part	361 out of 1439 genes, 25.1%	3016 out of 9574 genes, 31.5%	1
cellular_component	cytoplasm	362 out of 1439 genes, 25.2%	3024 out of 9574 genes, 31.6%	1
cellular_component	protein complex	61 out of 1439 genes, 4.2%	753 out of 9574 genes, 7.9%	1
cellular_component	intracellular	847 out of 1439 genes, 58.9%	6756 out of 9574 genes, 70.6%	1
cellular_component	macromolecular complex	91 out of 1439 genes, 6.3%	1215 out of 9574 genes, 12.7%	1
cellular_component	organelle	757 out of 1439 genes, 52.6%	5962 out of 9574 genes, 62.3%	1
cellular_component	membrane-bounded organelle	652 out of 1439 genes, 45.3%	5407 out of 9574 genes, 56.5%	1
cellular_component	intracellular organelle	746 out of 1439 genes, 51.8%	5874 out of 9574 genes, 61.4%	1
cellular_component	intracellular membrane-bounded organelle	639 out of 1439 genes, 44.4%	5273 out of 9574 genes, 55.1%	1
cellular_component	organelle part	176 out of 1439 genes, 12.2%	1789 out of 9574 genes, 18.7%	1
cellular_component	intracellular part	846 out of 1439 genes, 58.8%	6730 out of 9574 genes, 70.3%	1
cellular_component	intracellular organelle part	149 out of 1439 genes, 10.4%	1552 out of 9574 genes, 16.2%	1
molecular_function	catalytic activity	1737 out of 2350 genes, 73.9%	8776 out of 12888 genes, 68.1%	2.17e-09
molecular_function	transferase activity, transferring glycosyl groups	137 out of 2350 genes, 5.8%	476 out of 12888 genes, 3.7%	2.13e-06
molecular_function	hydrolase activity, acting on glycosyl bonds	130 out of 2350 genes, 5.5%	452 out of 12888 genes, 3.5%	5.48e-06
molecular_function	transferase activity	643 out of 2350 genes, 27.4%	3047 out of 12888 genes, 23.6%	0.00065
molecular_function	transferase activity, transferring hexosyl groups	83 out of 2350 genes, 3.5%	290 out of 12888 genes, 2.3%	0.00259
molecular_function	iron ion binding	102 out of 2350 genes, 4.3%	388 out of 12888 genes, 3.0%	0.01363
molecular_function	kinase activity	271 out of 2350 genes, 11.5%	1207 out of 12888 genes, 9.4%	0.01831
molecular_function	oxidoreductase activity, acting on single donors with incorporation of molecular oxygen	33 out of 2350 genes, 1.4%	94 out of 12888 genes, 0.7%	0.02302
molecular_function	oxidoreductase activity, acting on diphenols and related substances as donors	30 out of 2350 genes, 1.3%	83 out of 12888 genes, 0.6%	0.02622
molecular_function	hydrolase activity, hydrolyzing O-glycosyl compounds	85 out of 2350 genes, 3.6%	320 out of 12888 genes, 2.5%	0.03948
molecular_function	protein kinase activity	208 out of 2350 genes, 8.9%	908 out of 12888 genes, 7.0%	0.04312
molecular_function	oxidoreductase activity	367 out of 2350 genes, 15.6%	1713 out of 12888 genes, 13.3%	0.0553
molecular_function	antioxidant activity	42 out of 2350 genes, 1.8%	135 out of 12888 genes, 1.0%	0.06217
molecular_function	oxidoreductase activity, acting on diphenols and related substances as donors, oxygen as acceptor	26 out of 2350 genes, 1.1%	76 out of 12888 genes, 0.6%	0.20461
molecular_function	phosphotransferase activity, alcohol group as acceptor	213 out of 2350 genes, 9.1%	962 out of 12888 genes, 7.5%	0.26014
molecular_function	carboxypeptidase activity	19 out of 2350 genes, 0.8%	51 out of 12888 genes, 0.4%	0.33486
molecular_function	monooxygenase activity	57 out of 2350 genes, 2.4%	212 out of 12888 genes, 1.6%	0.35473
molecular_function	peroxidase activity	9 out of 2350 genes, 0.4%	19 out of 12888 genes, 0.1%	1
molecular_function	oxidoreductase activity, acting on peroxide as acceptor	9 out of 2350 genes, 0.4%	19 out of 12888 genes, 0.1%	1
molecular_function	carbohydrate binding	27 out of 2350 genes, 1.1%	92 out of 12888 genes, 0.7%	1
molecular_function	carbon-nitrogen lyase activity	11 out of 2350 genes, 0.5%	28 out of 12888 genes, 0.2%	1
molecular_function	glucosidase activity	22 out of 2350 genes, 0.9%	72 out of 12888 genes, 0.6%	1
molecular_function	carboxylesterase activity	37 out of 2350 genes, 1.6%	139 out of 12888 genes, 1.1%	1
molecular_function	beta-glucosidase activity	10 out of 2350 genes, 0.4%	25 out of 12888 genes, 0.2%	1
molecular_function	transition metal ion transmembrane transporter activity	10 out of 2350 genes, 0.4%	25 out of 12888 genes, 0.2%	1
molecular_function	galactosyltransferase activity	12 out of 2350 genes, 0.5%	33 out of 12888 genes, 0.3%	1
molecular_function	carbon-oxygen lyase activity, acting on polysaccharides	7 out of 2350 genes, 0.3%	15 out of 12888 genes, 0.1%	1
molecular_function	carboxylic ester hydrolase activity	37 out of 2350 genes, 1.6%	141 out of 12888 genes, 1.1%	1
molecular_function	O-acyltransferase activity	12 out of 2350 genes, 0.5%	34 out of 12888 genes, 0.3%	1
molecular_function	secondary active transmembrane transporter activity	35 out of 2350 genes, 1.5%	134 out of 12888 genes, 1.0%	1
molecular_function	phospholipase activity	14 out of 2350 genes, 0.6%	43 out of 12888 genes, 0.3%	1
molecular_function	transferase activity, transferring phosphorus-containing groups	308 out of 2350 genes, 13.1%	1527 out of 12888 genes, 11.8%	1
molecular_function	endopeptidase inhibitor activity	5 out of 2350 genes, 0.2%	10 out of 12888 genes, 0.1%	1
molecular_function	peptidase inhibitor activity	5 out of 2350 genes, 0.2%	10 out of 12888 genes, 0.1%	1
molecular_function	UDP-glycosyltransferase activity	43 out of 2350 genes, 1.8%	176 out of 12888 genes, 1.4%	1
molecular_function	polysaccharide binding	7 out of 2350 genes, 0.3%	17 out of 12888 genes, 0.1%	1
molecular_function	dioxygenase activity	29 out of 2350 genes, 1.2%	111 out of 12888 genes, 0.9%	1
molecular_function	histone kinase activity	2 out of 2350 genes, 0.1%	2 out of 12888 genes, 0.0%	1
molecular_function	histone serine kinase activity	2 out of 2350 genes, 0.1%	2 out of 12888 genes, 0.0%	1
molecular_function	oxidoreductase activity, acting on NAD(P)H, oxygen as acceptor	5 out of 2350 genes, 0.2%	11 out of 12888 genes, 0.1%	1
molecular_function	oxidoreductase activity, acting on paired donors, with incorporation or reduction of molecular oxygen	54 out of 2350 genes, 2.3%	236 out of 12888 genes, 1.8%	1
molecular_function	acylglycerol O-acyltransferase activity	6 out of 2350 genes, 0.3%	15 out of 12888 genes, 0.1%	1
molecular_function	oxidoreductase activity, acting on single donors with incorporation of molecular oxygen, incorporation of one atom of oxygen (internal monooxygenases or internal mixed function oxidases)	6 out of 2350 genes, 0.3%	15 out of 12888 genes, 0.1%	1
molecular_function	phosphoenolpyruvate carboxykinase activity	4 out of 2350 genes, 0.2%	8 out of 12888 genes, 0.1%	1
molecular_function	lipase activity	14 out of 2350 genes, 0.6%	48 out of 12888 genes, 0.4%	1
molecular_function	alkylbase DNA N-glycosylase activity	3 out of 2350 genes, 0.1%	5 out of 12888 genes, 0.0%	1
molecular_function	oxidoreductase activity, oxidizing metal ions, oxygen as acceptor	3 out of 2350 genes, 0.1%	5 out of 12888 genes, 0.0%	1
molecular_function	alpha-glucosidase activity	5 out of 2350 genes, 0.2%	12 out of 12888 genes, 0.1%	1
molecular_function	phospholipase C activity	5 out of 2350 genes, 0.2%	12 out of 12888 genes, 0.1%	1
molecular_function	acetylglucosaminyltransferase activity	8 out of 2350 genes, 0.3%	24 out of 12888 genes, 0.2%	1
molecular_function	pattern binding	7 out of 2350 genes, 0.3%	20 out of 12888 genes, 0.2%	1
molecular_function	phosphoric diester hydrolase activity	7 out of 2350 genes, 0.3%	20 out of 12888 genes, 0.2%	1
molecular_function	oxidoreductase activity, acting on paired donors, with incorporation or reduction of molecular oxygen, 2-oxoglutarate as one donor, and incorporation of one atom each of oxygen into both donors	21 out of 2350 genes, 0.9%	82 out of 12888 genes, 0.6%	1
molecular_function	cellulose synthase activity	11 out of 2350 genes, 0.5%	37 out of 12888 genes, 0.3%	1
molecular_function	anion transmembrane transporter activity	17 out of 2350 genes, 0.7%	64 out of 12888 genes, 0.5%	1
molecular_function	ion binding	509 out of 2350 genes, 21.7%	2643 out of 12888 genes, 20.5%	1
molecular_function	receptor binding	7 out of 2350 genes, 0.3%	21 out of 12888 genes, 0.2%	1
molecular_function	anion:anion antiporter activity	3 out of 2350 genes, 0.1%	6 out of 12888 genes, 0.0%	1
molecular_function	oxidoreductase activity, acting on X-H and Y-H to form an X-Y bond	3 out of 2350 genes, 0.1%	6 out of 12888 genes, 0.0%	1
molecular_function	oxidoreductase activity, acting on X-H and Y-H to form an X-Y bond, with oxygen as acceptor	3 out of 2350 genes, 0.1%	6 out of 12888 genes, 0.0%	1
molecular_function	lyase activity	78 out of 2350 genes, 3.3%	368 out of 12888 genes, 2.9%	1
molecular_function	molybdate ion transmembrane transporter activity	2 out of 2350 genes, 0.1%	3 out of 12888 genes, 0.0%	1
molecular_function	serine O-acyltransferase activity	2 out of 2350 genes, 0.1%	3 out of 12888 genes, 0.0%	1
molecular_function	beta-1,4-mannosyltransferase activity	2 out of 2350 genes, 0.1%	3 out of 12888 genes, 0.0%	1
molecular_function	transferase activity, transferring pentosyl groups	10 out of 2350 genes, 0.4%	35 out of 12888 genes, 0.3%	1
molecular_function	peptidase regulator activity	6 out of 2350 genes, 0.3%	18 out of 12888 genes, 0.1%	1
molecular_function	endopeptidase regulator activity	6 out of 2350 genes, 0.3%	18 out of 12888 genes, 0.1%	1
molecular_function	oxidoreductase activity, acting on the CH-CH group of donors, NAD or NADP as acceptor	52 out of 2350 genes, 2.2%	240 out of 12888 genes, 1.9%	1
molecular_function	transferase activity, transferring acyl groups	59 out of 2350 genes, 2.5%	276 out of 12888 genes, 2.1%	1
molecular_function	organic phosphonate transmembrane transporter activity	9 out of 2350 genes, 0.4%	32 out of 12888 genes, 0.2%	1
molecular_function	GDP-dissociation inhibitor activity	3 out of 2350 genes, 0.1%	7 out of 12888 genes, 0.1%	1
molecular_function	oxidoreductase activity, oxidizing metal ions	3 out of 2350 genes, 0.1%	7 out of 12888 genes, 0.1%	1
molecular_function	protein kinase regulator activity	3 out of 2350 genes, 0.1%	7 out of 12888 genes, 0.1%	1
molecular_function	enzyme inhibitor activity	5 out of 2350 genes, 0.2%	15 out of 12888 genes, 0.1%	1
molecular_function	oxidosqualene cyclase activity	5 out of 2350 genes, 0.2%	15 out of 12888 genes, 0.1%	1
molecular_function	protein serine/threonine kinase activity	57 out of 2350 genes, 2.4%	270 out of 12888 genes, 2.1%	1
molecular_function	active transmembrane transporter activity	70 out of 2350 genes, 3.0%	338 out of 12888 genes, 2.6%	1
molecular_function	oxidoreductase activity, acting on the CH-CH group of donors	60 out of 2350 genes, 2.6%	288 out of 12888 genes, 2.2%	1
molecular_function	inorganic anion transmembrane transporter activity	8 out of 2350 genes, 0.3%	29 out of 12888 genes, 0.2%	1
molecular_function	oxidoreductase activity, acting on single donors with incorporation of molecular oxygen, incorporation of two atoms of oxygen	8 out of 2350 genes, 0.3%	29 out of 12888 genes, 0.2%	1
molecular_function	transmembrane transporter activity	154 out of 2350 genes, 6.6%	783 out of 12888 genes, 6.1%	1
molecular_function	receptor signaling protein serine/threonine kinase activity	19 out of 2350 genes, 0.8%	82 out of 12888 genes, 0.6%	1
molecular_function	receptor signaling protein activity	19 out of 2350 genes, 0.8%	82 out of 12888 genes, 0.6%	1
molecular_function	oxidoreductase activity, acting on paired donors, with incorporation or reduction of molecular oxygen, reduced iron-sulfur protein as one donor, and incorporation of one atom of oxygen	2 out of 2350 genes, 0.1%	4 out of 12888 genes, 0.0%	1
molecular_function	UDP-galactosyltransferase activity	6 out of 2350 genes, 0.3%	21 out of 12888 genes, 0.2%	1
molecular_function	galactosidase activity	10 out of 2350 genes, 0.4%	40 out of 12888 genes, 0.3%	1
molecular_function	glucosyltransferase activity	27 out of 2350 genes, 1.1%	124 out of 12888 genes, 1.0%	1
molecular_function	enzyme regulator activity	30 out of 2350 genes, 1.3%	140 out of 12888 genes, 1.1%	1
molecular_function	metal ion transmembrane transporter activity	23 out of 2350 genes, 1.0%	106 out of 12888 genes, 0.8%	1
molecular_function	water transmembrane transporter activity	3 out of 2350 genes, 0.1%	9 out of 12888 genes, 0.1%	1
molecular_function	kinase regulator activity	3 out of 2350 genes, 0.1%	9 out of 12888 genes, 0.1%	1
molecular_function	inositol phosphate phosphatase activity	3 out of 2350 genes, 0.1%	9 out of 12888 genes, 0.1%	1
molecular_function	amine transmembrane transporter activity	8 out of 2350 genes, 0.3%	32 out of 12888 genes, 0.2%	1
molecular_function	GTP cyclohydrolase activity	2 out of 2350 genes, 0.1%	5 out of 12888 genes, 0.0%	1
molecular_function	C-acetyltransferase activity	2 out of 2350 genes, 0.1%	5 out of 12888 genes, 0.0%	1
molecular_function	oxidoreductase activity, acting on a sulfur group of donors, NAD(P) as acceptor	2 out of 2350 genes, 0.1%	5 out of 12888 genes, 0.0%	1
molecular_function	myosin binding	2 out of 2350 genes, 0.1%	5 out of 12888 genes, 0.0%	1
molecular_function	myosin tail binding	2 out of 2350 genes, 0.1%	5 out of 12888 genes, 0.0%	1
molecular_function	myosin heavy chain binding	2 out of 2350 genes, 0.1%	5 out of 12888 genes, 0.0%	1
molecular_function	exopeptidase activity	21 out of 2350 genes, 0.9%	98 out of 12888 genes, 0.8%	1
molecular_function	cytoskeletal protein binding	19 out of 2350 genes, 0.8%	88 out of 12888 genes, 0.7%	1
molecular_function	metal ion binding	409 out of 2350 genes, 17.4%	2182 out of 12888 genes, 16.9%	1
molecular_function	endopeptidase activity	51 out of 2350 genes, 2.2%	256 out of 12888 genes, 2.0%	1
molecular_function	double-stranded DNA binding	6 out of 2350 genes, 0.3%	24 out of 12888 genes, 0.2%	1
molecular_function	transferase activity, transferring acyl groups other than amino-acyl groups	49 out of 2350 genes, 2.1%	246 out of 12888 genes, 1.9%	1
molecular_function	carbon-oxygen lyase activity	27 out of 2350 genes, 1.1%	131 out of 12888 genes, 1.0%	1
molecular_function	oxidoreductase activity, acting on paired donors, with incorporation or reduction of molecular oxygen, NAD(P)H as one donor, and incorporation of one atom of oxygen	20 out of 2350 genes, 0.9%	95 out of 12888 genes, 0.7%	1
molecular_function	transaminase activity	12 out of 2350 genes, 0.5%	55 out of 12888 genes, 0.4%	1
molecular_function	ligase activity, forming carbon-sulfur bonds	7 out of 2350 genes, 0.3%	30 out of 12888 genes, 0.2%	1
molecular_function	O-methyltransferase activity	8 out of 2350 genes, 0.3%	35 out of 12888 genes, 0.3%	1
molecular_function	hexosaminidase activity	2 out of 2350 genes, 0.1%	6 out of 12888 genes, 0.0%	1
molecular_function	inositol trisphosphate phosphatase activity	2 out of 2350 genes, 0.1%	6 out of 12888 genes, 0.0%	1
molecular_function	peptidase activity	89 out of 2350 genes, 3.8%	464 out of 12888 genes, 3.6%	1
molecular_function	phospholipid binding	11 out of 2350 genes, 0.5%	51 out of 12888 genes, 0.4%	1
molecular_function	carboxylic acid binding	10 out of 2350 genes, 0.4%	46 out of 12888 genes, 0.4%	1
molecular_function	C-acyltransferase activity	3 out of 2350 genes, 0.1%	11 out of 12888 genes, 0.1%	1
molecular_function	DNA N-glycosylase activity	3 out of 2350 genes, 0.1%	11 out of 12888 genes, 0.1%	1
molecular_function	ribonuclease activity	7 out of 2350 genes, 0.3%	31 out of 12888 genes, 0.2%	1
molecular_function	cofactor binding	82 out of 2350 genes, 3.5%	429 out of 12888 genes, 3.3%	1
molecular_function	carbon-sulfur lyase activity	13 out of 2350 genes, 0.6%	62 out of 12888 genes, 0.5%	1
molecular_function	cation binding	453 out of 2350 genes, 19.3%	2443 out of 12888 genes, 19.0%	1
molecular_function	hydrolase activity	514 out of 2350 genes, 21.9%	2778 out of 12888 genes, 21.6%	1
molecular_function	anion binding	10 out of 2350 genes, 0.4%	47 out of 12888 genes, 0.4%	1
molecular_function	transferase activity, transferring nitrogenous groups	13 out of 2350 genes, 0.6%	63 out of 12888 genes, 0.5%	1
molecular_function	organic acid transmembrane transporter activity	8 out of 2350 genes, 0.3%	37 out of 12888 genes, 0.3%	1
molecular_function	iron-sulfur cluster binding	12 out of 2350 genes, 0.5%	58 out of 12888 genes, 0.5%	1
molecular_function	antiporter activity	6 out of 2350 genes, 0.3%	27 out of 12888 genes, 0.2%	1
molecular_function	CoA-ligase activity	5 out of 2350 genes, 0.2%	22 out of 12888 genes, 0.2%	1
molecular_function	transporter activity	172 out of 2350 genes, 7.3%	921 out of 12888 genes, 7.1%	1
molecular_function	protein serine/threonine/tyrosine kinase activity	2 out of 2350 genes, 0.1%	7 out of 12888 genes, 0.1%	1
molecular_function	organic acid:sodium symporter activity	2 out of 2350 genes, 0.1%	7 out of 12888 genes, 0.1%	1
molecular_function	solute:sodium symporter activity	2 out of 2350 genes, 0.1%	7 out of 12888 genes, 0.1%	1
molecular_function	xylosyltransferase activity	2 out of 2350 genes, 0.1%	7 out of 12888 genes, 0.1%	1
molecular_function	oxidoreductase activity, acting on paired donors, with incorporation or reduction of molecular oxygen, reduced flavin or flavoprotein as one donor, and incorporation of one atom of oxygen	4 out of 2350 genes, 0.2%	17 out of 12888 genes, 0.1%	1
molecular_function	hydroxymethyl-, formyl- and related transferase activity	4 out of 2350 genes, 0.2%	17 out of 12888 genes, 0.1%	1
molecular_function	oxidoreductase activity, acting on the CH-OH group of donors, oxygen as acceptor	3 out of 2350 genes, 0.1%	12 out of 12888 genes, 0.1%	1
molecular_function	L-tyrosine aminotransferase activity	3 out of 2350 genes, 0.1%	12 out of 12888 genes, 0.1%	1
molecular_function	endoribonuclease activity	5 out of 2350 genes, 0.2%	23 out of 12888 genes, 0.2%	1
molecular_function	steroid dehydrogenase activity, acting on the CH-OH group of donors, NAD or NADP as acceptor	5 out of 2350 genes, 0.2%	23 out of 12888 genes, 0.2%	1
molecular_function	motor activity	15 out of 2350 genes, 0.6%	76 out of 12888 genes, 0.6%	1
molecular_function	amino acid transmembrane transporter activity	4 out of 2350 genes, 0.2%	18 out of 12888 genes, 0.1%	1
molecular_function	hydrolase activity, hydrolyzing N-glycosyl compounds	4 out of 2350 genes, 0.2%	18 out of 12888 genes, 0.1%	1
molecular_function	peptidase activity, acting on L-amino acid peptides	84 out of 2350 genes, 3.6%	450 out of 12888 genes, 3.5%	1
molecular_function	actin binding	3 out of 2350 genes, 0.1%	13 out of 12888 genes, 0.1%	1
molecular_function	amine-lyase activity	3 out of 2350 genes, 0.1%	13 out of 12888 genes, 0.1%	1
molecular_function	transition metal ion binding	286 out of 2350 genes, 12.2%	1554 out of 12888 genes, 12.1%	1
molecular_function	sodium ion transmembrane transporter activity	2 out of 2350 genes, 0.1%	8 out of 12888 genes, 0.1%	1
molecular_function	nucleobase transmembrane transporter activity	2 out of 2350 genes, 0.1%	8 out of 12888 genes, 0.1%	1
molecular_function	oxidoreductase activity, acting on the aldehyde or oxo group of donors, oxygen as acceptor	2 out of 2350 genes, 0.1%	8 out of 12888 genes, 0.1%	1
molecular_function	hydrolase activity, acting on ether bonds	2 out of 2350 genes, 0.1%	8 out of 12888 genes, 0.1%	1
molecular_function	copper-transporting ATPase activity	2 out of 2350 genes, 0.1%	8 out of 12888 genes, 0.1%	1
molecular_function	phosphate transmembrane transporter activity	2 out of 2350 genes, 0.1%	8 out of 12888 genes, 0.1%	1
molecular_function	carboxylic acid transmembrane transporter activity	5 out of 2350 genes, 0.2%	24 out of 12888 genes, 0.2%	1
molecular_function	nucleic acid binding transcription factor activity	65 out of 2350 genes, 2.8%	352 out of 12888 genes, 2.7%	1
molecular_function	coenzyme binding	28 out of 2350 genes, 1.2%	150 out of 12888 genes, 1.2%	1
molecular_function	nucleoside kinase activity	3 out of 2350 genes, 0.1%	14 out of 12888 genes, 0.1%	1
molecular_function	steroid dehydrogenase activity	5 out of 2350 genes, 0.2%	25 out of 12888 genes, 0.2%	1
molecular_function	mannosyltransferase activity	2 out of 2350 genes, 0.1%	9 out of 12888 genes, 0.1%	1
molecular_function	C-methyltransferase activity	2 out of 2350 genes, 0.1%	9 out of 12888 genes, 0.1%	1
molecular_function	fatty acid ligase activity	2 out of 2350 genes, 0.1%	9 out of 12888 genes, 0.1%	1
molecular_function	transferase activity, transferring amino-acyl groups	2 out of 2350 genes, 0.1%	9 out of 12888 genes, 0.1%	1
molecular_function	cyclohydrolase activity	2 out of 2350 genes, 0.1%	9 out of 12888 genes, 0.1%	1
molecular_function	carboxy-lyase activity	13 out of 2350 genes, 0.6%	70 out of 12888 genes, 0.5%	1
molecular_function	organic anion transmembrane transporter activity	5 out of 2350 genes, 0.2%	26 out of 12888 genes, 0.2%	1
molecular_function	mannosidase activity	5 out of 2350 genes, 0.2%	26 out of 12888 genes, 0.2%	1
molecular_function	alkali metal ion binding	3 out of 2350 genes, 0.1%	15 out of 12888 genes, 0.1%	1
molecular_function	ion transmembrane transporter activity	75 out of 2350 genes, 3.2%	413 out of 12888 genes, 3.2%	1
molecular_function	molecular transducer activity	54 out of 2350 genes, 2.3%	298 out of 12888 genes, 2.3%	1
molecular_function	tubulin binding	4 out of 2350 genes, 0.2%	21 out of 12888 genes, 0.2%	1
molecular_function	nucleobase-containing compound transmembrane transporter activity	4 out of 2350 genes, 0.2%	21 out of 12888 genes, 0.2%	1
molecular_function	transferase activity, transferring aldehyde or ketonic groups	4 out of 2350 genes, 0.2%	21 out of 12888 genes, 0.2%	1
molecular_function	lipid binding	13 out of 2350 genes, 0.6%	72 out of 12888 genes, 0.6%	1
molecular_function	nucleotide diphosphatase activity	2 out of 2350 genes, 0.1%	10 out of 12888 genes, 0.1%	1
molecular_function	carbohydrate derivative transporter activity	2 out of 2350 genes, 0.1%	10 out of 12888 genes, 0.1%	1
molecular_function	peptide transporter activity	3 out of 2350 genes, 0.1%	16 out of 12888 genes, 0.1%	1
molecular_function	oxidoreductase activity, acting on paired donors, with oxidation of a pair of donors resulting in the reduction of molecular oxygen to two molecules of water	3 out of 2350 genes, 0.1%	16 out of 12888 genes, 0.1%	1
molecular_function	identical protein binding	7 out of 2350 genes, 0.3%	39 out of 12888 genes, 0.3%	1
molecular_function	solute:cation symporter activity	4 out of 2350 genes, 0.2%	22 out of 12888 genes, 0.2%	1
molecular_function	oxidoreductase activity, acting on the CH-CH group of donors, oxygen as acceptor	4 out of 2350 genes, 0.2%	22 out of 12888 genes, 0.2%	1
molecular_function	signal transducer activity	45 out of 2350 genes, 1.9%	255 out of 12888 genes, 2.0%	1
molecular_function	alpha-mannosidase activity	2 out of 2350 genes, 0.1%	11 out of 12888 genes, 0.1%	1
molecular_function	copper ion transmembrane transporter activity	2 out of 2350 genes, 0.1%	11 out of 12888 genes, 0.1%	1
molecular_function	mannosyl-oligosaccharide mannosidase activity	2 out of 2350 genes, 0.1%	11 out of 12888 genes, 0.1%	1
molecular_function	CoA hydrolase activity	2 out of 2350 genes, 0.1%	11 out of 12888 genes, 0.1%	1
molecular_function	aldo-keto reductase (NADP) activity	3 out of 2350 genes, 0.1%	17 out of 12888 genes, 0.1%	1
molecular_function	hydrolase activity, acting on carbon-nitrogen (but not peptide) bonds, in cyclic amidines	3 out of 2350 genes, 0.1%	17 out of 12888 genes, 0.1%	1
molecular_function	endoribonuclease activity, producing 5'-phosphomonoesters	3 out of 2350 genes, 0.1%	17 out of 12888 genes, 0.1%	1
molecular_function	symporter activity	4 out of 2350 genes, 0.2%	23 out of 12888 genes, 0.2%	1
molecular_function	structure-specific DNA binding	7 out of 2350 genes, 0.3%	41 out of 12888 genes, 0.3%	1
molecular_function	oxidoreductase activity, acting on NAD(P)H	16 out of 2350 genes, 0.7%	94 out of 12888 genes, 0.7%	1
molecular_function	endonuclease activity	5 out of 2350 genes, 0.2%	30 out of 12888 genes, 0.2%	1
molecular_function	endonuclease activity, active with either ribo- or deoxyribonucleic acids and producing 5'-phosphomonoesters	3 out of 2350 genes, 0.1%	18 out of 12888 genes, 0.1%	1
molecular_function	UDP-glucosyltransferase activity	13 out of 2350 genes, 0.6%	77 out of 12888 genes, 0.6%	1
molecular_function	small conjugating protein ligase activity	18 out of 2350 genes, 0.8%	106 out of 12888 genes, 0.8%	1
molecular_function	phosphofructokinase activity	2 out of 2350 genes, 0.1%	12 out of 12888 genes, 0.1%	1
molecular_function	oxidoreductase activity, acting on a sulfur group of donors, disulfide as acceptor	2 out of 2350 genes, 0.1%	12 out of 12888 genes, 0.1%	1
molecular_function	NADH dehydrogenase activity	5 out of 2350 genes, 0.2%	31 out of 12888 genes, 0.2%	1
molecular_function	NADH dehydrogenase (quinone) activity	5 out of 2350 genes, 0.2%	31 out of 12888 genes, 0.2%	1
molecular_function	protein dimerization activity	4 out of 2350 genes, 0.2%	25 out of 12888 genes, 0.2%	1
molecular_function	racemase and epimerase activity, acting on carbohydrates and derivatives	3 out of 2350 genes, 0.1%	19 out of 12888 genes, 0.1%	1
molecular_function	hydrolase activity, acting on carbon-nitrogen (but not peptide) bonds, in linear amides	7 out of 2350 genes, 0.3%	44 out of 12888 genes, 0.3%	1
molecular_function	cation:sugar symporter activity	2 out of 2350 genes, 0.1%	13 out of 12888 genes, 0.1%	1
molecular_function	hydro-lyase activity	12 out of 2350 genes, 0.5%	74 out of 12888 genes, 0.6%	1
molecular_function	kinase binding	3 out of 2350 genes, 0.1%	20 out of 12888 genes, 0.2%	1
molecular_function	ion channel activity	11 out of 2350 genes, 0.5%	69 out of 12888 genes, 0.5%	1
molecular_function	substrate-specific channel activity	11 out of 2350 genes, 0.5%	69 out of 12888 genes, 0.5%	1
molecular_function	inorganic cation transmembrane transporter activity	28 out of 2350 genes, 1.2%	169 out of 12888 genes, 1.3%	1
molecular_function	hydrolase activity, acting on ester bonds	121 out of 2350 genes, 5.1%	698 out of 12888 genes, 5.4%	1
molecular_function	racemase and epimerase activity	4 out of 2350 genes, 0.2%	27 out of 12888 genes, 0.2%	1
molecular_function	substrate-specific transmembrane transporter activity	95 out of 2350 genes, 4.0%	552 out of 12888 genes, 4.3%	1
molecular_function	oxidoreductase activity, acting on NAD(P)H, quinone or similar compound as acceptor	8 out of 2350 genes, 0.3%	52 out of 12888 genes, 0.4%	1
molecular_function	cation channel activity	6 out of 2350 genes, 0.3%	40 out of 12888 genes, 0.3%	1
molecular_function	solute:cation antiporter activity	3 out of 2350 genes, 0.1%	21 out of 12888 genes, 0.2%	1
molecular_function	carbohydrate kinase activity	3 out of 2350 genes, 0.1%	21 out of 12888 genes, 0.2%	1
molecular_function	oxidoreductase activity, acting on the CH-OH group of donors, NAD or NADP as acceptor	30 out of 2350 genes, 1.3%	183 out of 12888 genes, 1.4%	1
molecular_function	channel activity	11 out of 2350 genes, 0.5%	71 out of 12888 genes, 0.6%	1
molecular_function	passive transmembrane transporter activity	11 out of 2350 genes, 0.5%	71 out of 12888 genes, 0.6%	1
molecular_function	fatty acid synthase activity	4 out of 2350 genes, 0.2%	28 out of 12888 genes, 0.2%	1
molecular_function	protein kinase binding	2 out of 2350 genes, 0.1%	15 out of 12888 genes, 0.1%	1
molecular_function	acid-amino acid ligase activity	20 out of 2350 genes, 0.9%	128 out of 12888 genes, 1.0%	1
molecular_function	cation transmembrane transporter activity	46 out of 2350 genes, 2.0%	281 out of 12888 genes, 2.2%	1
molecular_function	carbon-carbon lyase activity	17 out of 2350 genes, 0.7%	111 out of 12888 genes, 0.9%	1
molecular_function	oxidoreductase activity, acting on CH-OH group of donors	36 out of 2350 genes, 1.5%	224 out of 12888 genes, 1.7%	1
molecular_function	primary active transmembrane transporter activity	27 out of 2350 genes, 1.1%	172 out of 12888 genes, 1.3%	1
molecular_function	P-P-bond-hydrolysis-driven transmembrane transporter activity	27 out of 2350 genes, 1.1%	172 out of 12888 genes, 1.3%	1
molecular_function	carbohydrate phosphatase activity	3 out of 2350 genes, 0.1%	24 out of 12888 genes, 0.2%	1
molecular_function	solute:hydrogen antiporter activity	2 out of 2350 genes, 0.1%	17 out of 12888 genes, 0.1%	1
molecular_function	hydrolase activity, acting on acid anhydrides, catalyzing transmembrane movement of substances	22 out of 2350 genes, 0.9%	145 out of 12888 genes, 1.1%	1
molecular_function	phosphotransferase activity, phosphate group as acceptor	2 out of 2350 genes, 0.1%	18 out of 12888 genes, 0.1%	1
molecular_function	tetrapyrrole binding	2 out of 2350 genes, 0.1%	18 out of 12888 genes, 0.1%	1
molecular_function	transcription factor binding transcription factor activity	4 out of 2350 genes, 0.2%	33 out of 12888 genes, 0.3%	1
molecular_function	nucleobase-containing compound kinase activity	3 out of 2350 genes, 0.1%	26 out of 12888 genes, 0.2%	1
molecular_function	thiolester hydrolase activity	6 out of 2350 genes, 0.3%	47 out of 12888 genes, 0.4%	1
molecular_function	hydrogen ion transmembrane transporter activity	9 out of 2350 genes, 0.4%	67 out of 12888 genes, 0.5%	1
molecular_function	protein tyrosine kinase activity	13 out of 2350 genes, 0.6%	93 out of 12888 genes, 0.7%	1
molecular_function	ATPase activity, coupled to transmembrane movement of ions, phosphorylative mechanism	3 out of 2350 genes, 0.1%	27 out of 12888 genes, 0.2%	1
molecular_function	voltage-gated ion channel activity	2 out of 2350 genes, 0.1%	20 out of 12888 genes, 0.2%	1
molecular_function	voltage-gated channel activity	2 out of 2350 genes, 0.1%	20 out of 12888 genes, 0.2%	1
molecular_function	calmodulin-dependent protein kinase activity	3 out of 2350 genes, 0.1%	28 out of 12888 genes, 0.2%	1
molecular_function	potassium channel activity	3 out of 2350 genes, 0.1%	28 out of 12888 genes, 0.2%	1
molecular_function	transferase activity, transferring alkyl or aryl (other than methyl) groups	12 out of 2350 genes, 0.5%	89 out of 12888 genes, 0.7%	1
molecular_function	metal cluster binding	12 out of 2350 genes, 0.5%	89 out of 12888 genes, 0.7%	1
molecular_function	amylase activity	2 out of 2350 genes, 0.1%	21 out of 12888 genes, 0.2%	1
molecular_function	sugar transmembrane transporter activity	2 out of 2350 genes, 0.1%	21 out of 12888 genes, 0.2%	1
molecular_function	enzyme activator activity	3 out of 2350 genes, 0.1%	29 out of 12888 genes, 0.2%	1
molecular_function	potassium ion transmembrane transporter activity	3 out of 2350 genes, 0.1%	29 out of 12888 genes, 0.2%	1
molecular_function	oxidoreductase activity, acting on a sulfur group of donors	12 out of 2350 genes, 0.5%	91 out of 12888 genes, 0.7%	1
molecular_function	oxidoreductase activity, acting on the aldehyde or oxo group of donors	9 out of 2350 genes, 0.4%	72 out of 12888 genes, 0.6%	1
molecular_function	intramolecular transferase activity	8 out of 2350 genes, 0.3%	66 out of 12888 genes, 0.5%	1
molecular_function	S-adenosylmethionine-dependent methyltransferase activity	7 out of 2350 genes, 0.3%	60 out of 12888 genes, 0.5%	1
molecular_function	small GTPase regulator activity	6 out of 2350 genes, 0.3%	53 out of 12888 genes, 0.4%	1
molecular_function	GTPase activator activity	2 out of 2350 genes, 0.1%	23 out of 12888 genes, 0.2%	1
molecular_function	Ras GTPase activator activity	2 out of 2350 genes, 0.1%	23 out of 12888 genes, 0.2%	1
molecular_function	hydrolase activity, acting on carbon-nitrogen (but not peptide) bonds	10 out of 2350 genes, 0.4%	81 out of 12888 genes, 0.6%	1
molecular_function	protein binding transcription factor activity	4 out of 2350 genes, 0.2%	39 out of 12888 genes, 0.3%	1
molecular_function	ATPase activity, coupled to transmembrane movement of substances	19 out of 2350 genes, 0.8%	140 out of 12888 genes, 1.1%	1
molecular_function	phosphoric ester hydrolase activity	48 out of 2350 genes, 2.0%	319 out of 12888 genes, 2.5%	1
molecular_function	acetyltransferase activity	9 out of 2350 genes, 0.4%	75 out of 12888 genes, 0.6%	1
molecular_function	ATPase activity, coupled to movement of substances	19 out of 2350 genes, 0.8%	141 out of 12888 genes, 1.1%	1
molecular_function	vitamin binding	4 out of 2350 genes, 0.2%	40 out of 12888 genes, 0.3%	1
molecular_function	methyltransferase activity	28 out of 2350 genes, 1.2%	199 out of 12888 genes, 1.5%	1
molecular_function	transferase activity, transferring one-carbon groups	49 out of 2350 genes, 2.1%	328 out of 12888 genes, 2.5%	1
molecular_function	disulfide oxidoreductase activity	7 out of 2350 genes, 0.3%	63 out of 12888 genes, 0.5%	1
molecular_function	GTPase regulator activity	6 out of 2350 genes, 0.3%	56 out of 12888 genes, 0.4%	1
molecular_function	nucleoside-triphosphatase regulator activity	6 out of 2350 genes, 0.3%	56 out of 12888 genes, 0.4%	1
molecular_function	transferase activity, transferring sulfur-containing groups	2 out of 2350 genes, 0.1%	25 out of 12888 genes, 0.2%	1
molecular_function	gated channel activity	2 out of 2350 genes, 0.1%	25 out of 12888 genes, 0.2%	1
molecular_function	ion gated channel activity	2 out of 2350 genes, 0.1%	25 out of 12888 genes, 0.2%	1
molecular_function	substrate-specific transporter activity	103 out of 2350 genes, 4.4%	652 out of 12888 genes, 5.1%	1
molecular_function	ATPase activity, coupled to transmembrane movement of ions	12 out of 2350 genes, 0.5%	98 out of 12888 genes, 0.8%	1
molecular_function	cation-transporting ATPase activity	7 out of 2350 genes, 0.3%	65 out of 12888 genes, 0.5%	1
molecular_function	protein binding	120 out of 2350 genes, 5.1%	757 out of 12888 genes, 5.9%	1
molecular_function	oxidoreductase activity, acting on the CH-NH2 group of donors, oxygen as acceptor	2 out of 2350 genes, 0.1%	27 out of 12888 genes, 0.2%	1
molecular_function	oxidoreductase activity, acting on the CH-NH group of donors	2 out of 2350 genes, 0.1%	27 out of 12888 genes, 0.2%	1
molecular_function	DNA polymerase activity	2 out of 2350 genes, 0.1%	27 out of 12888 genes, 0.2%	1
molecular_function	monovalent inorganic cation transmembrane transporter activity	17 out of 2350 genes, 0.7%	135 out of 12888 genes, 1.0%	1
molecular_function	aminoacyl-tRNA ligase activity	9 out of 2350 genes, 0.4%	81 out of 12888 genes, 0.6%	1
molecular_function	receptor activity	3 out of 2350 genes, 0.1%	37 out of 12888 genes, 0.3%	1
molecular_function	DNA binding	46 out of 2350 genes, 2.0%	322 out of 12888 genes, 2.5%	1
molecular_function	isomerase activity	35 out of 2350 genes, 1.5%	254 out of 12888 genes, 2.0%	1
molecular_function	adenyl ribonucleotide binding	264 out of 2350 genes, 11.2%	1606 out of 12888 genes, 12.5%	1
molecular_function	adenyl nucleotide binding	264 out of 2350 genes, 11.2%	1607 out of 12888 genes, 12.5%	1
molecular_function	enzyme binding	6 out of 2350 genes, 0.3%	63 out of 12888 genes, 0.5%	1
molecular_function	oxidoreductase activity, acting on the CH-NH2 group of donors	4 out of 2350 genes, 0.2%	48 out of 12888 genes, 0.4%	1
molecular_function	phosphoprotein phosphatase activity	14 out of 2350 genes, 0.6%	122 out of 12888 genes, 0.9%	1
molecular_function	phosphatase activity	38 out of 2350 genes, 1.6%	280 out of 12888 genes, 2.2%	1
molecular_function	N-acyltransferase activity	4 out of 2350 genes, 0.2%	49 out of 12888 genes, 0.4%	1
molecular_function	carbohydrate transmembrane transporter activity	2 out of 2350 genes, 0.1%	32 out of 12888 genes, 0.2%	1
molecular_function	carbohydrate transporter activity	2 out of 2350 genes, 0.1%	32 out of 12888 genes, 0.2%	1
molecular_function	cis-trans isomerase activity	5 out of 2350 genes, 0.2%	58 out of 12888 genes, 0.5%	1
molecular_function	nuclease activity	12 out of 2350 genes, 0.5%	111 out of 12888 genes, 0.9%	1
molecular_function	N-methyltransferase activity	2 out of 2350 genes, 0.1%	33 out of 12888 genes, 0.3%	1
molecular_function	helicase activity	3 out of 2350 genes, 0.1%	43 out of 12888 genes, 0.3%	1
molecular_function	ligase activity, forming carbon-oxygen bonds	9 out of 2350 genes, 0.4%	93 out of 12888 genes, 0.7%	1
molecular_function	ligase activity, forming aminoacyl-tRNA and related compounds	9 out of 2350 genes, 0.4%	93 out of 12888 genes, 0.7%	1
molecular_function	ligase activity, forming carbon-nitrogen bonds	24 out of 2350 genes, 1.0%	206 out of 12888 genes, 1.6%	1
molecular_function	nucleotide binding	380 out of 2350 genes, 16.2%	2333 out of 12888 genes, 18.1%	1
molecular_function	nucleoside phosphate binding	380 out of 2350 genes, 16.2%	2333 out of 12888 genes, 18.1%	1
molecular_function	N-acetyltransferase activity	2 out of 2350 genes, 0.1%	42 out of 12888 genes, 0.3%	1
molecular_function	oxidoreductase activity, acting on the aldehyde or oxo group of donors, NAD or NADP as acceptor	2 out of 2350 genes, 0.1%	43 out of 12888 genes, 0.3%	1
molecular_function	small molecule binding	385 out of 2350 genes, 16.4%	2393 out of 12888 genes, 18.6%	1
molecular_function	ribonucleotide binding	284 out of 2350 genes, 12.1%	1819 out of 12888 genes, 14.1%	1
molecular_function	purine ribonucleotide binding	284 out of 2350 genes, 12.1%	1819 out of 12888 genes, 14.1%	1
molecular_function	purine nucleotide binding	284 out of 2350 genes, 12.1%	1820 out of 12888 genes, 14.1%	1
molecular_function	guanyl nucleotide binding	22 out of 2350 genes, 0.9%	221 out of 12888 genes, 1.7%	1
molecular_function	guanyl ribonucleotide binding	22 out of 2350 genes, 0.9%	221 out of 12888 genes, 1.7%	1
molecular_function	ligase activity	41 out of 2350 genes, 1.7%	360 out of 12888 genes, 2.8%	1
molecular_function	RNA polymerase activity	3 out of 2350 genes, 0.1%	73 out of 12888 genes, 0.6%	1
molecular_function	ATPase activity, coupled	31 out of 2350 genes, 1.3%	311 out of 12888 genes, 2.4%	1
molecular_function	nucleoside-triphosphatase activity	96 out of 2350 genes, 4.1%	751 out of 12888 genes, 5.8%	1
molecular_function	translation factor activity, nucleic acid binding	6 out of 2350 genes, 0.3%	117 out of 12888 genes, 0.9%	1
molecular_function	ATPase activity	32 out of 2350 genes, 1.4%	331 out of 12888 genes, 2.6%	1
molecular_function	hydrolase activity, acting on acid anhydrides	106 out of 2350 genes, 4.5%	839 out of 12888 genes, 6.5%	1
molecular_function	pyrophosphatase activity	103 out of 2350 genes, 4.4%	824 out of 12888 genes, 6.4%	1
molecular_function	hydrolase activity, acting on acid anhydrides, in phosphorus-containing anhydrides	103 out of 2350 genes, 4.4%	828 out of 12888 genes, 6.4%	1
molecular_function	nucleotidyltransferase activity	9 out of 2350 genes, 0.4%	161 out of 12888 genes, 1.2%	1
molecular_function	RNA binding	18 out of 2350 genes, 0.8%	254 out of 12888 genes, 2.0%	1
molecular_function	binding	1293 out of 2350 genes, 55.0%	7740 out of 12888 genes, 60.1%	1
molecular_function	organic cyclic compound binding	548 out of 2350 genes, 23.3%	3655 out of 12888 genes, 28.4%	1
molecular_function	nucleic acid binding	186 out of 2350 genes, 7.9%	1465 out of 12888 genes, 11.4%	1
molecular_function	heterocyclic compound binding	547 out of 2350 genes, 23.3%	3652 out of 12888 genes, 28.3%	1
molecular_function	structural molecule activity	15 out of 2350 genes, 0.6%	298 out of 12888 genes, 2.3%	1
biological_process	programmed cell death	25 out of 1851 genes, 1.4%	61 out of 10716 genes, 0.6%	0.00765
biological_process	L-phenylalanine metabolic process	10 out of 1851 genes, 0.5%	15 out of 10716 genes, 0.1%	0.02135
biological_process	cell death	25 out of 1851 genes, 1.4%	65 out of 10716 genes, 0.6%	0.02791
biological_process	death	25 out of 1851 genes, 1.4%	65 out of 10716 genes, 0.6%	0.02791
biological_process	aromatic amino acid family metabolic process	15 out of 1851 genes, 0.8%	34 out of 10716 genes, 0.3%	0.16881
biological_process	aminoglycan metabolic process	12 out of 1851 genes, 0.6%	24 out of 10716 genes, 0.2%	0.16934
biological_process	aminoglycan catabolic process	11 out of 1851 genes, 0.6%	21 out of 10716 genes, 0.2%	0.1832
biological_process	glucan metabolic process	41 out of 1851 genes, 2.2%	143 out of 10716 genes, 1.3%	0.33248
biological_process	response to stimulus	445 out of 1851 genes, 24.0%	2264 out of 10716 genes, 21.1%	0.33677
biological_process	polysaccharide metabolic process	51 out of 1851 genes, 2.8%	194 out of 10716 genes, 1.8%	0.6922
biological_process	transition metal ion transport	20 out of 1851 genes, 1.1%	58 out of 10716 genes, 0.5%	0.83598
biological_process	secondary metabolic process	45 out of 1851 genes, 2.4%	168 out of 10716 genes, 1.6%	0.88741
biological_process	phenylpropanoid metabolic process	40 out of 1851 genes, 2.2%	146 out of 10716 genes, 1.4%	1
biological_process	drug transport	17 out of 1851 genes, 0.9%	47 out of 10716 genes, 0.4%	1
biological_process	response to drug	17 out of 1851 genes, 0.9%	47 out of 10716 genes, 0.4%	1
biological_process	carbohydrate derivative catabolic process	12 out of 1851 genes, 0.6%	29 out of 10716 genes, 0.3%	1
biological_process	response to stress	209 out of 1851 genes, 11.3%	1014 out of 10716 genes, 9.5%	1
biological_process	hydrogen peroxide metabolic process	10 out of 1851 genes, 0.5%	23 out of 10716 genes, 0.2%	1
biological_process	external encapsulating structure organization	41 out of 1851 genes, 2.2%	158 out of 10716 genes, 1.5%	1
biological_process	steroid hormone mediated signaling pathway	10 out of 1851 genes, 0.5%	24 out of 10716 genes, 0.2%	1
biological_process	response to steroid hormone stimulus	10 out of 1851 genes, 0.5%	24 out of 10716 genes, 0.2%	1
biological_process	cellular response to steroid hormone stimulus	10 out of 1851 genes, 0.5%	24 out of 10716 genes, 0.2%	1
biological_process	peptide transport	14 out of 1851 genes, 0.8%	40 out of 10716 genes, 0.4%	1
biological_process	secondary metabolite biosynthetic process	27 out of 1851 genes, 1.5%	96 out of 10716 genes, 0.9%	1
biological_process	phenylpropanoid biosynthetic process	26 out of 1851 genes, 1.4%	92 out of 10716 genes, 0.9%	1
biological_process	amide transport	14 out of 1851 genes, 0.8%	41 out of 10716 genes, 0.4%	1
biological_process	single-organism biosynthetic process	69 out of 1851 genes, 3.7%	302 out of 10716 genes, 2.8%	1
biological_process	zinc ion transport	6 out of 1851 genes, 0.3%	12 out of 10716 genes, 0.1%	1
biological_process	lipid localization	16 out of 1851 genes, 0.9%	52 out of 10716 genes, 0.5%	1
biological_process	fatty acid biosynthetic process	15 out of 1851 genes, 0.8%	49 out of 10716 genes, 0.5%	1
biological_process	response to boron-containing substance	2 out of 1851 genes, 0.1%	2 out of 10716 genes, 0.0%	1
biological_process	histone phosphorylation	2 out of 1851 genes, 0.1%	2 out of 10716 genes, 0.0%	1
biological_process	peptidyl-serine phosphorylation	2 out of 1851 genes, 0.1%	2 out of 10716 genes, 0.0%	1
biological_process	peptidyl-serine modification	2 out of 1851 genes, 0.1%	2 out of 10716 genes, 0.0%	1
biological_process	histone-serine phosphorylation	2 out of 1851 genes, 0.1%	2 out of 10716 genes, 0.0%	1
biological_process	fluid transport	2 out of 1851 genes, 0.1%	2 out of 10716 genes, 0.0%	1
biological_process	monocarboxylic acid biosynthetic process	15 out of 1851 genes, 0.8%	53 out of 10716 genes, 0.5%	1
biological_process	jasmonic acid metabolic process	6 out of 1851 genes, 0.3%	15 out of 10716 genes, 0.1%	1
biological_process	polyol metabolic process	8 out of 1851 genes, 0.4%	23 out of 10716 genes, 0.2%	1
biological_process	response to oomycetes	4 out of 1851 genes, 0.2%	8 out of 10716 genes, 0.1%	1
biological_process	carbohydrate metabolic process	96 out of 1851 genes, 5.2%	470 out of 10716 genes, 4.4%	1
biological_process	negative regulation of molecular function	14 out of 1851 genes, 0.8%	50 out of 10716 genes, 0.5%	1
biological_process	nucleosome organization	12 out of 1851 genes, 0.6%	41 out of 10716 genes, 0.4%	1
biological_process	cell wall organization	17 out of 1851 genes, 0.9%	64 out of 10716 genes, 0.6%	1
biological_process	lipid biosynthetic process	30 out of 1851 genes, 1.6%	128 out of 10716 genes, 1.2%	1
biological_process	protein-DNA complex subunit organization	12 out of 1851 genes, 0.6%	42 out of 10716 genes, 0.4%	1
biological_process	cell wall organization or biogenesis	24 out of 1851 genes, 1.3%	99 out of 10716 genes, 0.9%	1
biological_process	cellular response to lipid	13 out of 1851 genes, 0.7%	47 out of 10716 genes, 0.4%	1
biological_process	reactive oxygen species metabolic process	11 out of 1851 genes, 0.6%	38 out of 10716 genes, 0.4%	1
biological_process	ion transport	89 out of 1851 genes, 4.8%	439 out of 10716 genes, 4.1%	1
biological_process	immune effector process	4 out of 1851 genes, 0.2%	9 out of 10716 genes, 0.1%	1
biological_process	divalent inorganic cation homeostasis	4 out of 1851 genes, 0.2%	9 out of 10716 genes, 0.1%	1
biological_process	cation transport	60 out of 1851 genes, 3.2%	285 out of 10716 genes, 2.7%	1
biological_process	cellular response to organic cyclic compound	12 out of 1851 genes, 0.6%	43 out of 10716 genes, 0.4%	1
biological_process	steroid metabolic process	10 out of 1851 genes, 0.5%	34 out of 10716 genes, 0.3%	1
biological_process	cellular response to starvation	15 out of 1851 genes, 0.8%	57 out of 10716 genes, 0.5%	1
biological_process	response to starvation	15 out of 1851 genes, 0.8%	57 out of 10716 genes, 0.5%	1
biological_process	copper ion transport	6 out of 1851 genes, 0.3%	17 out of 10716 genes, 0.2%	1
biological_process	lignin metabolic process	13 out of 1851 genes, 0.7%	48 out of 10716 genes, 0.4%	1
biological_process	hormone metabolic process	9 out of 1851 genes, 0.5%	30 out of 10716 genes, 0.3%	1
biological_process	response to biotic stimulus	37 out of 1851 genes, 2.0%	168 out of 10716 genes, 1.6%	1
biological_process	nitrogen compound transport	31 out of 1851 genes, 1.7%	138 out of 10716 genes, 1.3%	1
biological_process	organic acid biosynthetic process	38 out of 1851 genes, 2.1%	174 out of 10716 genes, 1.6%	1
biological_process	carboxylic acid biosynthetic process	38 out of 1851 genes, 2.1%	174 out of 10716 genes, 1.6%	1
biological_process	metal ion transport	37 out of 1851 genes, 2.0%	169 out of 10716 genes, 1.6%	1
biological_process	cell recognition	7 out of 1851 genes, 0.4%	22 out of 10716 genes, 0.2%	1
biological_process	glucan biosynthetic process	14 out of 1851 genes, 0.8%	54 out of 10716 genes, 0.5%	1
biological_process	response to lipid	14 out of 1851 genes, 0.8%	54 out of 10716 genes, 0.5%	1
biological_process	L-serine metabolic process	6 out of 1851 genes, 0.3%	18 out of 10716 genes, 0.2%	1
biological_process	indole-containing compound metabolic process	6 out of 1851 genes, 0.3%	18 out of 10716 genes, 0.2%	1
biological_process	response to disaccharide stimulus	5 out of 1851 genes, 0.3%	14 out of 10716 genes, 0.1%	1
biological_process	organonitrogen compound catabolic process	13 out of 1851 genes, 0.7%	50 out of 10716 genes, 0.5%	1
biological_process	purine nucleobase transport	2 out of 1851 genes, 0.1%	3 out of 10716 genes, 0.0%	1
biological_process	apoptotic process	2 out of 1851 genes, 0.1%	3 out of 10716 genes, 0.0%	1
biological_process	ER-nucleus signaling pathway	2 out of 1851 genes, 0.1%	3 out of 10716 genes, 0.0%	1
biological_process	peptide biosynthetic process	2 out of 1851 genes, 0.1%	3 out of 10716 genes, 0.0%	1
biological_process	amide biosynthetic process	2 out of 1851 genes, 0.1%	3 out of 10716 genes, 0.0%	1
biological_process	alcohol metabolic process	15 out of 1851 genes, 0.8%	60 out of 10716 genes, 0.6%	1
biological_process	organic hydroxy compound metabolic process	15 out of 1851 genes, 0.8%	60 out of 10716 genes, 0.6%	1
biological_process	response to organic cyclic compound	12 out of 1851 genes, 0.6%	46 out of 10716 genes, 0.4%	1
biological_process	response to carbohydrate stimulus	18 out of 1851 genes, 1.0%	76 out of 10716 genes, 0.7%	1
biological_process	leaf morphogenesis	3 out of 1851 genes, 0.2%	7 out of 10716 genes, 0.1%	1
biological_process	cell wall polysaccharide metabolic process	3 out of 1851 genes, 0.2%	7 out of 10716 genes, 0.1%	1
biological_process	purine-containing compound salvage	3 out of 1851 genes, 0.2%	7 out of 10716 genes, 0.1%	1
biological_process	cell wall macromolecule metabolic process	3 out of 1851 genes, 0.2%	7 out of 10716 genes, 0.1%	1
biological_process	cellular response to nutrient levels	15 out of 1851 genes, 0.8%	63 out of 10716 genes, 0.6%	1
biological_process	embryo development ending in seed dormancy	5 out of 1851 genes, 0.3%	16 out of 10716 genes, 0.1%	1
biological_process	cellular carbohydrate biosynthetic process	16 out of 1851 genes, 0.9%	69 out of 10716 genes, 0.6%	1
biological_process	tryptophan metabolic process	4 out of 1851 genes, 0.2%	12 out of 10716 genes, 0.1%	1
biological_process	indolalkylamine metabolic process	4 out of 1851 genes, 0.2%	12 out of 10716 genes, 0.1%	1
biological_process	alditol metabolic process	4 out of 1851 genes, 0.2%	12 out of 10716 genes, 0.1%	1
biological_process	response to reactive oxygen species	6 out of 1851 genes, 0.3%	21 out of 10716 genes, 0.2%	1
biological_process	glycerol-3-phosphate metabolic process	2 out of 1851 genes, 0.1%	4 out of 10716 genes, 0.0%	1
biological_process	acetyl-CoA biosynthetic process	2 out of 1851 genes, 0.1%	4 out of 10716 genes, 0.0%	1
biological_process	manganese ion transport	2 out of 1851 genes, 0.1%	4 out of 10716 genes, 0.0%	1
biological_process	purine nucleobase biosynthetic process	2 out of 1851 genes, 0.1%	4 out of 10716 genes, 0.0%	1
biological_process	proteasomal protein catabolic process	2 out of 1851 genes, 0.1%	4 out of 10716 genes, 0.0%	1
biological_process	thioester biosynthetic process	2 out of 1851 genes, 0.1%	4 out of 10716 genes, 0.0%	1
biological_process	purine nucleobase salvage	2 out of 1851 genes, 0.1%	4 out of 10716 genes, 0.0%	1
biological_process	proteasomal ubiquitin-dependent protein catabolic process	2 out of 1851 genes, 0.1%	4 out of 10716 genes, 0.0%	1
biological_process	acyl-CoA biosynthetic process	2 out of 1851 genes, 0.1%	4 out of 10716 genes, 0.0%	1
biological_process	response to other organism	30 out of 1851 genes, 1.6%	144 out of 10716 genes, 1.3%	1
biological_process	cellular response to extracellular stimulus	15 out of 1851 genes, 0.8%	66 out of 10716 genes, 0.6%	1
biological_process	cellular response to external stimulus	15 out of 1851 genes, 0.8%	66 out of 10716 genes, 0.6%	1
biological_process	serine family amino acid metabolic process	11 out of 1851 genes, 0.6%	46 out of 10716 genes, 0.4%	1
biological_process	response to nutrient levels	16 out of 1851 genes, 0.9%	72 out of 10716 genes, 0.7%	1
biological_process	cellular polysaccharide biosynthetic process	15 out of 1851 genes, 0.8%	67 out of 10716 genes, 0.6%	1
biological_process	gas transport	4 out of 1851 genes, 0.2%	13 out of 10716 genes, 0.1%	1
biological_process	amine transport	4 out of 1851 genes, 0.2%	13 out of 10716 genes, 0.1%	1
biological_process	polysaccharide catabolic process	5 out of 1851 genes, 0.3%	18 out of 10716 genes, 0.2%	1
biological_process	riboflavin metabolic process	3 out of 1851 genes, 0.2%	9 out of 10716 genes, 0.1%	1
biological_process	nucleobase biosynthetic process	3 out of 1851 genes, 0.2%	9 out of 10716 genes, 0.1%	1
biological_process	organelle fission	3 out of 1851 genes, 0.2%	9 out of 10716 genes, 0.1%	1
biological_process	leaf development	3 out of 1851 genes, 0.2%	9 out of 10716 genes, 0.1%	1
biological_process	response to UV	9 out of 1851 genes, 0.5%	38 out of 10716 genes, 0.4%	1
biological_process	regulation of response to biotic stimulus	2 out of 1851 genes, 0.1%	5 out of 10716 genes, 0.0%	1
biological_process	inositol metabolic process	2 out of 1851 genes, 0.1%	5 out of 10716 genes, 0.0%	1
biological_process	triterpenoid metabolic process	2 out of 1851 genes, 0.1%	5 out of 10716 genes, 0.0%	1
biological_process	cell adhesion	2 out of 1851 genes, 0.1%	5 out of 10716 genes, 0.0%	1
biological_process	triterpenoid biosynthetic process	2 out of 1851 genes, 0.1%	5 out of 10716 genes, 0.0%	1
biological_process	biological adhesion	2 out of 1851 genes, 0.1%	5 out of 10716 genes, 0.0%	1
biological_process	vitamin E metabolic process	2 out of 1851 genes, 0.1%	5 out of 10716 genes, 0.0%	1
biological_process	polyol biosynthetic process	2 out of 1851 genes, 0.1%	5 out of 10716 genes, 0.0%	1
biological_process	response to light stimulus	40 out of 1851 genes, 2.2%	204 out of 10716 genes, 1.9%	1
biological_process	interspecies interaction between organisms	4 out of 1851 genes, 0.2%	14 out of 10716 genes, 0.1%	1
biological_process	response to extracellular stimulus	16 out of 1851 genes, 0.9%	75 out of 10716 genes, 0.7%	1
biological_process	anion transport	22 out of 1851 genes, 1.2%	107 out of 10716 genes, 1.0%	1
biological_process	one-carbon metabolic process	43 out of 1851 genes, 2.3%	221 out of 10716 genes, 2.1%	1
biological_process	response to light intensity	9 out of 1851 genes, 0.5%	39 out of 10716 genes, 0.4%	1
biological_process	sulfur amino acid biosynthetic process	8 out of 1851 genes, 0.4%	34 out of 10716 genes, 0.3%	1
biological_process	response to oxidative stress	7 out of 1851 genes, 0.4%	29 out of 10716 genes, 0.3%	1
biological_process	inorganic anion transport	11 out of 1851 genes, 0.6%	50 out of 10716 genes, 0.5%	1
biological_process	small molecule biosynthetic process	50 out of 1851 genes, 2.7%	262 out of 10716 genes, 2.4%	1
biological_process	sesquiterpenoid metabolic process	3 out of 1851 genes, 0.2%	10 out of 10716 genes, 0.1%	1
biological_process	phytosteroid metabolic process	3 out of 1851 genes, 0.2%	10 out of 10716 genes, 0.1%	1
biological_process	chemical homeostasis	19 out of 1851 genes, 1.0%	93 out of 10716 genes, 0.9%	1
biological_process	organ morphogenesis	12 out of 1851 genes, 0.6%	56 out of 10716 genes, 0.5%	1
biological_process	carbohydrate biosynthetic process	16 out of 1851 genes, 0.9%	78 out of 10716 genes, 0.7%	1
biological_process	polysaccharide biosynthetic process	15 out of 1851 genes, 0.8%	73 out of 10716 genes, 0.7%	1
biological_process	response to oxygen-containing compound	28 out of 1851 genes, 1.5%	144 out of 10716 genes, 1.3%	1
biological_process	nuclear division	2 out of 1851 genes, 0.1%	6 out of 10716 genes, 0.1%	1
biological_process	mitosis	2 out of 1851 genes, 0.1%	6 out of 10716 genes, 0.1%	1
biological_process	toxin metabolic process	2 out of 1851 genes, 0.1%	6 out of 10716 genes, 0.1%	1
biological_process	cytokinin metabolic process	2 out of 1851 genes, 0.1%	6 out of 10716 genes, 0.1%	1
biological_process	hemicellulose metabolic process	2 out of 1851 genes, 0.1%	6 out of 10716 genes, 0.1%	1
biological_process	glucuronoxylan metabolic process	2 out of 1851 genes, 0.1%	6 out of 10716 genes, 0.1%	1
biological_process	inositol phosphate metabolic process	2 out of 1851 genes, 0.1%	6 out of 10716 genes, 0.1%	1
biological_process	xylan metabolic process	2 out of 1851 genes, 0.1%	6 out of 10716 genes, 0.1%	1
biological_process	membrane lipid biosynthetic process	2 out of 1851 genes, 0.1%	6 out of 10716 genes, 0.1%	1
biological_process	interaction with host	2 out of 1851 genes, 0.1%	6 out of 10716 genes, 0.1%	1
biological_process	alditol phosphate metabolic process	2 out of 1851 genes, 0.1%	6 out of 10716 genes, 0.1%	1
biological_process	plant-type cell wall organization or biogenesis	7 out of 1851 genes, 0.4%	31 out of 10716 genes, 0.3%	1
biological_process	post-embryonic morphogenesis	6 out of 1851 genes, 0.3%	26 out of 10716 genes, 0.2%	1
biological_process	cellular hormone metabolic process	3 out of 1851 genes, 0.2%	11 out of 10716 genes, 0.1%	1
biological_process	flavin-containing compound metabolic process	3 out of 1851 genes, 0.2%	11 out of 10716 genes, 0.1%	1
biological_process	hormone-mediated signaling pathway	29 out of 1851 genes, 1.6%	151 out of 10716 genes, 1.4%	1
biological_process	cellular response to hormone stimulus	29 out of 1851 genes, 1.6%	151 out of 10716 genes, 1.4%	1
biological_process	cellular response to endogenous stimulus	29 out of 1851 genes, 1.6%	151 out of 10716 genes, 1.4%	1
biological_process	sulfur compound biosynthetic process	8 out of 1851 genes, 0.4%	37 out of 10716 genes, 0.3%	1
biological_process	cellular response to stress	38 out of 1851 genes, 2.1%	202 out of 10716 genes, 1.9%	1
biological_process	embryo development	6 out of 1851 genes, 0.3%	27 out of 10716 genes, 0.3%	1
biological_process	xylem and phloem pattern formation	5 out of 1851 genes, 0.3%	22 out of 10716 genes, 0.2%	1
biological_process	amine metabolic process	10 out of 1851 genes, 0.5%	49 out of 10716 genes, 0.5%	1
biological_process	response to abiotic stimulus	110 out of 1851 genes, 5.9%	612 out of 10716 genes, 5.7%	1
biological_process	response to fungus	4 out of 1851 genes, 0.2%	17 out of 10716 genes, 0.2%	1
biological_process	auxin metabolic process	4 out of 1851 genes, 0.2%	17 out of 10716 genes, 0.2%	1
biological_process	defense response to fungus	4 out of 1851 genes, 0.2%	17 out of 10716 genes, 0.2%	1
biological_process	DNA methylation	3 out of 1851 genes, 0.2%	12 out of 10716 genes, 0.1%	1
biological_process	protein folding	3 out of 1851 genes, 0.2%	12 out of 10716 genes, 0.1%	1
biological_process	thiamine metabolic process	3 out of 1851 genes, 0.2%	12 out of 10716 genes, 0.1%	1
biological_process	response to hexose stimulus	3 out of 1851 genes, 0.2%	12 out of 10716 genes, 0.1%	1
biological_process	plant-type cell wall biogenesis	3 out of 1851 genes, 0.2%	12 out of 10716 genes, 0.1%	1
biological_process	pollen wall assembly	3 out of 1851 genes, 0.2%	12 out of 10716 genes, 0.1%	1
biological_process	cellular component assembly involved in morphogenesis	3 out of 1851 genes, 0.2%	12 out of 10716 genes, 0.1%	1
biological_process	response to monosaccharide stimulus	3 out of 1851 genes, 0.2%	12 out of 10716 genes, 0.1%	1
biological_process	regulation of ion transport	3 out of 1851 genes, 0.2%	12 out of 10716 genes, 0.1%	1
biological_process	DNA methylation or demethylation	3 out of 1851 genes, 0.2%	12 out of 10716 genes, 0.1%	1
biological_process	regulation of carbohydrate metabolic process	2 out of 1851 genes, 0.1%	7 out of 10716 genes, 0.1%	1
biological_process	nucleobase transport	2 out of 1851 genes, 0.1%	7 out of 10716 genes, 0.1%	1
biological_process	fatty acid metabolic process	34 out of 1851 genes, 1.8%	183 out of 10716 genes, 1.7%	1
biological_process	sulfur amino acid metabolic process	8 out of 1851 genes, 0.4%	39 out of 10716 genes, 0.4%	1
biological_process	cellular biogenic amine metabolic process	8 out of 1851 genes, 0.4%	39 out of 10716 genes, 0.4%	1
biological_process	response to chemical stimulus	153 out of 1851 genes, 8.3%	862 out of 10716 genes, 8.0%	1
biological_process	cellular metal ion homeostasis	4 out of 1851 genes, 0.2%	18 out of 10716 genes, 0.2%	1
biological_process	cellular amine metabolic process	8 out of 1851 genes, 0.4%	40 out of 10716 genes, 0.4%	1
biological_process	iron ion transport	3 out of 1851 genes, 0.2%	13 out of 10716 genes, 0.1%	1
biological_process	phospholipid biosynthetic process	3 out of 1851 genes, 0.2%	13 out of 10716 genes, 0.1%	1
biological_process	thiamine-containing compound metabolic process	3 out of 1851 genes, 0.2%	13 out of 10716 genes, 0.1%	1
biological_process	symbiosis, encompassing mutualism through parasitism	3 out of 1851 genes, 0.2%	13 out of 10716 genes, 0.1%	1
biological_process	ion homeostasis	14 out of 1851 genes, 0.8%	74 out of 10716 genes, 0.7%	1
biological_process	response to organic substance	90 out of 1851 genes, 4.9%	508 out of 10716 genes, 4.7%	1
biological_process	karyogamy	2 out of 1851 genes, 0.1%	8 out of 10716 genes, 0.1%	1
biological_process	acetyl-CoA metabolic process	2 out of 1851 genes, 0.1%	8 out of 10716 genes, 0.1%	1
biological_process	purine nucleobase metabolic process	2 out of 1851 genes, 0.1%	8 out of 10716 genes, 0.1%	1
biological_process	response to toxic substance	2 out of 1851 genes, 0.1%	8 out of 10716 genes, 0.1%	1
biological_process	abscisic acid metabolic process	2 out of 1851 genes, 0.1%	8 out of 10716 genes, 0.1%	1
biological_process	chlorophyll biosynthetic process	2 out of 1851 genes, 0.1%	8 out of 10716 genes, 0.1%	1
biological_process	copper ion transmembrane transport	2 out of 1851 genes, 0.1%	8 out of 10716 genes, 0.1%	1
biological_process	apocarotenoid metabolic process	2 out of 1851 genes, 0.1%	8 out of 10716 genes, 0.1%	1
biological_process	phosphatidylcholine metabolic process	2 out of 1851 genes, 0.1%	8 out of 10716 genes, 0.1%	1
biological_process	cellular amino acid biosynthetic process	22 out of 1851 genes, 1.2%	120 out of 10716 genes, 1.1%	1
biological_process	steroid biosynthetic process	4 out of 1851 genes, 0.2%	19 out of 10716 genes, 0.2%	1
biological_process	single-organism transport	146 out of 1851 genes, 7.9%	832 out of 10716 genes, 7.8%	1
biological_process	enzyme linked receptor protein signaling pathway	7 out of 1851 genes, 0.4%	36 out of 10716 genes, 0.3%	1
biological_process	DNA repair	17 out of 1851 genes, 0.9%	93 out of 10716 genes, 0.9%	1
biological_process	response to external stimulus	24 out of 1851 genes, 1.3%	133 out of 10716 genes, 1.2%	1
biological_process	cell proliferation	3 out of 1851 genes, 0.2%	14 out of 10716 genes, 0.1%	1
biological_process	post-embryonic root morphogenesis	3 out of 1851 genes, 0.2%	14 out of 10716 genes, 0.1%	1
biological_process	regulation of localization	3 out of 1851 genes, 0.2%	14 out of 10716 genes, 0.1%	1
biological_process	regulation of growth	3 out of 1851 genes, 0.2%	14 out of 10716 genes, 0.1%	1
biological_process	regulation of transport	3 out of 1851 genes, 0.2%	14 out of 10716 genes, 0.1%	1
biological_process	cellular carbohydrate metabolic process	32 out of 1851 genes, 1.7%	179 out of 10716 genes, 1.7%	1
biological_process	microtubule-based process	15 out of 1851 genes, 0.8%	82 out of 10716 genes, 0.8%	1
biological_process	cell communication	93 out of 1851 genes, 5.0%	531 out of 10716 genes, 5.0%	1
biological_process	plant-type cell wall organization	4 out of 1851 genes, 0.2%	20 out of 10716 genes, 0.2%	1
biological_process	metal ion homeostasis	4 out of 1851 genes, 0.2%	20 out of 10716 genes, 0.2%	1
biological_process	response to radiation	50 out of 1851 genes, 2.7%	284 out of 10716 genes, 2.7%	1
biological_process	cellular glucan metabolic process	19 out of 1851 genes, 1.0%	106 out of 10716 genes, 1.0%	1
biological_process	monocarboxylic acid metabolic process	44 out of 1851 genes, 2.4%	250 out of 10716 genes, 2.3%	1
biological_process	phyllome development	12 out of 1851 genes, 0.6%	66 out of 10716 genes, 0.6%	1
biological_process	peptide metabolic process	2 out of 1851 genes, 0.1%	9 out of 10716 genes, 0.1%	1
biological_process	acyl-CoA metabolic process	2 out of 1851 genes, 0.1%	9 out of 10716 genes, 0.1%	1
biological_process	nucleoside diphosphate metabolic process	2 out of 1851 genes, 0.1%	9 out of 10716 genes, 0.1%	1
biological_process	thioester metabolic process	2 out of 1851 genes, 0.1%	9 out of 10716 genes, 0.1%	1
biological_process	ethanolamine-containing compound metabolic process	2 out of 1851 genes, 0.1%	9 out of 10716 genes, 0.1%	1
biological_process	organelle fusion	2 out of 1851 genes, 0.1%	9 out of 10716 genes, 0.1%	1
biological_process	lipid metabolic process	77 out of 1851 genes, 4.2%	441 out of 10716 genes, 4.1%	1
biological_process	response to DNA damage stimulus	17 out of 1851 genes, 0.9%	95 out of 10716 genes, 0.9%	1
biological_process	localization	295 out of 1851 genes, 15.9%	1702 out of 10716 genes, 15.9%	1
biological_process	epidermis development	7 out of 1851 genes, 0.4%	38 out of 10716 genes, 0.4%	1
biological_process	regulation of phosphate metabolic process	7 out of 1851 genes, 0.4%	38 out of 10716 genes, 0.4%	1
biological_process	regulation of phosphorus metabolic process	7 out of 1851 genes, 0.4%	38 out of 10716 genes, 0.4%	1
biological_process	plant-type cell wall modification	3 out of 1851 genes, 0.2%	15 out of 10716 genes, 0.1%	1
biological_process	alcohol biosynthetic process	4 out of 1851 genes, 0.2%	21 out of 10716 genes, 0.2%	1
biological_process	organic hydroxy compound biosynthetic process	4 out of 1851 genes, 0.2%	21 out of 10716 genes, 0.2%	1
biological_process	sexual reproduction	5 out of 1851 genes, 0.3%	27 out of 10716 genes, 0.3%	1
biological_process	cation homeostasis	11 out of 1851 genes, 0.6%	62 out of 10716 genes, 0.6%	1
biological_process	regulation of molecular function	17 out of 1851 genes, 0.9%	97 out of 10716 genes, 0.9%	1
biological_process	phospholipid metabolic process	13 out of 1851 genes, 0.7%	74 out of 10716 genes, 0.7%	1
biological_process	defense response	34 out of 1851 genes, 1.8%	197 out of 10716 genes, 1.8%	1
biological_process	response to red or far red light	11 out of 1851 genes, 0.6%	63 out of 10716 genes, 0.6%	1
biological_process	regulation of hormone levels	11 out of 1851 genes, 0.6%	63 out of 10716 genes, 0.6%	1
biological_process	anthocyanin-containing compound biosynthetic process	2 out of 1851 genes, 0.1%	10 out of 10716 genes, 0.1%	1
biological_process	lateral root morphogenesis	2 out of 1851 genes, 0.1%	10 out of 10716 genes, 0.1%	1
biological_process	carbon fixation	2 out of 1851 genes, 0.1%	10 out of 10716 genes, 0.1%	1
biological_process	anthocyanin-containing compound metabolic process	2 out of 1851 genes, 0.1%	10 out of 10716 genes, 0.1%	1
biological_process	protein maturation	2 out of 1851 genes, 0.1%	10 out of 10716 genes, 0.1%	1
biological_process	cellular response to stimulus	118 out of 1851 genes, 6.4%	686 out of 10716 genes, 6.4%	1
biological_process	nucleotide-sugar metabolic process	3 out of 1851 genes, 0.2%	16 out of 10716 genes, 0.1%	1
biological_process	fruit development	5 out of 1851 genes, 0.3%	28 out of 10716 genes, 0.3%	1
biological_process	seed development	5 out of 1851 genes, 0.3%	28 out of 10716 genes, 0.3%	1
biological_process	homeostatic process	34 out of 1851 genes, 1.8%	200 out of 10716 genes, 1.9%	1
biological_process	water-soluble vitamin metabolic process	6 out of 1851 genes, 0.3%	35 out of 10716 genes, 0.3%	1
biological_process	epidermal cell differentiation	6 out of 1851 genes, 0.3%	35 out of 10716 genes, 0.3%	1
biological_process	root morphogenesis	7 out of 1851 genes, 0.4%	41 out of 10716 genes, 0.4%	1
biological_process	regulation of nucleotide metabolic process	5 out of 1851 genes, 0.3%	29 out of 10716 genes, 0.3%	1
biological_process	cellular response to organic substance	31 out of 1851 genes, 1.7%	183 out of 10716 genes, 1.7%	1
biological_process	unidimensional cell growth	4 out of 1851 genes, 0.2%	23 out of 10716 genes, 0.2%	1
biological_process	developmental growth involved in morphogenesis	4 out of 1851 genes, 0.2%	23 out of 10716 genes, 0.2%	1
biological_process	shoot system morphogenesis	3 out of 1851 genes, 0.2%	17 out of 10716 genes, 0.2%	1
biological_process	sucrose metabolic process	2 out of 1851 genes, 0.1%	11 out of 10716 genes, 0.1%	1
biological_process	G-protein coupled receptor signaling pathway	2 out of 1851 genes, 0.1%	11 out of 10716 genes, 0.1%	1
biological_process	chlorophyll metabolic process	2 out of 1851 genes, 0.1%	11 out of 10716 genes, 0.1%	1
biological_process	negative regulation of catalytic activity	2 out of 1851 genes, 0.1%	11 out of 10716 genes, 0.1%	1
biological_process	negative regulation of hydrolase activity	2 out of 1851 genes, 0.1%	11 out of 10716 genes, 0.1%	1
biological_process	carbohydrate derivative transport	2 out of 1851 genes, 0.1%	11 out of 10716 genes, 0.1%	1
biological_process	protein modification by small protein conjugation	20 out of 1851 genes, 1.1%	119 out of 10716 genes, 1.1%	1
biological_process	organic anion transport	9 out of 1851 genes, 0.5%	54 out of 10716 genes, 0.5%	1
biological_process	sulfur compound metabolic process	14 out of 1851 genes, 0.8%	84 out of 10716 genes, 0.8%	1
biological_process	cellular ion homeostasis	8 out of 1851 genes, 0.4%	48 out of 10716 genes, 0.4%	1
biological_process	cellular chemical homeostasis	8 out of 1851 genes, 0.4%	48 out of 10716 genes, 0.4%	1
biological_process	disaccharide metabolic process	7 out of 1851 genes, 0.4%	42 out of 10716 genes, 0.4%	1
biological_process	response to abscisic acid stimulus	4 out of 1851 genes, 0.2%	24 out of 10716 genes, 0.2%	1
biological_process	transport	256 out of 1851 genes, 13.8%	1503 out of 10716 genes, 14.0%	1
biological_process	nucleobase metabolic process	3 out of 1851 genes, 0.2%	18 out of 10716 genes, 0.2%	1
biological_process	abscisic acid mediated signaling pathway	3 out of 1851 genes, 0.2%	18 out of 10716 genes, 0.2%	1
biological_process	cellular response to abscisic acid stimulus	3 out of 1851 genes, 0.2%	18 out of 10716 genes, 0.2%	1
biological_process	cellular response to alcohol	3 out of 1851 genes, 0.2%	18 out of 10716 genes, 0.2%	1
biological_process	oligosaccharide metabolic process	7 out of 1851 genes, 0.4%	43 out of 10716 genes, 0.4%	1
biological_process	signal transduction	77 out of 1851 genes, 4.2%	459 out of 10716 genes, 4.3%	1
biological_process	single organism signaling	77 out of 1851 genes, 4.2%	459 out of 10716 genes, 4.3%	1
biological_process	amino acid transport	6 out of 1851 genes, 0.3%	37 out of 10716 genes, 0.3%	1
biological_process	post-embryonic root development	6 out of 1851 genes, 0.3%	37 out of 10716 genes, 0.3%	1
biological_process	microtubule cytoskeleton organization	2 out of 1851 genes, 0.1%	12 out of 10716 genes, 0.1%	1
biological_process	glycogen metabolic process	2 out of 1851 genes, 0.1%	12 out of 10716 genes, 0.1%	1
biological_process	(1->3)-beta-D-glucan metabolic process	2 out of 1851 genes, 0.1%	12 out of 10716 genes, 0.1%	1
biological_process	energy reserve metabolic process	2 out of 1851 genes, 0.1%	12 out of 10716 genes, 0.1%	1
biological_process	RNA localization	2 out of 1851 genes, 0.1%	12 out of 10716 genes, 0.1%	1
biological_process	RNA export from nucleus	2 out of 1851 genes, 0.1%	12 out of 10716 genes, 0.1%	1
biological_process	phloem or xylem histogenesis	2 out of 1851 genes, 0.1%	12 out of 10716 genes, 0.1%	1
biological_process	lipid modification	2 out of 1851 genes, 0.1%	12 out of 10716 genes, 0.1%	1
biological_process	nucleic acid transport	2 out of 1851 genes, 0.1%	12 out of 10716 genes, 0.1%	1
biological_process	RNA transport	2 out of 1851 genes, 0.1%	12 out of 10716 genes, 0.1%	1
biological_process	nuclear export	2 out of 1851 genes, 0.1%	12 out of 10716 genes, 0.1%	1
biological_process	establishment of RNA localization	2 out of 1851 genes, 0.1%	12 out of 10716 genes, 0.1%	1
biological_process	beta-glucan metabolic process	2 out of 1851 genes, 0.1%	12 out of 10716 genes, 0.1%	1
biological_process	pigment biosynthetic process	10 out of 1851 genes, 0.5%	62 out of 10716 genes, 0.6%	1
biological_process	cell wall modification	4 out of 1851 genes, 0.2%	25 out of 10716 genes, 0.2%	1
biological_process	response to alcohol	4 out of 1851 genes, 0.2%	25 out of 10716 genes, 0.2%	1
biological_process	cellular polysaccharide metabolic process	20 out of 1851 genes, 1.1%	123 out of 10716 genes, 1.1%	1
biological_process	cellular cation homeostasis	7 out of 1851 genes, 0.4%	44 out of 10716 genes, 0.4%	1
biological_process	establishment of localization	280 out of 1851 genes, 15.1%	1652 out of 10716 genes, 15.4%	1
biological_process	trehalose metabolic process	3 out of 1851 genes, 0.2%	19 out of 10716 genes, 0.2%	1
biological_process	meiosis I	3 out of 1851 genes, 0.2%	19 out of 10716 genes, 0.2%	1
biological_process	chloroplast organization	3 out of 1851 genes, 0.2%	19 out of 10716 genes, 0.2%	1
biological_process	DNA recombination	6 out of 1851 genes, 0.3%	38 out of 10716 genes, 0.4%	1
biological_process	protein phosphorylation	5 out of 1851 genes, 0.3%	32 out of 10716 genes, 0.3%	1
biological_process	cell surface receptor signaling pathway	9 out of 1851 genes, 0.5%	57 out of 10716 genes, 0.5%	1
biological_process	response to hormone stimulus	67 out of 1851 genes, 3.6%	405 out of 10716 genes, 3.8%	1
biological_process	vitamin metabolic process	8 out of 1851 genes, 0.4%	51 out of 10716 genes, 0.5%	1
biological_process	glutamine family amino acid metabolic process	8 out of 1851 genes, 0.4%	51 out of 10716 genes, 0.5%	1
biological_process	organic acid transport	7 out of 1851 genes, 0.4%	45 out of 10716 genes, 0.4%	1
biological_process	carboxylic acid transport	7 out of 1851 genes, 0.4%	45 out of 10716 genes, 0.4%	1
biological_process	cellular process involved in reproduction	7 out of 1851 genes, 0.4%	45 out of 10716 genes, 0.4%	1
biological_process	regulation of nucleoside metabolic process	4 out of 1851 genes, 0.2%	26 out of 10716 genes, 0.2%	1
biological_process	regulation of nucleotide catabolic process	4 out of 1851 genes, 0.2%	26 out of 10716 genes, 0.2%	1
biological_process	regulation of cellular catabolic process	4 out of 1851 genes, 0.2%	26 out of 10716 genes, 0.2%	1
biological_process	regulation of purine nucleotide catabolic process	4 out of 1851 genes, 0.2%	26 out of 10716 genes, 0.2%	1
biological_process	regulation of GTP catabolic process	4 out of 1851 genes, 0.2%	26 out of 10716 genes, 0.2%	1
biological_process	regulation of purine nucleotide metabolic process	4 out of 1851 genes, 0.2%	26 out of 10716 genes, 0.2%	1
biological_process	shoot system development	12 out of 1851 genes, 0.6%	76 out of 10716 genes, 0.7%	1
biological_process	ubiquitin-dependent protein catabolic process	2 out of 1851 genes, 0.1%	13 out of 10716 genes, 0.1%	1
biological_process	root epidermal cell differentiation	2 out of 1851 genes, 0.1%	13 out of 10716 genes, 0.1%	1
biological_process	multicellular organism reproduction	2 out of 1851 genes, 0.1%	13 out of 10716 genes, 0.1%	1
biological_process	regulation of cellular component size	2 out of 1851 genes, 0.1%	13 out of 10716 genes, 0.1%	1
biological_process	multicellular organismal reproductive process	2 out of 1851 genes, 0.1%	13 out of 10716 genes, 0.1%	1
biological_process	regulation of anatomical structure size	2 out of 1851 genes, 0.1%	13 out of 10716 genes, 0.1%	1
biological_process	response to endogenous stimulus	71 out of 1851 genes, 3.8%	430 out of 10716 genes, 4.0%	1
biological_process	signaling	96 out of 1851 genes, 5.2%	579 out of 10716 genes, 5.4%	1
biological_process	carbohydrate derivative metabolic process	24 out of 1851 genes, 1.3%	150 out of 10716 genes, 1.4%	1
biological_process	lipid transport	3 out of 1851 genes, 0.2%	20 out of 10716 genes, 0.2%	1
biological_process	cellular amide metabolic process	3 out of 1851 genes, 0.2%	20 out of 10716 genes, 0.2%	1
biological_process	cell wall biogenesis	5 out of 1851 genes, 0.3%	33 out of 10716 genes, 0.3%	1
biological_process	meiotic cell cycle	5 out of 1851 genes, 0.3%	33 out of 10716 genes, 0.3%	1
biological_process	cell cycle	20 out of 1851 genes, 1.1%	126 out of 10716 genes, 1.2%	1
biological_process	M phase	7 out of 1851 genes, 0.4%	46 out of 10716 genes, 0.4%	1
biological_process	pigment metabolic process	10 out of 1851 genes, 0.5%	65 out of 10716 genes, 0.6%	1
biological_process	actin filament-based process	4 out of 1851 genes, 0.2%	27 out of 10716 genes, 0.3%	1
biological_process	multi-organism process	36 out of 1851 genes, 1.9%	224 out of 10716 genes, 2.1%	1
biological_process	tissue development	20 out of 1851 genes, 1.1%	127 out of 10716 genes, 1.2%	1
biological_process	glycerophospholipid metabolic process	6 out of 1851 genes, 0.3%	40 out of 10716 genes, 0.4%	1
biological_process	immune system process	8 out of 1851 genes, 0.4%	53 out of 10716 genes, 0.5%	1
biological_process	meristem development	8 out of 1851 genes, 0.4%	53 out of 10716 genes, 0.5%	1
biological_process	root system development	11 out of 1851 genes, 0.6%	72 out of 10716 genes, 0.7%	1
biological_process	root development	11 out of 1851 genes, 0.6%	72 out of 10716 genes, 0.7%	1
biological_process	sphingolipid metabolic process	2 out of 1851 genes, 0.1%	14 out of 10716 genes, 0.1%	1
biological_process	calcium ion transport	2 out of 1851 genes, 0.1%	14 out of 10716 genes, 0.1%	1
biological_process	nucleus organization	2 out of 1851 genes, 0.1%	14 out of 10716 genes, 0.1%	1
biological_process	peroxisome organization	2 out of 1851 genes, 0.1%	14 out of 10716 genes, 0.1%	1
biological_process	response to water stimulus	2 out of 1851 genes, 0.1%	14 out of 10716 genes, 0.1%	1
biological_process	M phase of mitotic cell cycle	3 out of 1851 genes, 0.2%	21 out of 10716 genes, 0.2%	1
biological_process	recombinational repair	3 out of 1851 genes, 0.2%	21 out of 10716 genes, 0.2%	1
biological_process	cellular response to chemical stimulus	31 out of 1851 genes, 1.7%	196 out of 10716 genes, 1.8%	1
biological_process	flavone metabolic process	4 out of 1851 genes, 0.2%	28 out of 10716 genes, 0.3%	1
biological_process	flavone biosynthetic process	4 out of 1851 genes, 0.2%	28 out of 10716 genes, 0.3%	1
biological_process	hexose metabolic process	20 out of 1851 genes, 1.1%	129 out of 10716 genes, 1.2%	1
biological_process	ion transmembrane transport	13 out of 1851 genes, 0.7%	86 out of 10716 genes, 0.8%	1
biological_process	regulation of biological quality	47 out of 1851 genes, 2.5%	295 out of 10716 genes, 2.8%	1
biological_process	response to temperature stimulus	6 out of 1851 genes, 0.3%	42 out of 10716 genes, 0.4%	1
biological_process	developmental growth	6 out of 1851 genes, 0.3%	42 out of 10716 genes, 0.4%	1
biological_process	flavonoid biosynthetic process	8 out of 1851 genes, 0.4%	55 out of 10716 genes, 0.5%	1
biological_process	polyamine biosynthetic process	2 out of 1851 genes, 0.1%	15 out of 10716 genes, 0.1%	1
biological_process	meristem structural organization	2 out of 1851 genes, 0.1%	15 out of 10716 genes, 0.1%	1
biological_process	organophosphate ester transport	2 out of 1851 genes, 0.1%	15 out of 10716 genes, 0.1%	1
biological_process	production of siRNA involved in RNA interference	2 out of 1851 genes, 0.1%	15 out of 10716 genes, 0.1%	1
biological_process	anatomical structure arrangement	2 out of 1851 genes, 0.1%	15 out of 10716 genes, 0.1%	1
biological_process	DNA alkylation	4 out of 1851 genes, 0.2%	29 out of 10716 genes, 0.3%	1
biological_process	meiosis	4 out of 1851 genes, 0.2%	29 out of 10716 genes, 0.3%	1
biological_process	nuclear transport	4 out of 1851 genes, 0.2%	29 out of 10716 genes, 0.3%	1
biological_process	M phase of meiotic cell cycle	4 out of 1851 genes, 0.2%	29 out of 10716 genes, 0.3%	1
biological_process	cellular homeostasis	23 out of 1851 genes, 1.2%	150 out of 10716 genes, 1.4%	1
biological_process	tropism	5 out of 1851 genes, 0.3%	36 out of 10716 genes, 0.3%	1
biological_process	glycerolipid metabolic process	6 out of 1851 genes, 0.3%	43 out of 10716 genes, 0.4%	1
biological_process	organonitrogen compound biosynthetic process	43 out of 1851 genes, 2.3%	274 out of 10716 genes, 2.6%	1
biological_process	membrane lipid metabolic process	3 out of 1851 genes, 0.2%	23 out of 10716 genes, 0.2%	1
biological_process	response to gravity	3 out of 1851 genes, 0.2%	23 out of 10716 genes, 0.2%	1
biological_process	nucleobase-containing compound transport	4 out of 1851 genes, 0.2%	30 out of 10716 genes, 0.3%	1
biological_process	single organism reproductive process	4 out of 1851 genes, 0.2%	30 out of 10716 genes, 0.3%	1
biological_process	single-organism carbohydrate metabolic process	45 out of 1851 genes, 2.4%	287 out of 10716 genes, 2.7%	1
biological_process	regulation of hydrolase activity	5 out of 1851 genes, 0.3%	37 out of 10716 genes, 0.3%	1
biological_process	fat-soluble vitamin metabolic process	2 out of 1851 genes, 0.1%	16 out of 10716 genes, 0.1%	1
biological_process	response to heat	2 out of 1851 genes, 0.1%	16 out of 10716 genes, 0.1%	1
biological_process	cellular biogenic amine biosynthetic process	2 out of 1851 genes, 0.1%	16 out of 10716 genes, 0.1%	1
biological_process	phosphatidylinositol metabolic process	2 out of 1851 genes, 0.1%	16 out of 10716 genes, 0.1%	1
biological_process	cytoskeleton organization	7 out of 1851 genes, 0.4%	51 out of 10716 genes, 0.5%	1
biological_process	proton transport	7 out of 1851 genes, 0.4%	51 out of 10716 genes, 0.5%	1
biological_process	flavonoid metabolic process	8 out of 1851 genes, 0.4%	58 out of 10716 genes, 0.5%	1
biological_process	cell cycle phase	8 out of 1851 genes, 0.4%	58 out of 10716 genes, 0.5%	1
biological_process	DNA modification	4 out of 1851 genes, 0.2%	31 out of 10716 genes, 0.3%	1
biological_process	glucose metabolic process	14 out of 1851 genes, 0.8%	97 out of 10716 genes, 0.9%	1
biological_process	anatomical structure formation involved in morphogenesis	5 out of 1851 genes, 0.3%	38 out of 10716 genes, 0.4%	1
biological_process	cellular lipid metabolic process	59 out of 1851 genes, 3.2%	376 out of 10716 genes, 3.5%	1
biological_process	anatomical structure morphogenesis	48 out of 1851 genes, 2.6%	309 out of 10716 genes, 2.9%	1
biological_process	cellular amino acid metabolic process	65 out of 1851 genes, 3.5%	413 out of 10716 genes, 3.9%	1
biological_process	phosphorelay signal transduction system	2 out of 1851 genes, 0.1%	17 out of 10716 genes, 0.2%	1
biological_process	arginine metabolic process	2 out of 1851 genes, 0.1%	17 out of 10716 genes, 0.2%	1
biological_process	hyperosmotic response	2 out of 1851 genes, 0.1%	17 out of 10716 genes, 0.2%	1
biological_process	fertilization	2 out of 1851 genes, 0.1%	17 out of 10716 genes, 0.2%	1
biological_process	peptidyl-amino acid modification	2 out of 1851 genes, 0.1%	17 out of 10716 genes, 0.2%	1
biological_process	production of small RNA involved in gene silencing by RNA	2 out of 1851 genes, 0.1%	17 out of 10716 genes, 0.2%	1
biological_process	nucleoside triphosphate catabolic process	31 out of 1851 genes, 1.7%	205 out of 10716 genes, 1.9%	1
biological_process	purine nucleoside triphosphate catabolic process	31 out of 1851 genes, 1.7%	205 out of 10716 genes, 1.9%	1
biological_process	ribonucleoside triphosphate catabolic process	31 out of 1851 genes, 1.7%	205 out of 10716 genes, 1.9%	1
biological_process	purine ribonucleoside triphosphate catabolic process	31 out of 1851 genes, 1.7%	205 out of 10716 genes, 1.9%	1
biological_process	macromolecule catabolic process	36 out of 1851 genes, 1.9%	236 out of 10716 genes, 2.2%	1
biological_process	monosaccharide metabolic process	22 out of 1851 genes, 1.2%	149 out of 10716 genes, 1.4%	1
biological_process	organophosphate catabolic process	31 out of 1851 genes, 1.7%	206 out of 10716 genes, 1.9%	1
biological_process	nucleoside phosphate catabolic process	31 out of 1851 genes, 1.7%	206 out of 10716 genes, 1.9%	1
biological_process	cell growth	9 out of 1851 genes, 0.5%	66 out of 10716 genes, 0.6%	1
biological_process	phosphorylation	5 out of 1851 genes, 0.3%	39 out of 10716 genes, 0.4%	1
biological_process	pyrimidine-containing compound metabolic process	4 out of 1851 genes, 0.2%	32 out of 10716 genes, 0.3%	1
biological_process	mitotic cell cycle	3 out of 1851 genes, 0.2%	25 out of 10716 genes, 0.2%	1
biological_process	response to cold	3 out of 1851 genes, 0.2%	25 out of 10716 genes, 0.2%	1
biological_process	meristem maintenance	3 out of 1851 genes, 0.2%	25 out of 10716 genes, 0.2%	1
biological_process	protein modification by small protein conjugation or removal	20 out of 1851 genes, 1.1%	138 out of 10716 genes, 1.3%	1
biological_process	chromatin organization	17 out of 1851 genes, 0.9%	119 out of 10716 genes, 1.1%	1
biological_process	alpha-amino acid metabolic process	25 out of 1851 genes, 1.4%	170 out of 10716 genes, 1.6%	1
biological_process	chromosome organization	19 out of 1851 genes, 1.0%	132 out of 10716 genes, 1.2%	1
biological_process	polyamine metabolic process	2 out of 1851 genes, 0.1%	18 out of 10716 genes, 0.2%	1
biological_process	ethylene metabolic process	2 out of 1851 genes, 0.1%	18 out of 10716 genes, 0.2%	1
biological_process	axis specification	2 out of 1851 genes, 0.1%	18 out of 10716 genes, 0.2%	1
biological_process	dsRNA fragmentation	2 out of 1851 genes, 0.1%	18 out of 10716 genes, 0.2%	1
biological_process	response to dsRNA	2 out of 1851 genes, 0.1%	18 out of 10716 genes, 0.2%	1
biological_process	cellular alkene metabolic process	2 out of 1851 genes, 0.1%	18 out of 10716 genes, 0.2%	1
biological_process	lateral root development	2 out of 1851 genes, 0.1%	18 out of 10716 genes, 0.2%	1
biological_process	organelle localization	2 out of 1851 genes, 0.1%	18 out of 10716 genes, 0.2%	1
biological_process	cellular response to dsRNA	2 out of 1851 genes, 0.1%	18 out of 10716 genes, 0.2%	1
biological_process	olefin metabolic process	2 out of 1851 genes, 0.1%	18 out of 10716 genes, 0.2%	1
biological_process	cellular response to nitrogen compound	2 out of 1851 genes, 0.1%	18 out of 10716 genes, 0.2%	1
biological_process	DNA replication	5 out of 1851 genes, 0.3%	40 out of 10716 genes, 0.4%	1
biological_process	porphyrin-containing compound biosynthetic process	6 out of 1851 genes, 0.3%	47 out of 10716 genes, 0.4%	1
biological_process	macromolecular complex subunit organization	19 out of 1851 genes, 1.0%	133 out of 10716 genes, 1.2%	1
biological_process	carboxylic acid metabolic process	114 out of 1851 genes, 6.2%	716 out of 10716 genes, 6.7%	1
biological_process	response to osmotic stress	30 out of 1851 genes, 1.6%	203 out of 10716 genes, 1.9%	1
biological_process	DNA metabolic process	54 out of 1851 genes, 2.9%	353 out of 10716 genes, 3.3%	1
biological_process	cellular component morphogenesis	24 out of 1851 genes, 1.3%	166 out of 10716 genes, 1.5%	1
biological_process	organonitrogen compound metabolic process	112 out of 1851 genes, 6.1%	706 out of 10716 genes, 6.6%	1
biological_process	isoprenoid biosynthetic process	4 out of 1851 genes, 0.2%	34 out of 10716 genes, 0.3%	1
biological_process	cellular metabolic compound salvage	4 out of 1851 genes, 0.2%	34 out of 10716 genes, 0.3%	1
biological_process	monovalent inorganic cation transport	9 out of 1851 genes, 0.5%	69 out of 10716 genes, 0.6%	1
biological_process	amine biosynthetic process	2 out of 1851 genes, 0.1%	19 out of 10716 genes, 0.2%	1
biological_process	seed germination	2 out of 1851 genes, 0.1%	19 out of 10716 genes, 0.2%	1
biological_process	pentose metabolic process	2 out of 1851 genes, 0.1%	19 out of 10716 genes, 0.2%	1
biological_process	seedling development	2 out of 1851 genes, 0.1%	19 out of 10716 genes, 0.2%	1
biological_process	carbohydrate catabolic process	15 out of 1851 genes, 0.8%	109 out of 10716 genes, 1.0%	1
biological_process	transmembrane transport	13 out of 1851 genes, 0.7%	96 out of 10716 genes, 0.9%	1
biological_process	developmental cell growth	3 out of 1851 genes, 0.2%	27 out of 10716 genes, 0.3%	1
biological_process	post-embryonic organ development	7 out of 1851 genes, 0.4%	56 out of 10716 genes, 0.5%	1
biological_process	isoprenoid metabolic process	12 out of 1851 genes, 0.6%	90 out of 10716 genes, 0.8%	1
biological_process	oxoacid metabolic process	114 out of 1851 genes, 6.2%	722 out of 10716 genes, 6.7%	1
biological_process	nucleobase-containing compound catabolic process	32 out of 1851 genes, 1.7%	219 out of 10716 genes, 2.0%	1
biological_process	ether metabolic process	4 out of 1851 genes, 0.2%	35 out of 10716 genes, 0.3%	1
biological_process	divalent metal ion transport	4 out of 1851 genes, 0.2%	35 out of 10716 genes, 0.3%	1
biological_process	divalent inorganic cation transport	4 out of 1851 genes, 0.2%	35 out of 10716 genes, 0.3%	1
biological_process	organic acid metabolic process	114 out of 1851 genes, 6.2%	723 out of 10716 genes, 6.7%	1
biological_process	nucleocytoplasmic transport	2 out of 1851 genes, 0.1%	20 out of 10716 genes, 0.2%	1
biological_process	energy coupled proton transport, down electrochemical gradient	2 out of 1851 genes, 0.1%	20 out of 10716 genes, 0.2%	1
biological_process	ATP synthesis coupled proton transport	2 out of 1851 genes, 0.1%	20 out of 10716 genes, 0.2%	1
biological_process	regulation of Ras GTPase activity	2 out of 1851 genes, 0.1%	20 out of 10716 genes, 0.2%	1
biological_process	tetrapyrrole biosynthetic process	6 out of 1851 genes, 0.3%	50 out of 10716 genes, 0.5%	1
biological_process	energy coupled proton transmembrane transport, against electrochemical gradient	4 out of 1851 genes, 0.2%	36 out of 10716 genes, 0.3%	1
biological_process	ketone biosynthetic process	8 out of 1851 genes, 0.4%	65 out of 10716 genes, 0.6%	1
biological_process	metabolic process	1308 out of 1851 genes, 70.7%	7698 out of 10716 genes, 71.8%	1
biological_process	regulation of GTPase activity	2 out of 1851 genes, 0.1%	21 out of 10716 genes, 0.2%	1
biological_process	cell morphogenesis	21 out of 1851 genes, 1.1%	153 out of 10716 genes, 1.4%	1
biological_process	pollen development	4 out of 1851 genes, 0.2%	37 out of 10716 genes, 0.3%	1
biological_process	terpenoid metabolic process	8 out of 1851 genes, 0.4%	66 out of 10716 genes, 0.6%	1
biological_process	aromatic compound catabolic process	33 out of 1851 genes, 1.8%	231 out of 10716 genes, 2.2%	1
biological_process	regulation of catalytic activity	5 out of 1851 genes, 0.3%	45 out of 10716 genes, 0.4%	1
biological_process	DNA-dependent DNA replication	2 out of 1851 genes, 0.1%	22 out of 10716 genes, 0.2%	1
biological_process	mRNA processing	2 out of 1851 genes, 0.1%	22 out of 10716 genes, 0.2%	1
biological_process	gravitropism	2 out of 1851 genes, 0.1%	22 out of 10716 genes, 0.2%	1
biological_process	cytoplasmic transport	2 out of 1851 genes, 0.1%	22 out of 10716 genes, 0.2%	1
biological_process	cellular nitrogen compound catabolic process	33 out of 1851 genes, 1.8%	234 out of 10716 genes, 2.2%	1
biological_process	heterocycle catabolic process	33 out of 1851 genes, 1.8%	234 out of 10716 genes, 2.2%	1
biological_process	terpenoid biosynthetic process	3 out of 1851 genes, 0.2%	31 out of 10716 genes, 0.3%	1
biological_process	multi-organism cellular process	3 out of 1851 genes, 0.2%	31 out of 10716 genes, 0.3%	1
biological_process	mRNA metabolic process	4 out of 1851 genes, 0.2%	39 out of 10716 genes, 0.4%	1
biological_process	organic cyclic compound catabolic process	33 out of 1851 genes, 1.8%	235 out of 10716 genes, 2.2%	1
biological_process	cellular component organization	118 out of 1851 genes, 6.4%	764 out of 10716 genes, 7.1%	1
biological_process	protein glycosylation	2 out of 1851 genes, 0.1%	23 out of 10716 genes, 0.2%	1
biological_process	glycoprotein metabolic process	2 out of 1851 genes, 0.1%	23 out of 10716 genes, 0.2%	1
biological_process	glycoprotein biosynthetic process	2 out of 1851 genes, 0.1%	23 out of 10716 genes, 0.2%	1
biological_process	macromolecule glycosylation	2 out of 1851 genes, 0.1%	23 out of 10716 genes, 0.2%	1
biological_process	glycosylation	2 out of 1851 genes, 0.1%	23 out of 10716 genes, 0.2%	1
biological_process	response to nitrogen compound	2 out of 1851 genes, 0.1%	23 out of 10716 genes, 0.2%	1
biological_process	cell cycle process	12 out of 1851 genes, 0.6%	97 out of 10716 genes, 0.9%	1
biological_process	intracellular signal transduction	13 out of 1851 genes, 0.7%	104 out of 10716 genes, 1.0%	1
biological_process	cellular protein modification process	166 out of 1851 genes, 9.0%	1057 out of 10716 genes, 9.9%	1
biological_process	protein modification process	166 out of 1851 genes, 9.0%	1057 out of 10716 genes, 9.9%	1
biological_process	regulation of catabolic process	4 out of 1851 genes, 0.2%	40 out of 10716 genes, 0.4%	1
biological_process	starch metabolic process	2 out of 1851 genes, 0.1%	24 out of 10716 genes, 0.2%	1
biological_process	genetic transfer	2 out of 1851 genes, 0.1%	24 out of 10716 genes, 0.2%	1
biological_process	nucleoside triphosphate biosynthetic process	11 out of 1851 genes, 0.6%	92 out of 10716 genes, 0.9%	1
biological_process	auxin transport	3 out of 1851 genes, 0.2%	33 out of 10716 genes, 0.3%	1
biological_process	regionalization	7 out of 1851 genes, 0.4%	64 out of 10716 genes, 0.6%	1
biological_process	regulation of gene expression, epigenetic	7 out of 1851 genes, 0.4%	64 out of 10716 genes, 0.6%	1
biological_process	cellular membrane organization	5 out of 1851 genes, 0.3%	49 out of 10716 genes, 0.5%	1
biological_process	membrane organization	5 out of 1851 genes, 0.3%	49 out of 10716 genes, 0.5%	1
biological_process	pattern specification process	8 out of 1851 genes, 0.4%	72 out of 10716 genes, 0.7%	1
biological_process	immune response	2 out of 1851 genes, 0.1%	25 out of 10716 genes, 0.2%	1
biological_process	innate immune response	2 out of 1851 genes, 0.1%	25 out of 10716 genes, 0.2%	1
biological_process	cellular response to oxygen-containing compound	4 out of 1851 genes, 0.2%	42 out of 10716 genes, 0.4%	1
biological_process	porphyrin-containing compound metabolic process	7 out of 1851 genes, 0.4%	65 out of 10716 genes, 0.6%	1
biological_process	aging	3 out of 1851 genes, 0.2%	34 out of 10716 genes, 0.3%	1
biological_process	hormone transport	3 out of 1851 genes, 0.2%	34 out of 10716 genes, 0.3%	1
biological_process	nucleoside triphosphate metabolic process	39 out of 1851 genes, 2.1%	281 out of 10716 genes, 2.6%	1
biological_process	single-organism metabolic process	302 out of 1851 genes, 16.3%	1888 out of 10716 genes, 17.6%	1
biological_process	organ development	42 out of 1851 genes, 2.3%	302 out of 10716 genes, 2.8%	1
biological_process	nucleoside biosynthetic process	4 out of 1851 genes, 0.2%	43 out of 10716 genes, 0.4%	1
biological_process	ribonucleoside biosynthetic process	4 out of 1851 genes, 0.2%	43 out of 10716 genes, 0.4%	1
biological_process	hydrogen transport	9 out of 1851 genes, 0.5%	81 out of 10716 genes, 0.8%	1
biological_process	purine nucleoside triphosphate metabolic process	38 out of 1851 genes, 2.1%	278 out of 10716 genes, 2.6%	1
biological_process	ribonucleoside triphosphate metabolic process	38 out of 1851 genes, 2.1%	278 out of 10716 genes, 2.6%	1
biological_process	purine ribonucleoside triphosphate metabolic process	38 out of 1851 genes, 2.1%	278 out of 10716 genes, 2.6%	1
biological_process	small molecule metabolic process	235 out of 1851 genes, 12.7%	1493 out of 10716 genes, 13.9%	1
biological_process	RNA interference	2 out of 1851 genes, 0.1%	27 out of 10716 genes, 0.3%	1
biological_process	glucose catabolic process	10 out of 1851 genes, 0.5%	90 out of 10716 genes, 0.8%	1
biological_process	hexose catabolic process	10 out of 1851 genes, 0.5%	90 out of 10716 genes, 0.8%	1
biological_process	monosaccharide catabolic process	10 out of 1851 genes, 0.5%	90 out of 10716 genes, 0.8%	1
biological_process	tetrapyrrole metabolic process	7 out of 1851 genes, 0.4%	68 out of 10716 genes, 0.6%	1
biological_process	tRNA aminoacylation for protein translation	9 out of 1851 genes, 0.5%	83 out of 10716 genes, 0.8%	1
biological_process	growth	14 out of 1851 genes, 0.8%	119 out of 10716 genes, 1.1%	1
biological_process	cellular ketone metabolic process	8 out of 1851 genes, 0.4%	76 out of 10716 genes, 0.7%	1
biological_process	coenzyme biosynthetic process	5 out of 1851 genes, 0.3%	53 out of 10716 genes, 0.5%	1
biological_process	purine nucleoside triphosphate biosynthetic process	10 out of 1851 genes, 0.5%	91 out of 10716 genes, 0.8%	1
biological_process	ribonucleoside triphosphate biosynthetic process	10 out of 1851 genes, 0.5%	91 out of 10716 genes, 0.8%	1
biological_process	purine ribonucleoside triphosphate biosynthetic process	10 out of 1851 genes, 0.5%	91 out of 10716 genes, 0.8%	1
biological_process	amino acid activation	9 out of 1851 genes, 0.5%	84 out of 10716 genes, 0.8%	1
biological_process	tRNA aminoacylation	9 out of 1851 genes, 0.5%	84 out of 10716 genes, 0.8%	1
biological_process	RNA splicing	2 out of 1851 genes, 0.1%	28 out of 10716 genes, 0.3%	1
biological_process	respiratory electron transport chain	2 out of 1851 genes, 0.1%	28 out of 10716 genes, 0.3%	1
biological_process	glycosyl compound biosynthetic process	4 out of 1851 genes, 0.2%	46 out of 10716 genes, 0.4%	1
biological_process	cofactor biosynthetic process	11 out of 1851 genes, 0.6%	100 out of 10716 genes, 0.9%	1
biological_process	cellular protein complex assembly	6 out of 1851 genes, 0.3%	63 out of 10716 genes, 0.6%	1
biological_process	organic cyclic compound biosynthetic process	133 out of 1851 genes, 7.2%	887 out of 10716 genes, 8.3%	1
biological_process	purine-containing compound biosynthetic process	6 out of 1851 genes, 0.3%	64 out of 10716 genes, 0.6%	1
biological_process	organ senescence	2 out of 1851 genes, 0.1%	30 out of 10716 genes, 0.3%	1
biological_process	regulation of Ras protein signal transduction	2 out of 1851 genes, 0.1%	30 out of 10716 genes, 0.3%	1
biological_process	regulation of small GTPase mediated signal transduction	2 out of 1851 genes, 0.1%	30 out of 10716 genes, 0.3%	1
biological_process	single-organism carbohydrate catabolic process	10 out of 1851 genes, 0.5%	95 out of 10716 genes, 0.9%	1
biological_process	single-organism process	479 out of 1851 genes, 25.9%	2972 out of 10716 genes, 27.7%	1
biological_process	aromatic compound biosynthetic process	129 out of 1851 genes, 7.0%	867 out of 10716 genes, 8.1%	1
biological_process	histone modification	4 out of 1851 genes, 0.2%	49 out of 10716 genes, 0.5%	1
biological_process	organophosphate metabolic process	66 out of 1851 genes, 3.6%	472 out of 10716 genes, 4.4%	1
biological_process	regulation of signal transduction	2 out of 1851 genes, 0.1%	31 out of 10716 genes, 0.3%	1
biological_process	regulation of signaling	2 out of 1851 genes, 0.1%	31 out of 10716 genes, 0.3%	1
biological_process	gene silencing by RNA	2 out of 1851 genes, 0.1%	31 out of 10716 genes, 0.3%	1
biological_process	posttranscriptional gene silencing by RNA	2 out of 1851 genes, 0.1%	31 out of 10716 genes, 0.3%	1
biological_process	regulation of cellular component organization	2 out of 1851 genes, 0.1%	31 out of 10716 genes, 0.3%	1
biological_process	regulation of response to stimulus	5 out of 1851 genes, 0.3%	58 out of 10716 genes, 0.5%	1
biological_process	ATP biosynthetic process	3 out of 1851 genes, 0.2%	41 out of 10716 genes, 0.4%	1
biological_process	purine nucleoside biosynthetic process	3 out of 1851 genes, 0.2%	41 out of 10716 genes, 0.4%	1
biological_process	purine ribonucleoside biosynthetic process	3 out of 1851 genes, 0.2%	41 out of 10716 genes, 0.4%	1
biological_process	cellular developmental process	30 out of 1851 genes, 1.6%	238 out of 10716 genes, 2.2%	1
biological_process	nucleoside metabolic process	4 out of 1851 genes, 0.2%	50 out of 10716 genes, 0.5%	1
biological_process	ribonucleoside metabolic process	4 out of 1851 genes, 0.2%	50 out of 10716 genes, 0.5%	1
biological_process	photosynthesis	4 out of 1851 genes, 0.2%	50 out of 10716 genes, 0.5%	1
biological_process	covalent chromatin modification	4 out of 1851 genes, 0.2%	50 out of 10716 genes, 0.5%	1
biological_process	cellular macromolecular complex assembly	6 out of 1851 genes, 0.3%	67 out of 10716 genes, 0.6%	1
biological_process	purine-containing compound metabolic process	8 out of 1851 genes, 0.4%	83 out of 10716 genes, 0.8%	1
biological_process	chromatin modification	5 out of 1851 genes, 0.3%	59 out of 10716 genes, 0.6%	1
biological_process	single-organism developmental process	59 out of 1851 genes, 3.2%	431 out of 10716 genes, 4.0%	1
biological_process	ribonucleotide biosynthetic process	4 out of 1851 genes, 0.2%	51 out of 10716 genes, 0.5%	1
biological_process	ribose phosphate biosynthetic process	4 out of 1851 genes, 0.2%	51 out of 10716 genes, 0.5%	1
biological_process	cell division	2 out of 1851 genes, 0.1%	33 out of 10716 genes, 0.3%	1
biological_process	ATP metabolic process	3 out of 1851 genes, 0.2%	43 out of 10716 genes, 0.4%	1
biological_process	protein complex assembly	6 out of 1851 genes, 0.3%	69 out of 10716 genes, 0.6%	1
biological_process	plastid organization	9 out of 1851 genes, 0.5%	93 out of 10716 genes, 0.9%	1
biological_process	glycosyl compound metabolic process	5 out of 1851 genes, 0.3%	61 out of 10716 genes, 0.6%	1
biological_process	regulation of cell communication	2 out of 1851 genes, 0.1%	34 out of 10716 genes, 0.3%	1
biological_process	posttranscriptional gene silencing	2 out of 1851 genes, 0.1%	34 out of 10716 genes, 0.3%	1
biological_process	organophosphate biosynthetic process	17 out of 1851 genes, 0.9%	153 out of 10716 genes, 1.4%	1
biological_process	ribonucleotide metabolic process	4 out of 1851 genes, 0.2%	53 out of 10716 genes, 0.5%	1
biological_process	ribose phosphate metabolic process	4 out of 1851 genes, 0.2%	53 out of 10716 genes, 0.5%	1
biological_process	protein complex biogenesis	6 out of 1851 genes, 0.3%	70 out of 10716 genes, 0.7%	1
biological_process	tRNA metabolic process	15 out of 1851 genes, 0.8%	139 out of 10716 genes, 1.3%	1
biological_process	gametophyte development	15 out of 1851 genes, 0.8%	140 out of 10716 genes, 1.3%	1
biological_process	photosynthesis, light reaction	3 out of 1851 genes, 0.2%	45 out of 10716 genes, 0.4%	1
biological_process	purine ribonucleoside metabolic process	3 out of 1851 genes, 0.2%	45 out of 10716 genes, 0.4%	1
biological_process	regulation of nucleobase-containing compound metabolic process	15 out of 1851 genes, 0.8%	141 out of 10716 genes, 1.3%	1
biological_process	macromolecule methylation	4 out of 1851 genes, 0.2%	55 out of 10716 genes, 0.5%	1
biological_process	response to metal ion	31 out of 1851 genes, 1.7%	255 out of 10716 genes, 2.4%	1
biological_process	regulation of nitrogen compound metabolic process	15 out of 1851 genes, 0.8%	142 out of 10716 genes, 1.3%	1
biological_process	purine nucleoside metabolic process	3 out of 1851 genes, 0.2%	46 out of 10716 genes, 0.4%	1
biological_process	protein complex subunit organization	7 out of 1851 genes, 0.4%	81 out of 10716 genes, 0.8%	1
biological_process	electron transport chain	5 out of 1851 genes, 0.3%	65 out of 10716 genes, 0.6%	1
biological_process	cellular modified amino acid metabolic process	2 out of 1851 genes, 0.1%	37 out of 10716 genes, 0.3%	1
biological_process	positive regulation of biological process	2 out of 1851 genes, 0.1%	37 out of 10716 genes, 0.3%	1
biological_process	multi-organism reproductive process	3 out of 1851 genes, 0.2%	47 out of 10716 genes, 0.4%	1
biological_process	response to inorganic substance	37 out of 1851 genes, 2.0%	299 out of 10716 genes, 2.8%	1
biological_process	nucleobase-containing small molecule metabolic process	53 out of 1851 genes, 2.9%	407 out of 10716 genes, 3.8%	1
biological_process	gene silencing	4 out of 1851 genes, 0.2%	57 out of 10716 genes, 0.5%	1
biological_process	regulation of transcription, DNA-dependent	10 out of 1851 genes, 0.5%	107 out of 10716 genes, 1.0%	1
biological_process	regulation of RNA metabolic process	10 out of 1851 genes, 0.5%	107 out of 10716 genes, 1.0%	1
biological_process	regulation of RNA biosynthetic process	10 out of 1851 genes, 0.5%	107 out of 10716 genes, 1.0%	1
biological_process	modification-dependent protein catabolic process	17 out of 1851 genes, 0.9%	160 out of 10716 genes, 1.5%	1
biological_process	modification-dependent macromolecule catabolic process	17 out of 1851 genes, 0.9%	160 out of 10716 genes, 1.5%	1
biological_process	regulation of primary metabolic process	17 out of 1851 genes, 0.9%	160 out of 10716 genes, 1.5%	1
biological_process	single-organism cellular process	322 out of 1851 genes, 17.4%	2082 out of 10716 genes, 19.4%	1
biological_process	protein catabolic process	18 out of 1851 genes, 1.0%	168 out of 10716 genes, 1.6%	1
biological_process	cellular protein catabolic process	18 out of 1851 genes, 1.0%	168 out of 10716 genes, 1.6%	1
biological_process	phosphate-containing compound metabolic process	105 out of 1851 genes, 5.7%	747 out of 10716 genes, 7.0%	1
biological_process	macromolecule modification	172 out of 1851 genes, 9.3%	1168 out of 10716 genes, 10.9%	1
biological_process	transcription, DNA-dependent	80 out of 1851 genes, 4.3%	587 out of 10716 genes, 5.5%	1
biological_process	RNA biosynthetic process	80 out of 1851 genes, 4.3%	587 out of 10716 genes, 5.5%	1
biological_process	phosphorus metabolic process	108 out of 1851 genes, 5.8%	767 out of 10716 genes, 7.2%	1
biological_process	energy derivation by oxidation of organic compounds	6 out of 1851 genes, 0.3%	76 out of 10716 genes, 0.7%	1
biological_process	purine ribonucleotide biosynthetic process	3 out of 1851 genes, 0.2%	49 out of 10716 genes, 0.5%	1
biological_process	chromosome segregation	2 out of 1851 genes, 0.1%	39 out of 10716 genes, 0.4%	1
biological_process	negative regulation of gene expression	4 out of 1851 genes, 0.2%	59 out of 10716 genes, 0.6%	1
biological_process	methylation	4 out of 1851 genes, 0.2%	59 out of 10716 genes, 0.6%	1
biological_process	proteolysis involved in cellular protein catabolic process	17 out of 1851 genes, 0.9%	163 out of 10716 genes, 1.5%	1
biological_process	protein methylation	2 out of 1851 genes, 0.1%	40 out of 10716 genes, 0.4%	1
biological_process	pollination	2 out of 1851 genes, 0.1%	40 out of 10716 genes, 0.4%	1
biological_process	multi-multicellular organism process	2 out of 1851 genes, 0.1%	40 out of 10716 genes, 0.4%	1
biological_process	negative regulation of macromolecule metabolic process	4 out of 1851 genes, 0.2%	60 out of 10716 genes, 0.6%	1
biological_process	purine ribonucleotide metabolic process	3 out of 1851 genes, 0.2%	51 out of 10716 genes, 0.5%	1
biological_process	negative regulation of metabolic process	4 out of 1851 genes, 0.2%	61 out of 10716 genes, 0.6%	1
biological_process	macromolecular complex assembly	6 out of 1851 genes, 0.3%	79 out of 10716 genes, 0.7%	1
biological_process	cellular macromolecule catabolic process	19 out of 1851 genes, 1.0%	181 out of 10716 genes, 1.7%	1
biological_process	organic substance catabolic process	80 out of 1851 genes, 4.3%	596 out of 10716 genes, 5.6%	1
biological_process	organic substance biosynthetic process	225 out of 1851 genes, 12.2%	1509 out of 10716 genes, 14.1%	1
biological_process	purine nucleotide metabolic process	5 out of 1851 genes, 0.3%	71 out of 10716 genes, 0.7%	1
biological_process	coenzyme metabolic process	8 out of 1851 genes, 0.4%	97 out of 10716 genes, 0.9%	1
biological_process	negative regulation of cellular process	2 out of 1851 genes, 0.1%	42 out of 10716 genes, 0.4%	1
biological_process	nucleoside phosphate biosynthetic process	13 out of 1851 genes, 0.7%	137 out of 10716 genes, 1.3%	1
biological_process	nucleoside phosphate metabolic process	48 out of 1851 genes, 2.6%	386 out of 10716 genes, 3.6%	1
biological_process	proteolysis	17 out of 1851 genes, 0.9%	168 out of 10716 genes, 1.6%	1
biological_process	posttranscriptional regulation of gene expression	3 out of 1851 genes, 0.2%	53 out of 10716 genes, 0.5%	1
biological_process	nucleotide biosynthetic process	5 out of 1851 genes, 0.3%	72 out of 10716 genes, 0.7%	1
biological_process	post-embryonic development	32 out of 1851 genes, 1.7%	277 out of 10716 genes, 2.6%	1
biological_process	regulation of macromolecule biosynthetic process	10 out of 1851 genes, 0.5%	115 out of 10716 genes, 1.1%	1
biological_process	regulation of cellular macromolecule biosynthetic process	10 out of 1851 genes, 0.5%	115 out of 10716 genes, 1.1%	1
biological_process	cellular component organization or biogenesis	122 out of 1851 genes, 6.6%	874 out of 10716 genes, 8.2%	1
biological_process	protein alkylation	2 out of 1851 genes, 0.1%	44 out of 10716 genes, 0.4%	1
biological_process	organic substance transport	56 out of 1851 genes, 3.0%	445 out of 10716 genes, 4.2%	1
biological_process	regulation of cellular biosynthetic process	10 out of 1851 genes, 0.5%	117 out of 10716 genes, 1.1%	1
biological_process	carbohydrate derivative biosynthetic process	7 out of 1851 genes, 0.4%	92 out of 10716 genes, 0.9%	1
biological_process	regulation of cellular process	97 out of 1851 genes, 5.2%	717 out of 10716 genes, 6.7%	1
biological_process	regulation of biosynthetic process	10 out of 1851 genes, 0.5%	118 out of 10716 genes, 1.1%	1
biological_process	primary metabolic process	807 out of 1851 genes, 43.6%	4996 out of 10716 genes, 46.6%	1
biological_process	system development	53 out of 1851 genes, 2.9%	429 out of 10716 genes, 4.0%	1
biological_process	purine nucleotide biosynthetic process	3 out of 1851 genes, 0.2%	57 out of 10716 genes, 0.5%	1
biological_process	nucleotide metabolic process	11 out of 1851 genes, 0.6%	128 out of 10716 genes, 1.2%	1
biological_process	cell morphogenesis involved in differentiation	6 out of 1851 genes, 0.3%	86 out of 10716 genes, 0.8%	1
biological_process	catabolic process	82 out of 1851 genes, 4.4%	625 out of 10716 genes, 5.8%	1
biological_process	dicarboxylic acid metabolic process	2 out of 1851 genes, 0.1%	47 out of 10716 genes, 0.4%	1
biological_process	ncRNA metabolic process	15 out of 1851 genes, 0.8%	161 out of 10716 genes, 1.5%	1
biological_process	reproductive structure development	13 out of 1851 genes, 0.7%	147 out of 10716 genes, 1.4%	1
biological_process	reproductive system development	13 out of 1851 genes, 0.7%	147 out of 10716 genes, 1.4%	1
biological_process	regulation of cellular metabolic process	17 out of 1851 genes, 0.9%	179 out of 10716 genes, 1.7%	1
biological_process	generation of precursor metabolites and energy	20 out of 1851 genes, 1.1%	202 out of 10716 genes, 1.9%	1
biological_process	cofactor metabolic process	15 out of 1851 genes, 0.8%	164 out of 10716 genes, 1.5%	1
biological_process	biological regulation	169 out of 1851 genes, 9.1%	1192 out of 10716 genes, 11.1%	1
biological_process	cellular component assembly	7 out of 1851 genes, 0.4%	99 out of 10716 genes, 0.9%	1
biological_process	biosynthetic process	230 out of 1851 genes, 12.4%	1579 out of 10716 genes, 14.7%	1
biological_process	oxidation-reduction process	10 out of 1851 genes, 0.5%	127 out of 10716 genes, 1.2%	1
biological_process	macromolecule localization	33 out of 1851 genes, 1.8%	303 out of 10716 genes, 2.8%	1
biological_process	cellular respiration	3 out of 1851 genes, 0.2%	63 out of 10716 genes, 0.6%	1
biological_process	nucleobase-containing compound biosynthetic process	96 out of 1851 genes, 5.2%	732 out of 10716 genes, 6.8%	1
biological_process	cellular biosynthetic process	222 out of 1851 genes, 12.0%	1535 out of 10716 genes, 14.3%	1
biological_process	flower development	7 out of 1851 genes, 0.4%	102 out of 10716 genes, 1.0%	1
biological_process	protein targeting	4 out of 1851 genes, 0.2%	74 out of 10716 genes, 0.7%	1
biological_process	heterocycle biosynthetic process	111 out of 1851 genes, 6.0%	833 out of 10716 genes, 7.8%	1
biological_process	cellular nitrogen compound biosynthetic process	107 out of 1851 genes, 5.8%	808 out of 10716 genes, 7.5%	1
biological_process	organelle organization	43 out of 1851 genes, 2.3%	378 out of 10716 genes, 3.5%	1
biological_process	negative regulation of biological process	6 out of 1851 genes, 0.3%	97 out of 10716 genes, 0.9%	1
biological_process	cell differentiation	12 out of 1851 genes, 0.6%	152 out of 10716 genes, 1.4%	1
biological_process	regulation of gene expression	17 out of 1851 genes, 0.9%	194 out of 10716 genes, 1.8%	1
biological_process	intracellular protein transport	4 out of 1851 genes, 0.2%	82 out of 10716 genes, 0.8%	1
biological_process	anatomical structure development	77 out of 1851 genes, 4.2%	630 out of 10716 genes, 5.9%	1
biological_process	cellular catabolic process	53 out of 1851 genes, 2.9%	465 out of 10716 genes, 4.3%	1
biological_process	multicellular organismal process	107 out of 1851 genes, 5.8%	832 out of 10716 genes, 7.8%	1
biological_process	cell development	8 out of 1851 genes, 0.4%	123 out of 10716 genes, 1.1%	1
biological_process	protein metabolic process	285 out of 1851 genes, 15.4%	1967 out of 10716 genes, 18.4%	1
biological_process	regulation of biological process	116 out of 1851 genes, 6.3%	897 out of 10716 genes, 8.4%	1
biological_process	cellular aromatic compound metabolic process	285 out of 1851 genes, 15.4%	1974 out of 10716 genes, 18.4%	1
biological_process	organic cyclic compound metabolic process	292 out of 1851 genes, 15.8%	2019 out of 10716 genes, 18.8%	1
biological_process	single-multicellular organism process	94 out of 1851 genes, 5.1%	758 out of 10716 genes, 7.1%	1
biological_process	RNA modification	2 out of 1851 genes, 0.1%	66 out of 10716 genes, 0.6%	1
biological_process	regulation of macromolecule metabolic process	17 out of 1851 genes, 0.9%	208 out of 10716 genes, 1.9%	1
biological_process	multicellular organismal development	85 out of 1851 genes, 4.6%	712 out of 10716 genes, 6.6%	1
biological_process	cellular protein localization	4 out of 1851 genes, 0.2%	97 out of 10716 genes, 0.9%	1
biological_process	cellular macromolecule localization	4 out of 1851 genes, 0.2%	97 out of 10716 genes, 0.9%	1
biological_process	intracellular transport	13 out of 1851 genes, 0.7%	184 out of 10716 genes, 1.7%	1
biological_process	cellular macromolecule biosynthetic process	119 out of 1851 genes, 6.4%	949 out of 10716 genes, 8.9%	1
biological_process	regulation of metabolic process	27 out of 1851 genes, 1.5%	302 out of 10716 genes, 2.8%	1
biological_process	vesicle-mediated transport	4 out of 1851 genes, 0.2%	100 out of 10716 genes, 0.9%	1
biological_process	macromolecule biosynthetic process	121 out of 1851 genes, 6.5%	973 out of 10716 genes, 9.1%	1
biological_process	establishment of localization in cell	15 out of 1851 genes, 0.8%	212 out of 10716 genes, 2.0%	1
biological_process	cellular protein metabolic process	218 out of 1851 genes, 11.8%	1622 out of 10716 genes, 15.1%	1
biological_process	RNA processing	10 out of 1851 genes, 0.5%	174 out of 10716 genes, 1.6%	1
biological_process	translation	17 out of 1851 genes, 0.9%	239 out of 10716 genes, 2.2%	1
biological_process	protein transport	14 out of 1851 genes, 0.8%	217 out of 10716 genes, 2.0%	1
biological_process	establishment of protein localization	14 out of 1851 genes, 0.8%	217 out of 10716 genes, 2.0%	1
biological_process	cellular localization	16 out of 1851 genes, 0.9%	236 out of 10716 genes, 2.2%	1
biological_process	ribonucleoprotein complex biogenesis	2 out of 1851 genes, 0.1%	94 out of 10716 genes, 0.9%	1
biological_process	nitrogen compound metabolic process	303 out of 1851 genes, 16.4%	2202 out of 10716 genes, 20.5%	1
biological_process	cellular component biogenesis	14 out of 1851 genes, 0.8%	224 out of 10716 genes, 2.1%	1
biological_process	nucleic acid metabolic process	157 out of 1851 genes, 8.5%	1264 out of 10716 genes, 11.8%	1
biological_process	RNA metabolic process	107 out of 1851 genes, 5.8%	938 out of 10716 genes, 8.8%	1
biological_process	protein localization	14 out of 1851 genes, 0.8%	234 out of 10716 genes, 2.2%	1
biological_process	developmental process involved in reproduction	47 out of 1851 genes, 2.5%	516 out of 10716 genes, 4.8%	1
biological_process	nucleobase-containing compound metabolic process	214 out of 1851 genes, 11.6%	1676 out of 10716 genes, 15.6%	1
biological_process	reproduction	60 out of 1851 genes, 3.2%	619 out of 10716 genes, 5.8%	1
biological_process	cellular nitrogen compound metabolic process	237 out of 1851 genes, 12.8%	1846 out of 10716 genes, 17.2%	1
biological_process	heterocycle metabolic process	240 out of 1851 genes, 13.0%	1873 out of 10716 genes, 17.5%	1
biological_process	reproductive process	52 out of 1851 genes, 2.8%	578 out of 10716 genes, 5.4%	1
biological_process	developmental process	127 out of 1851 genes, 6.9%	1142 out of 10716 genes, 10.7%	1
biological_process	gene expression	140 out of 1851 genes, 7.6%	1460 out of 10716 genes, 13.6%	1
biological_process	cellular macromolecule metabolic process	385 out of 1851 genes, 20.8%	2856 out of 10716 genes, 26.7%	1
biological_process	cellular process	976 out of 1851 genes, 52.7%	6445 out of 10716 genes, 60.1%	1
biological_process	macromolecule metabolic process	529 out of 1851 genes, 28.6%	3777 out of 10716 genes, 35.2%	1
biological_process	cellular metabolic process	726 out of 1851 genes, 39.2%	4986 out of 10716 genes, 46.5%	1
biological_process	organic substance metabolic process	813 out of 1851 genes, 43.9%	5442 out of 10716 genes, 50.8%	1

## Sheet: 2Avs3A
cellular_component	Gene Ontology term	Cluster frequency	Genome frequency of use	Corrected P-value
cellular_component	external encapsulating structure	52 out of 415 genes, 12.5%	327 out of 9574 genes, 3.4%	5.95e-15
cellular_component	cell periphery	54 out of 415 genes, 13.0%	385 out of 9574 genes, 4.0%	3.78e-13
cellular_component	extracellular region	34 out of 415 genes, 8.2%	250 out of 9574 genes, 2.6%	1.1e-07
cellular_component	cell wall	23 out of 415 genes, 5.5%	139 out of 9574 genes, 1.5%	1.17e-06
cellular_component	intrinsic to membrane	78 out of 415 genes, 18.8%	1133 out of 9574 genes, 11.8%	0.00078
cellular_component	anchored to membrane	8 out of 415 genes, 1.9%	33 out of 9574 genes, 0.3%	0.00285
cellular_component	membrane part	79 out of 415 genes, 19.0%	1391 out of 9574 genes, 14.5%	0.2731
cellular_component	cytoplasmic vesicle	27 out of 415 genes, 6.5%	433 out of 9574 genes, 4.5%	1
cellular_component	vesicle	27 out of 415 genes, 6.5%	438 out of 9574 genes, 4.6%	1
cellular_component	plant-type vacuole	4 out of 415 genes, 1.0%	44 out of 9574 genes, 0.5%	1
cellular_component	integral to membrane	4 out of 415 genes, 1.0%	49 out of 9574 genes, 0.5%	1
cellular_component	cell projection	2 out of 415 genes, 0.5%	17 out of 9574 genes, 0.2%	1
cellular_component	vacuole	5 out of 415 genes, 1.2%	74 out of 9574 genes, 0.8%	1
cellular_component	membrane	122 out of 415 genes, 29.4%	2752 out of 9574 genes, 28.7%	1
cellular_component	microtubule cytoskeleton	5 out of 415 genes, 1.2%	118 out of 9574 genes, 1.2%	1
cellular_component	microbody	5 out of 415 genes, 1.2%	139 out of 9574 genes, 1.5%	1
cellular_component	cytoskeleton	6 out of 415 genes, 1.4%	174 out of 9574 genes, 1.8%	1
cellular_component	ubiquitin ligase complex	2 out of 415 genes, 0.5%	112 out of 9574 genes, 1.2%	1
cellular_component	organelle membrane	13 out of 415 genes, 3.1%	608 out of 9574 genes, 6.4%	1
cellular_component	non-membrane-bounded organelle	8 out of 415 genes, 1.9%	449 out of 9574 genes, 4.7%	1
cellular_component	intracellular non-membrane-bounded organelle	8 out of 415 genes, 1.9%	449 out of 9574 genes, 4.7%	1
cellular_component	nuclear lumen	2 out of 415 genes, 0.5%	233 out of 9574 genes, 2.4%	1
cellular_component	organelle lumen	2 out of 415 genes, 0.5%	233 out of 9574 genes, 2.4%	1
cellular_component	intracellular organelle lumen	2 out of 415 genes, 0.5%	233 out of 9574 genes, 2.4%	1
cellular_component	membrane-enclosed lumen	2 out of 415 genes, 0.5%	239 out of 9574 genes, 2.5%	1
cellular_component	nucleus	3 out of 415 genes, 0.7%	296 out of 9574 genes, 3.1%	1
cellular_component	nuclear part	2 out of 415 genes, 0.5%	279 out of 9574 genes, 2.9%	1
cellular_component	plastid envelope	3 out of 415 genes, 0.7%	355 out of 9574 genes, 3.7%	1
cellular_component	cell	307 out of 415 genes, 74.0%	7912 out of 9574 genes, 82.6%	1
cellular_component	cell part	307 out of 415 genes, 74.0%	7912 out of 9574 genes, 82.6%	1
cellular_component	protein complex	11 out of 415 genes, 2.7%	753 out of 9574 genes, 7.9%	1
cellular_component	organelle envelope	4 out of 415 genes, 1.0%	563 out of 9574 genes, 5.9%	1
cellular_component	envelope	4 out of 415 genes, 1.0%	571 out of 9574 genes, 6.0%	1
cellular_component	intracellular	201 out of 415 genes, 48.4%	6756 out of 9574 genes, 70.6%	1
cellular_component	cytoplasm	64 out of 415 genes, 15.4%	3024 out of 9574 genes, 31.6%	1
cellular_component	plastid	21 out of 415 genes, 5.1%	1831 out of 9574 genes, 19.1%	1
cellular_component	macromolecular complex	15 out of 415 genes, 3.6%	1215 out of 9574 genes, 12.7%	1
cellular_component	organelle	185 out of 415 genes, 44.6%	5962 out of 9574 genes, 62.3%	1
cellular_component	membrane-bounded organelle	154 out of 415 genes, 37.1%	5407 out of 9574 genes, 56.5%	1
cellular_component	intracellular organelle	177 out of 415 genes, 42.7%	5874 out of 9574 genes, 61.4%	1
cellular_component	intracellular membrane-bounded organelle	146 out of 415 genes, 35.2%	5273 out of 9574 genes, 55.1%	1
cellular_component	organelle part	19 out of 415 genes, 4.6%	1789 out of 9574 genes, 18.7%	1
cellular_component	intracellular part	201 out of 415 genes, 48.4%	6730 out of 9574 genes, 70.3%	1
cellular_component	plastid part	3 out of 415 genes, 0.7%	787 out of 9574 genes, 8.2%	1
cellular_component	cytoplasmic part	64 out of 415 genes, 15.4%	3016 out of 9574 genes, 31.5%	1
cellular_component	intracellular organelle part	8 out of 415 genes, 1.9%	1552 out of 9574 genes, 16.2%	1
molecular_function	hydrolase activity, acting on glycosyl bonds	52 out of 697 genes, 7.5%	452 out of 12888 genes, 3.5%	3.39e-05
molecular_function	transferase activity, transferring glycosyl groups	53 out of 697 genes, 7.6%	476 out of 12888 genes, 3.7%	7.35e-05
molecular_function	iron ion binding	46 out of 697 genes, 6.6%	388 out of 12888 genes, 3.0%	7.46e-05
molecular_function	catalytic activity	531 out of 697 genes, 76.2%	8776 out of 12888 genes, 68.1%	0.00015
molecular_function	antioxidant activity	20 out of 697 genes, 2.9%	135 out of 12888 genes, 1.0%	0.00666
molecular_function	secondary active transmembrane transporter activity	19 out of 697 genes, 2.7%	134 out of 12888 genes, 1.0%	0.01898
molecular_function	oxidoreductase activity	125 out of 697 genes, 17.9%	1713 out of 12888 genes, 13.3%	0.03869
molecular_function	carboxylesterase activity	18 out of 697 genes, 2.6%	139 out of 12888 genes, 1.1%	0.08938
molecular_function	oxidoreductase activity, acting on single donors with incorporation of molecular oxygen	14 out of 697 genes, 2.0%	94 out of 12888 genes, 0.7%	0.0902
molecular_function	carboxylic ester hydrolase activity	18 out of 697 genes, 2.6%	141 out of 12888 genes, 1.1%	0.10629
molecular_function	cellulose synthase activity	8 out of 697 genes, 1.1%	37 out of 12888 genes, 0.3%	0.12064
molecular_function	oxidoreductase activity, acting on paired donors, with incorporation or reduction of molecular oxygen	25 out of 697 genes, 3.6%	236 out of 12888 genes, 1.8%	0.18046
molecular_function	nucleic acid binding transcription factor activity	33 out of 697 genes, 4.7%	352 out of 12888 genes, 2.7%	0.26316
molecular_function	carboxypeptidase activity	9 out of 697 genes, 1.3%	51 out of 12888 genes, 0.4%	0.26622
molecular_function	hydrolase activity	182 out of 697 genes, 26.1%	2778 out of 12888 genes, 21.6%	0.33083
molecular_function	peptidase regulator activity	5 out of 697 genes, 0.7%	18 out of 12888 genes, 0.1%	0.38996
molecular_function	endopeptidase regulator activity	5 out of 697 genes, 0.7%	18 out of 12888 genes, 0.1%	0.38996
molecular_function	glucosyltransferase activity	15 out of 697 genes, 2.2%	124 out of 12888 genes, 1.0%	0.50522
molecular_function	transferase activity, transferring acyl groups	26 out of 697 genes, 3.7%	276 out of 12888 genes, 2.1%	0.75284
molecular_function	monooxygenase activity	21 out of 697 genes, 3.0%	212 out of 12888 genes, 1.6%	0.97453
molecular_function	dioxygenase activity	13 out of 697 genes, 1.9%	111 out of 12888 genes, 0.9%	1
molecular_function	transferase activity, transferring acyl groups other than amino-acyl groups	23 out of 697 genes, 3.3%	246 out of 12888 genes, 1.9%	1
molecular_function	beta-1,4-mannosyltransferase activity	2 out of 697 genes, 0.3%	3 out of 12888 genes, 0.0%	1
molecular_function	enzyme regulator activity	15 out of 697 genes, 2.2%	140 out of 12888 genes, 1.1%	1
molecular_function	endopeptidase inhibitor activity	3 out of 697 genes, 0.4%	10 out of 12888 genes, 0.1%	1
molecular_function	peptidase inhibitor activity	3 out of 697 genes, 0.4%	10 out of 12888 genes, 0.1%	1
molecular_function	hydrolase activity, hydrolyzing O-glycosyl compounds	27 out of 697 genes, 3.9%	320 out of 12888 genes, 2.5%	1
molecular_function	oxidoreductase activity, acting on paired donors, with incorporation or reduction of molecular oxygen, reduced iron-sulfur protein as one donor, and incorporation of one atom of oxygen	2 out of 697 genes, 0.3%	4 out of 12888 genes, 0.0%	1
molecular_function	phosphoric diester hydrolase activity	4 out of 697 genes, 0.6%	20 out of 12888 genes, 0.2%	1
molecular_function	oxidoreductase activity, acting on diphenols and related substances as donors, oxygen as acceptor	9 out of 697 genes, 1.3%	76 out of 12888 genes, 0.6%	1
molecular_function	phospholipase C activity	3 out of 697 genes, 0.4%	12 out of 12888 genes, 0.1%	1
molecular_function	ion binding	164 out of 697 genes, 23.5%	2643 out of 12888 genes, 20.5%	1
molecular_function	phospholipase activity	6 out of 697 genes, 0.9%	43 out of 12888 genes, 0.3%	1
molecular_function	oxidoreductase activity, acting on paired donors, with incorporation or reduction of molecular oxygen, 2-oxoglutarate as one donor, and incorporation of one atom each of oxygen into both donors	9 out of 697 genes, 1.3%	82 out of 12888 genes, 0.6%	1
molecular_function	steroid dehydrogenase activity, acting on the CH-OH group of donors, NAD or NADP as acceptor	4 out of 697 genes, 0.6%	23 out of 12888 genes, 0.2%	1
molecular_function	oxidoreductase activity, acting on diphenols and related substances as donors	9 out of 697 genes, 1.3%	83 out of 12888 genes, 0.6%	1
molecular_function	glucosidase activity	8 out of 697 genes, 1.1%	72 out of 12888 genes, 0.6%	1
molecular_function	steroid dehydrogenase activity	4 out of 697 genes, 0.6%	25 out of 12888 genes, 0.2%	1
molecular_function	lipase activity	6 out of 697 genes, 0.9%	48 out of 12888 genes, 0.4%	1
molecular_function	enzyme inhibitor activity	3 out of 697 genes, 0.4%	15 out of 12888 genes, 0.1%	1
molecular_function	acylglycerol O-acyltransferase activity	3 out of 697 genes, 0.4%	15 out of 12888 genes, 0.1%	1
molecular_function	active transmembrane transporter activity	26 out of 697 genes, 3.7%	338 out of 12888 genes, 2.6%	1
molecular_function	hydrolase activity, acting on ester bonds	48 out of 697 genes, 6.9%	698 out of 12888 genes, 5.4%	1
molecular_function	terpene synthase activity	2 out of 697 genes, 0.3%	7 out of 12888 genes, 0.1%	1
molecular_function	xylosyltransferase activity	2 out of 697 genes, 0.3%	7 out of 12888 genes, 0.1%	1
molecular_function	oxidoreductase activity, acting on paired donors, with incorporation or reduction of molecular oxygen, reduced flavin or flavoprotein as one donor, and incorporation of one atom of oxygen	3 out of 697 genes, 0.4%	17 out of 12888 genes, 0.1%	1
molecular_function	oxidoreductase activity, acting on single donors with incorporation of molecular oxygen, incorporation of two atoms of oxygen	4 out of 697 genes, 0.6%	29 out of 12888 genes, 0.2%	1
molecular_function	cation binding	147 out of 697 genes, 21.1%	2443 out of 12888 genes, 19.0%	1
molecular_function	mannosyltransferase activity	2 out of 697 genes, 0.3%	9 out of 12888 genes, 0.1%	1
molecular_function	water transmembrane transporter activity	2 out of 697 genes, 0.3%	9 out of 12888 genes, 0.1%	1
molecular_function	exopeptidase activity	9 out of 697 genes, 1.3%	98 out of 12888 genes, 0.8%	1
molecular_function	UDP-glycosyltransferase activity	14 out of 697 genes, 2.0%	176 out of 12888 genes, 1.4%	1
molecular_function	metal ion binding	131 out of 697 genes, 18.8%	2182 out of 12888 genes, 16.9%	1
molecular_function	O-acyltransferase activity	4 out of 697 genes, 0.6%	34 out of 12888 genes, 0.3%	1
molecular_function	CoA-ligase activity	3 out of 697 genes, 0.4%	22 out of 12888 genes, 0.2%	1
molecular_function	oxidoreductase activity, acting on NAD(P)H, oxygen as acceptor	2 out of 697 genes, 0.3%	11 out of 12888 genes, 0.1%	1
molecular_function	transition metal ion binding	94 out of 697 genes, 13.5%	1554 out of 12888 genes, 12.1%	1
molecular_function	oxidoreductase activity, acting on paired donors, with incorporation or reduction of molecular oxygen, NAD(P)H as one donor, and incorporation of one atom of oxygen	8 out of 697 genes, 1.1%	95 out of 12888 genes, 0.7%	1
molecular_function	transmembrane transporter activity	49 out of 697 genes, 7.0%	783 out of 12888 genes, 6.1%	1
molecular_function	galactosidase activity	4 out of 697 genes, 0.6%	40 out of 12888 genes, 0.3%	1
molecular_function	peptidase activity	30 out of 697 genes, 4.3%	464 out of 12888 genes, 3.6%	1
molecular_function	antiporter activity	3 out of 697 genes, 0.4%	27 out of 12888 genes, 0.2%	1
molecular_function	fatty acid synthase activity	3 out of 697 genes, 0.4%	28 out of 12888 genes, 0.2%	1
molecular_function	oxidoreductase activity, acting on single donors with incorporation of molecular oxygen, incorporation of one atom of oxygen (internal monooxygenases or internal mixed function oxidases)	2 out of 697 genes, 0.3%	15 out of 12888 genes, 0.1%	1
molecular_function	alkali metal ion binding	2 out of 697 genes, 0.3%	15 out of 12888 genes, 0.1%	1
molecular_function	oxidoreductase activity, acting on the aldehyde or oxo group of donors	6 out of 697 genes, 0.9%	72 out of 12888 genes, 0.6%	1
molecular_function	inorganic anion transmembrane transporter activity	3 out of 697 genes, 0.4%	29 out of 12888 genes, 0.2%	1
molecular_function	ligase activity, forming carbon-sulfur bonds	3 out of 697 genes, 0.4%	30 out of 12888 genes, 0.2%	1
molecular_function	endopeptidase activity	17 out of 697 genes, 2.4%	256 out of 12888 genes, 2.0%	1
molecular_function	solute:hydrogen antiporter activity	2 out of 697 genes, 0.3%	17 out of 12888 genes, 0.1%	1
molecular_function	carbon-oxygen lyase activity, acting on phosphates	2 out of 697 genes, 0.3%	17 out of 12888 genes, 0.1%	1
molecular_function	UDP-glucosyltransferase activity	6 out of 697 genes, 0.9%	77 out of 12888 genes, 0.6%	1
molecular_function	peptidase activity, acting on L-amino acid peptides	28 out of 697 genes, 4.0%	450 out of 12888 genes, 3.5%	1
molecular_function	organic phosphonate transmembrane transporter activity	3 out of 697 genes, 0.4%	32 out of 12888 genes, 0.2%	1
molecular_function	anion transmembrane transporter activity	5 out of 697 genes, 0.7%	64 out of 12888 genes, 0.5%	1
molecular_function	peroxidase activity	2 out of 697 genes, 0.3%	19 out of 12888 genes, 0.1%	1
molecular_function	oxidoreductase activity, acting on peroxide as acceptor	2 out of 697 genes, 0.3%	19 out of 12888 genes, 0.1%	1
molecular_function	racemase and epimerase activity, acting on carbohydrates and derivatives	2 out of 697 genes, 0.3%	19 out of 12888 genes, 0.1%	1
molecular_function	phosphoric ester hydrolase activity	20 out of 697 genes, 2.9%	319 out of 12888 genes, 2.5%	1
molecular_function	oxidoreductase activity, acting on the CH-OH group of donors, NAD or NADP as acceptor	12 out of 697 genes, 1.7%	183 out of 12888 genes, 1.4%	1
molecular_function	transferase activity, transferring pentosyl groups	3 out of 697 genes, 0.4%	35 out of 12888 genes, 0.3%	1
molecular_function	receptor binding	2 out of 697 genes, 0.3%	21 out of 12888 genes, 0.2%	1
molecular_function	solute:cation antiporter activity	2 out of 697 genes, 0.3%	21 out of 12888 genes, 0.2%	1
molecular_function	transferase activity, transferring aldehyde or ketonic groups	2 out of 697 genes, 0.3%	21 out of 12888 genes, 0.2%	1
molecular_function	oxidoreductase activity, acting on CH-OH group of donors	14 out of 697 genes, 2.0%	224 out of 12888 genes, 1.7%	1
molecular_function	hydro-lyase activity	5 out of 697 genes, 0.7%	74 out of 12888 genes, 0.6%	1
molecular_function	carbohydrate phosphatase activity	2 out of 697 genes, 0.3%	24 out of 12888 genes, 0.2%	1
molecular_function	methyltransferase activity	12 out of 697 genes, 1.7%	199 out of 12888 genes, 1.5%	1
molecular_function	transporter activity	52 out of 697 genes, 7.5%	921 out of 12888 genes, 7.1%	1
molecular_function	beta-glucosidase activity	2 out of 697 genes, 0.3%	25 out of 12888 genes, 0.2%	1
molecular_function	carbon-oxygen lyase activity	8 out of 697 genes, 1.1%	131 out of 12888 genes, 1.0%	1
molecular_function	oxidoreductase activity, acting on the CH-CH group of donors, NAD or NADP as acceptor	14 out of 697 genes, 2.0%	240 out of 12888 genes, 1.9%	1
molecular_function	racemase and epimerase activity	2 out of 697 genes, 0.3%	27 out of 12888 genes, 0.2%	1
molecular_function	carbon-nitrogen lyase activity	2 out of 697 genes, 0.3%	28 out of 12888 genes, 0.2%	1
molecular_function	carboxylic acid binding	3 out of 697 genes, 0.4%	46 out of 12888 genes, 0.4%	1
molecular_function	anion binding	3 out of 697 genes, 0.4%	47 out of 12888 genes, 0.4%	1
molecular_function	hydrogen ion transmembrane transporter activity	4 out of 697 genes, 0.6%	67 out of 12888 genes, 0.5%	1
molecular_function	cytoskeletal protein binding	5 out of 697 genes, 0.7%	88 out of 12888 genes, 0.7%	1
molecular_function	amine transmembrane transporter activity	2 out of 697 genes, 0.3%	32 out of 12888 genes, 0.2%	1
molecular_function	carbohydrate transmembrane transporter activity	2 out of 697 genes, 0.3%	32 out of 12888 genes, 0.2%	1
molecular_function	carbohydrate transporter activity	2 out of 697 genes, 0.3%	32 out of 12888 genes, 0.2%	1
molecular_function	phospholipid binding	3 out of 697 genes, 0.4%	51 out of 12888 genes, 0.4%	1
molecular_function	galactosyltransferase activity	2 out of 697 genes, 0.3%	33 out of 12888 genes, 0.3%	1
molecular_function	O-methyltransferase activity	2 out of 697 genes, 0.3%	35 out of 12888 genes, 0.3%	1
molecular_function	DNA binding	17 out of 697 genes, 2.4%	322 out of 12888 genes, 2.5%	1
molecular_function	organic acid transmembrane transporter activity	2 out of 697 genes, 0.3%	37 out of 12888 genes, 0.3%	1
molecular_function	lyase activity	19 out of 697 genes, 2.7%	368 out of 12888 genes, 2.9%	1
molecular_function	vitamin binding	2 out of 697 genes, 0.3%	40 out of 12888 genes, 0.3%	1
molecular_function	phosphatase activity	14 out of 697 genes, 2.0%	280 out of 12888 genes, 2.2%	1
molecular_function	enzyme binding	3 out of 697 genes, 0.4%	63 out of 12888 genes, 0.5%	1
molecular_function	N-acetyltransferase activity	2 out of 697 genes, 0.3%	42 out of 12888 genes, 0.3%	1
molecular_function	hydrolase activity, acting on acid anhydrides, catalyzing transmembrane movement of substances	7 out of 697 genes, 1.0%	145 out of 12888 genes, 1.1%	1
molecular_function	oxidoreductase activity, acting on the aldehyde or oxo group of donors, NAD or NADP as acceptor	2 out of 697 genes, 0.3%	43 out of 12888 genes, 0.3%	1
molecular_function	oxidoreductase activity, acting on the CH-CH group of donors	14 out of 697 genes, 2.0%	288 out of 12888 genes, 2.2%	1
molecular_function	coenzyme binding	7 out of 697 genes, 1.0%	150 out of 12888 genes, 1.2%	1
molecular_function	transferase activity, transferring alkyl or aryl (other than methyl) groups	4 out of 697 genes, 0.6%	89 out of 12888 genes, 0.7%	1
molecular_function	carboxy-lyase activity	3 out of 697 genes, 0.4%	70 out of 12888 genes, 0.5%	1
molecular_function	carbohydrate binding	4 out of 697 genes, 0.6%	92 out of 12888 genes, 0.7%	1
molecular_function	transferase activity	158 out of 697 genes, 22.7%	3047 out of 12888 genes, 23.6%	1
molecular_function	N-acyltransferase activity	2 out of 697 genes, 0.3%	49 out of 12888 genes, 0.4%	1
molecular_function	lipid binding	3 out of 697 genes, 0.4%	72 out of 12888 genes, 0.6%	1
molecular_function	acetyltransferase activity	3 out of 697 genes, 0.4%	75 out of 12888 genes, 0.6%	1
molecular_function	transferase activity, transferring one-carbon groups	15 out of 697 genes, 2.2%	328 out of 12888 genes, 2.5%	1
molecular_function	small GTPase regulator activity	2 out of 697 genes, 0.3%	53 out of 12888 genes, 0.4%	1
molecular_function	substrate-specific transmembrane transporter activity	26 out of 697 genes, 3.7%	552 out of 12888 genes, 4.3%	1
molecular_function	GTPase regulator activity	2 out of 697 genes, 0.3%	56 out of 12888 genes, 0.4%	1
molecular_function	nucleoside-triphosphatase regulator activity	2 out of 697 genes, 0.3%	56 out of 12888 genes, 0.4%	1
molecular_function	acid-amino acid ligase activity	5 out of 697 genes, 0.7%	128 out of 12888 genes, 1.0%	1
molecular_function	S-adenosylmethionine-dependent methyltransferase activity	2 out of 697 genes, 0.3%	60 out of 12888 genes, 0.5%	1
molecular_function	cofactor binding	19 out of 697 genes, 2.7%	429 out of 12888 genes, 3.3%	1
molecular_function	carbon-carbon lyase activity	4 out of 697 genes, 0.6%	111 out of 12888 genes, 0.9%	1
molecular_function	ion transmembrane transporter activity	18 out of 697 genes, 2.6%	413 out of 12888 genes, 3.2%	1
molecular_function	ligase activity, forming carbon-nitrogen bonds	8 out of 697 genes, 1.1%	206 out of 12888 genes, 1.6%	1
molecular_function	intramolecular transferase activity	2 out of 697 genes, 0.3%	66 out of 12888 genes, 0.5%	1
molecular_function	ATPase activity, coupled to transmembrane movement of substances	5 out of 697 genes, 0.7%	140 out of 12888 genes, 1.1%	1
molecular_function	ATPase activity, coupled to movement of substances	5 out of 697 genes, 0.7%	141 out of 12888 genes, 1.1%	1
molecular_function	isomerase activity	10 out of 697 genes, 1.4%	254 out of 12888 genes, 2.0%	1
molecular_function	oxidoreductase activity, acting on NAD(P)H	3 out of 697 genes, 0.4%	94 out of 12888 genes, 0.7%	1
molecular_function	ligase activity	14 out of 697 genes, 2.0%	360 out of 12888 genes, 2.8%	1
molecular_function	small conjugating protein ligase activity	3 out of 697 genes, 0.4%	106 out of 12888 genes, 0.8%	1
molecular_function	hydrolase activity, acting on carbon-nitrogen (but not peptide) bonds	2 out of 697 genes, 0.3%	81 out of 12888 genes, 0.6%	1
molecular_function	monovalent inorganic cation transmembrane transporter activity	4 out of 697 genes, 0.6%	135 out of 12888 genes, 1.0%	1
molecular_function	substrate-specific transporter activity	27 out of 697 genes, 3.9%	652 out of 12888 genes, 5.1%	1
molecular_function	primary active transmembrane transporter activity	5 out of 697 genes, 0.7%	172 out of 12888 genes, 1.3%	1
molecular_function	P-P-bond-hydrolysis-driven transmembrane transporter activity	5 out of 697 genes, 0.7%	172 out of 12888 genes, 1.3%	1
molecular_function	phosphoprotein phosphatase activity	3 out of 697 genes, 0.4%	122 out of 12888 genes, 0.9%	1
molecular_function	ATPase activity, coupled to transmembrane movement of ions	2 out of 697 genes, 0.3%	98 out of 12888 genes, 0.8%	1
molecular_function	metal ion transmembrane transporter activity	2 out of 697 genes, 0.3%	106 out of 12888 genes, 0.8%	1
molecular_function	inorganic cation transmembrane transporter activity	4 out of 697 genes, 0.6%	169 out of 12888 genes, 1.3%	1
molecular_function	nuclease activity	2 out of 697 genes, 0.3%	111 out of 12888 genes, 0.9%	1
molecular_function	ATPase activity	9 out of 697 genes, 1.3%	331 out of 12888 genes, 2.6%	1
molecular_function	cation transmembrane transporter activity	7 out of 697 genes, 1.0%	281 out of 12888 genes, 2.2%	1
molecular_function	ATPase activity, coupled	8 out of 697 genes, 1.1%	311 out of 12888 genes, 2.4%	1
molecular_function	guanyl nucleotide binding	4 out of 697 genes, 0.6%	221 out of 12888 genes, 1.7%	1
molecular_function	guanyl ribonucleotide binding	4 out of 697 genes, 0.6%	221 out of 12888 genes, 1.7%	1
molecular_function	hydrolase activity, acting on acid anhydrides	28 out of 697 genes, 4.0%	839 out of 12888 genes, 6.5%	1
molecular_function	nucleoside-triphosphatase activity	24 out of 697 genes, 3.4%	751 out of 12888 genes, 5.8%	1
molecular_function	protein binding	24 out of 697 genes, 3.4%	757 out of 12888 genes, 5.9%	1
molecular_function	molecular transducer activity	6 out of 697 genes, 0.9%	298 out of 12888 genes, 2.3%	1
molecular_function	signal transducer activity	4 out of 697 genes, 0.6%	255 out of 12888 genes, 2.0%	1
molecular_function	pyrophosphatase activity	25 out of 697 genes, 3.6%	824 out of 12888 genes, 6.4%	1
molecular_function	nucleic acid binding	53 out of 697 genes, 7.6%	1465 out of 12888 genes, 11.4%	1
molecular_function	hydrolase activity, acting on acid anhydrides, in phosphorus-containing anhydrides	25 out of 697 genes, 3.6%	828 out of 12888 genes, 6.4%	1
molecular_function	protein kinase activity	28 out of 697 genes, 4.0%	908 out of 12888 genes, 7.0%	1
molecular_function	protein serine/threonine kinase activity	4 out of 697 genes, 0.6%	270 out of 12888 genes, 2.1%	1
molecular_function	phosphotransferase activity, alcohol group as acceptor	29 out of 697 genes, 4.2%	962 out of 12888 genes, 7.5%	1
molecular_function	kinase activity	37 out of 697 genes, 5.3%	1207 out of 12888 genes, 9.4%	1
molecular_function	transferase activity, transferring phosphorus-containing groups	44 out of 697 genes, 6.3%	1527 out of 12888 genes, 11.8%	1
molecular_function	binding	342 out of 697 genes, 49.1%	7740 out of 12888 genes, 60.1%	1
molecular_function	adenyl ribonucleotide binding	38 out of 697 genes, 5.5%	1606 out of 12888 genes, 12.5%	1
molecular_function	organic cyclic compound binding	117 out of 697 genes, 16.8%	3655 out of 12888 genes, 28.4%	1
molecular_function	adenyl nucleotide binding	38 out of 697 genes, 5.5%	1607 out of 12888 genes, 12.5%	1
molecular_function	heterocyclic compound binding	117 out of 697 genes, 16.8%	3652 out of 12888 genes, 28.3%	1
molecular_function	small molecule binding	67 out of 697 genes, 9.6%	2393 out of 12888 genes, 18.6%	1
molecular_function	nucleotide binding	65 out of 697 genes, 9.3%	2333 out of 12888 genes, 18.1%	1
molecular_function	nucleoside phosphate binding	65 out of 697 genes, 9.3%	2333 out of 12888 genes, 18.1%	1
molecular_function	purine nucleotide binding	42 out of 697 genes, 6.0%	1820 out of 12888 genes, 14.1%	1
molecular_function	ribonucleotide binding	42 out of 697 genes, 6.0%	1819 out of 12888 genes, 14.1%	1
molecular_function	purine ribonucleotide binding	42 out of 697 genes, 6.0%	1819 out of 12888 genes, 14.1%	1
biological_process	external encapsulating structure organization	25 out of 582 genes, 4.3%	158 out of 10716 genes, 1.5%	0.00049
biological_process	polysaccharide metabolic process	28 out of 582 genes, 4.8%	194 out of 10716 genes, 1.8%	0.00076
biological_process	cell wall organization or biogenesis	17 out of 582 genes, 2.9%	99 out of 10716 genes, 0.9%	0.00834
biological_process	cell wall organization	13 out of 582 genes, 2.2%	64 out of 10716 genes, 0.6%	0.01256
biological_process	carbohydrate metabolic process	41 out of 582 genes, 7.0%	470 out of 10716 genes, 4.4%	0.69164
biological_process	secondary metabolic process	19 out of 582 genes, 3.3%	168 out of 10716 genes, 1.6%	0.75377
biological_process	fluid transport	2 out of 582 genes, 0.3%	2 out of 10716 genes, 0.0%	1
biological_process	drug transport	7 out of 582 genes, 1.2%	47 out of 10716 genes, 0.4%	1
biological_process	response to drug	7 out of 582 genes, 1.2%	47 out of 10716 genes, 0.4%	1
biological_process	phenylpropanoid metabolic process	15 out of 582 genes, 2.6%	146 out of 10716 genes, 1.4%	1
biological_process	glycerol-3-phosphate metabolic process	2 out of 582 genes, 0.3%	4 out of 10716 genes, 0.0%	1
biological_process	fatty acid metabolic process	17 out of 582 genes, 2.9%	183 out of 10716 genes, 1.7%	1
biological_process	lipid metabolic process	34 out of 582 genes, 5.8%	441 out of 10716 genes, 4.1%	1
biological_process	plant-type cell wall organization or biogenesis	5 out of 582 genes, 0.9%	31 out of 10716 genes, 0.3%	1
biological_process	inositol metabolic process	2 out of 582 genes, 0.3%	5 out of 10716 genes, 0.0%	1
biological_process	phenylpropanoid biosynthetic process	10 out of 582 genes, 1.7%	92 out of 10716 genes, 0.9%	1
biological_process	root epidermal cell differentiation	3 out of 582 genes, 0.5%	13 out of 10716 genes, 0.1%	1
biological_process	aromatic amino acid family metabolic process	5 out of 582 genes, 0.9%	34 out of 10716 genes, 0.3%	1
biological_process	secondary metabolite biosynthetic process	10 out of 582 genes, 1.7%	96 out of 10716 genes, 0.9%	1
biological_process	cell fate specification	2 out of 582 genes, 0.3%	6 out of 10716 genes, 0.1%	1
biological_process	toxin metabolic process	2 out of 582 genes, 0.3%	6 out of 10716 genes, 0.1%	1
biological_process	alditol phosphate metabolic process	2 out of 582 genes, 0.3%	6 out of 10716 genes, 0.1%	1
biological_process	epidermal cell differentiation	5 out of 582 genes, 0.9%	35 out of 10716 genes, 0.3%	1
biological_process	root system development	8 out of 582 genes, 1.4%	72 out of 10716 genes, 0.7%	1
biological_process	root development	8 out of 582 genes, 1.4%	72 out of 10716 genes, 0.7%	1
biological_process	L-phenylalanine metabolic process	3 out of 582 genes, 0.5%	15 out of 10716 genes, 0.1%	1
biological_process	jasmonic acid metabolic process	3 out of 582 genes, 0.5%	15 out of 10716 genes, 0.1%	1
biological_process	programmed cell death	7 out of 582 genes, 1.2%	61 out of 10716 genes, 0.6%	1
biological_process	response to stress	67 out of 582 genes, 11.5%	1014 out of 10716 genes, 9.5%	1
biological_process	negative regulation of molecular function	6 out of 582 genes, 1.0%	50 out of 10716 genes, 0.5%	1
biological_process	epidermis development	5 out of 582 genes, 0.9%	38 out of 10716 genes, 0.4%	1
biological_process	monocarboxylic acid metabolic process	20 out of 582 genes, 3.4%	250 out of 10716 genes, 2.3%	1
biological_process	response to light intensity	5 out of 582 genes, 0.9%	39 out of 10716 genes, 0.4%	1
biological_process	cell death	7 out of 582 genes, 1.2%	65 out of 10716 genes, 0.6%	1
biological_process	death	7 out of 582 genes, 1.2%	65 out of 10716 genes, 0.6%	1
biological_process	response to endogenous stimulus	31 out of 582 genes, 5.3%	430 out of 10716 genes, 4.0%	1
biological_process	negative regulation of peptidase activity	2 out of 582 genes, 0.3%	8 out of 10716 genes, 0.1%	1
biological_process	regulation of peptidase activity	2 out of 582 genes, 0.3%	8 out of 10716 genes, 0.1%	1
biological_process	glucan biosynthetic process	6 out of 582 genes, 1.0%	54 out of 10716 genes, 0.5%	1
biological_process	response to organic substance	35 out of 582 genes, 6.0%	508 out of 10716 genes, 4.7%	1
biological_process	plant-type cell wall organization	3 out of 582 genes, 0.5%	20 out of 10716 genes, 0.2%	1
biological_process	response to stimulus	136 out of 582 genes, 23.4%	2264 out of 10716 genes, 21.1%	1
biological_process	anthocyanin-containing compound biosynthetic process	2 out of 582 genes, 0.3%	10 out of 10716 genes, 0.1%	1
biological_process	anthocyanin-containing compound metabolic process	2 out of 582 genes, 0.3%	10 out of 10716 genes, 0.1%	1
biological_process	auxin transport	4 out of 582 genes, 0.7%	33 out of 10716 genes, 0.3%	1
biological_process	response to reactive oxygen species	3 out of 582 genes, 0.5%	21 out of 10716 genes, 0.2%	1
biological_process	cellular carbohydrate metabolic process	14 out of 582 genes, 2.4%	179 out of 10716 genes, 1.7%	1
biological_process	transcription, DNA-dependent	39 out of 582 genes, 6.7%	587 out of 10716 genes, 5.5%	1
biological_process	RNA biosynthetic process	39 out of 582 genes, 6.7%	587 out of 10716 genes, 5.5%	1
biological_process	hormone transport	4 out of 582 genes, 0.7%	34 out of 10716 genes, 0.3%	1
biological_process	response to hormone stimulus	28 out of 582 genes, 4.8%	405 out of 10716 genes, 3.8%	1
biological_process	response to water deprivation	2 out of 582 genes, 0.3%	11 out of 10716 genes, 0.1%	1
biological_process	trichoblast differentiation	2 out of 582 genes, 0.3%	11 out of 10716 genes, 0.1%	1
biological_process	negative regulation of catalytic activity	2 out of 582 genes, 0.3%	11 out of 10716 genes, 0.1%	1
biological_process	negative regulation of hydrolase activity	2 out of 582 genes, 0.3%	11 out of 10716 genes, 0.1%	1
biological_process	lignin metabolic process	5 out of 582 genes, 0.9%	48 out of 10716 genes, 0.4%	1
biological_process	response to carbohydrate stimulus	7 out of 582 genes, 1.2%	76 out of 10716 genes, 0.7%	1
biological_process	cellular lipid metabolic process	26 out of 582 genes, 4.5%	376 out of 10716 genes, 3.5%	1
biological_process	fatty acid biosynthetic process	5 out of 582 genes, 0.9%	49 out of 10716 genes, 0.5%	1
biological_process	polyol metabolic process	3 out of 582 genes, 0.5%	23 out of 10716 genes, 0.2%	1
biological_process	tryptophan metabolic process	2 out of 582 genes, 0.3%	12 out of 10716 genes, 0.1%	1
biological_process	indolalkylamine metabolic process	2 out of 582 genes, 0.3%	12 out of 10716 genes, 0.1%	1
biological_process	thiamine metabolic process	2 out of 582 genes, 0.3%	12 out of 10716 genes, 0.1%	1
biological_process	response to hexose stimulus	2 out of 582 genes, 0.3%	12 out of 10716 genes, 0.1%	1
biological_process	plant-type cell wall biogenesis	2 out of 582 genes, 0.3%	12 out of 10716 genes, 0.1%	1
biological_process	response to monosaccharide stimulus	2 out of 582 genes, 0.3%	12 out of 10716 genes, 0.1%	1
biological_process	cell fate commitment	2 out of 582 genes, 0.3%	12 out of 10716 genes, 0.1%	1
biological_process	single-organism biosynthetic process	21 out of 582 genes, 3.6%	302 out of 10716 genes, 2.8%	1
biological_process	lipid localization	5 out of 582 genes, 0.9%	52 out of 10716 genes, 0.5%	1
biological_process	cellular developmental process	17 out of 582 genes, 2.9%	238 out of 10716 genes, 2.2%	1
biological_process	amine transport	2 out of 582 genes, 0.3%	13 out of 10716 genes, 0.1%	1
biological_process	thiamine-containing compound metabolic process	2 out of 582 genes, 0.3%	13 out of 10716 genes, 0.1%	1
biological_process	cellular polysaccharide biosynthetic process	6 out of 582 genes, 1.0%	67 out of 10716 genes, 0.6%	1
biological_process	lipid biosynthetic process	10 out of 582 genes, 1.7%	128 out of 10716 genes, 1.2%	1
biological_process	ion transport	29 out of 582 genes, 5.0%	439 out of 10716 genes, 4.1%	1
biological_process	monocarboxylic acid biosynthetic process	5 out of 582 genes, 0.9%	53 out of 10716 genes, 0.5%	1
biological_process	response to oxygen-containing compound	11 out of 582 genes, 1.9%	144 out of 10716 genes, 1.3%	1
biological_process	cellular biogenic amine metabolic process	4 out of 582 genes, 0.7%	39 out of 10716 genes, 0.4%	1
biological_process	post-embryonic morphogenesis	3 out of 582 genes, 0.5%	26 out of 10716 genes, 0.2%	1
biological_process	cellular amine metabolic process	4 out of 582 genes, 0.7%	40 out of 10716 genes, 0.4%	1
biological_process	cellular carbohydrate biosynthetic process	6 out of 582 genes, 1.0%	69 out of 10716 genes, 0.6%	1
biological_process	response to water stimulus	2 out of 582 genes, 0.3%	14 out of 10716 genes, 0.1%	1
biological_process	response to disaccharide stimulus	2 out of 582 genes, 0.3%	14 out of 10716 genes, 0.1%	1
biological_process	post-embryonic development	19 out of 582 genes, 3.3%	277 out of 10716 genes, 2.6%	1
biological_process	flavonoid biosynthetic process	5 out of 582 genes, 0.9%	55 out of 10716 genes, 0.5%	1
biological_process	developmental cell growth	3 out of 582 genes, 0.5%	27 out of 10716 genes, 0.3%	1
biological_process	root morphogenesis	4 out of 582 genes, 0.7%	41 out of 10716 genes, 0.4%	1
biological_process	plant-type cell wall modification	2 out of 582 genes, 0.3%	15 out of 10716 genes, 0.1%	1
biological_process	hormone-mediated signaling pathway	11 out of 582 genes, 1.9%	151 out of 10716 genes, 1.4%	1
biological_process	cellular response to hormone stimulus	11 out of 582 genes, 1.9%	151 out of 10716 genes, 1.4%	1
biological_process	cellular response to endogenous stimulus	11 out of 582 genes, 1.9%	151 out of 10716 genes, 1.4%	1
biological_process	polysaccharide biosynthetic process	6 out of 582 genes, 1.0%	73 out of 10716 genes, 0.7%	1
biological_process	transition metal ion transport	5 out of 582 genes, 0.9%	58 out of 10716 genes, 0.5%	1
biological_process	flavonoid metabolic process	5 out of 582 genes, 0.9%	58 out of 10716 genes, 0.5%	1
biological_process	response to oxidative stress	3 out of 582 genes, 0.5%	29 out of 10716 genes, 0.3%	1
biological_process	embryo development ending in seed dormancy	2 out of 582 genes, 0.3%	16 out of 10716 genes, 0.1%	1
biological_process	cellular glucan metabolic process	8 out of 582 genes, 1.4%	106 out of 10716 genes, 1.0%	1
biological_process	anion transport	8 out of 582 genes, 1.4%	107 out of 10716 genes, 1.0%	1
biological_process	alcohol metabolic process	5 out of 582 genes, 0.9%	60 out of 10716 genes, 0.6%	1
biological_process	organic hydroxy compound metabolic process	5 out of 582 genes, 0.9%	60 out of 10716 genes, 0.6%	1
biological_process	carbohydrate biosynthetic process	6 out of 582 genes, 1.0%	78 out of 10716 genes, 0.7%	1
biological_process	pyrimidine-containing compound metabolic process	3 out of 582 genes, 0.5%	32 out of 10716 genes, 0.3%	1
biological_process	tissue development	9 out of 582 genes, 1.5%	127 out of 10716 genes, 1.2%	1
biological_process	cellular metal ion homeostasis	2 out of 582 genes, 0.3%	18 out of 10716 genes, 0.2%	1
biological_process	carbohydrate mediated signaling	2 out of 582 genes, 0.3%	18 out of 10716 genes, 0.2%	1
biological_process	axis specification	2 out of 582 genes, 0.3%	18 out of 10716 genes, 0.2%	1
biological_process	indole-containing compound metabolic process	2 out of 582 genes, 0.3%	18 out of 10716 genes, 0.2%	1
biological_process	cellular response to carbohydrate stimulus	2 out of 582 genes, 0.3%	18 out of 10716 genes, 0.2%	1
biological_process	regulation of hormone levels	5 out of 582 genes, 0.9%	63 out of 10716 genes, 0.6%	1
biological_process	cell wall biogenesis	3 out of 582 genes, 0.5%	33 out of 10716 genes, 0.3%	1
biological_process	cellular response to chemical stimulus	13 out of 582 genes, 2.2%	196 out of 10716 genes, 1.8%	1
biological_process	transport	87 out of 582 genes, 14.9%	1503 out of 10716 genes, 14.0%	1
biological_process	regulation of molecular function	7 out of 582 genes, 1.2%	97 out of 10716 genes, 0.9%	1
biological_process	amine metabolic process	4 out of 582 genes, 0.7%	49 out of 10716 genes, 0.5%	1
biological_process	trehalose metabolic process	2 out of 582 genes, 0.3%	19 out of 10716 genes, 0.2%	1
biological_process	seed germination	2 out of 582 genes, 0.3%	19 out of 10716 genes, 0.2%	1
biological_process	seedling development	2 out of 582 genes, 0.3%	19 out of 10716 genes, 0.2%	1
biological_process	ketone biosynthetic process	5 out of 582 genes, 0.9%	65 out of 10716 genes, 0.6%	1
biological_process	response to chemical stimulus	51 out of 582 genes, 8.8%	862 out of 10716 genes, 8.0%	1
biological_process	steroid metabolic process	3 out of 582 genes, 0.5%	34 out of 10716 genes, 0.3%	1
biological_process	inorganic anion transport	4 out of 582 genes, 0.7%	50 out of 10716 genes, 0.5%	1
biological_process	cell growth	5 out of 582 genes, 0.9%	66 out of 10716 genes, 0.6%	1
biological_process	cellular response to organic substance	12 out of 582 genes, 2.1%	183 out of 10716 genes, 1.7%	1
biological_process	aromatic compound biosynthetic process	51 out of 582 genes, 8.8%	867 out of 10716 genes, 8.1%	1
biological_process	metal ion homeostasis	2 out of 582 genes, 0.3%	20 out of 10716 genes, 0.2%	1
biological_process	organic cyclic compound biosynthetic process	52 out of 582 genes, 8.9%	887 out of 10716 genes, 8.3%	1
biological_process	tropism	3 out of 582 genes, 0.5%	36 out of 10716 genes, 0.3%	1
biological_process	cell differentiation	10 out of 582 genes, 1.7%	152 out of 10716 genes, 1.4%	1
biological_process	aminoglycan catabolic process	2 out of 582 genes, 0.3%	21 out of 10716 genes, 0.2%	1
biological_process	regulation of hydrolase activity	3 out of 582 genes, 0.5%	37 out of 10716 genes, 0.3%	1
biological_process	gravitropism	2 out of 582 genes, 0.3%	22 out of 10716 genes, 0.2%	1
biological_process	response to UV	3 out of 582 genes, 0.5%	38 out of 10716 genes, 0.4%	1
biological_process	small molecule biosynthetic process	16 out of 582 genes, 2.7%	262 out of 10716 genes, 2.4%	1
biological_process	cellular polysaccharide metabolic process	8 out of 582 genes, 1.4%	123 out of 10716 genes, 1.1%	1
biological_process	localization	96 out of 582 genes, 16.5%	1702 out of 10716 genes, 15.9%	1
biological_process	response to gravity	2 out of 582 genes, 0.3%	23 out of 10716 genes, 0.2%	1
biological_process	glycerophospholipid metabolic process	3 out of 582 genes, 0.5%	40 out of 10716 genes, 0.4%	1
biological_process	phospholipid metabolic process	5 out of 582 genes, 0.9%	74 out of 10716 genes, 0.7%	1
biological_process	organ development	18 out of 582 genes, 3.1%	302 out of 10716 genes, 2.8%	1
biological_process	aminoglycan metabolic process	2 out of 582 genes, 0.3%	24 out of 10716 genes, 0.2%	1
biological_process	single-organism developmental process	25 out of 582 genes, 4.3%	431 out of 10716 genes, 4.0%	1
biological_process	cellular ketone metabolic process	5 out of 582 genes, 0.9%	76 out of 10716 genes, 0.7%	1
biological_process	meristem maintenance	2 out of 582 genes, 0.3%	25 out of 10716 genes, 0.2%	1
biological_process	cell wall modification	2 out of 582 genes, 0.3%	25 out of 10716 genes, 0.2%	1
biological_process	disaccharide metabolic process	3 out of 582 genes, 0.5%	42 out of 10716 genes, 0.4%	1
biological_process	developmental growth	3 out of 582 genes, 0.5%	42 out of 10716 genes, 0.4%	1
biological_process	single-organism transport	47 out of 582 genes, 8.1%	832 out of 10716 genes, 7.8%	1
biological_process	establishment of localization	92 out of 582 genes, 15.8%	1652 out of 10716 genes, 15.4%	1
biological_process	heterocycle biosynthetic process	47 out of 582 genes, 8.1%	833 out of 10716 genes, 7.8%	1
biological_process	cellular component morphogenesis	10 out of 582 genes, 1.7%	166 out of 10716 genes, 1.5%	1
biological_process	oligosaccharide metabolic process	3 out of 582 genes, 0.5%	43 out of 10716 genes, 0.4%	1
biological_process	glycerolipid metabolic process	3 out of 582 genes, 0.5%	43 out of 10716 genes, 0.4%	1
biological_process	one-carbon metabolic process	13 out of 582 genes, 2.2%	221 out of 10716 genes, 2.1%	1
biological_process	response to biotic stimulus	10 out of 582 genes, 1.7%	168 out of 10716 genes, 1.6%	1
biological_process	embryo development	2 out of 582 genes, 0.3%	27 out of 10716 genes, 0.3%	1
biological_process	sexual reproduction	2 out of 582 genes, 0.3%	27 out of 10716 genes, 0.3%	1
biological_process	pigment biosynthetic process	4 out of 582 genes, 0.7%	62 out of 10716 genes, 0.6%	1
biological_process	nucleobase-containing compound biosynthetic process	41 out of 582 genes, 7.0%	732 out of 10716 genes, 6.8%	1
biological_process	regulation of catalytic activity	3 out of 582 genes, 0.5%	45 out of 10716 genes, 0.4%	1
biological_process	cell morphogenesis	9 out of 582 genes, 1.5%	153 out of 10716 genes, 1.4%	1
biological_process	fruit development	2 out of 582 genes, 0.3%	28 out of 10716 genes, 0.3%	1
biological_process	seed development	2 out of 582 genes, 0.3%	28 out of 10716 genes, 0.3%	1
biological_process	flavone metabolic process	2 out of 582 genes, 0.3%	28 out of 10716 genes, 0.3%	1
biological_process	flavone biosynthetic process	2 out of 582 genes, 0.3%	28 out of 10716 genes, 0.3%	1
biological_process	carbohydrate derivative catabolic process	2 out of 582 genes, 0.3%	29 out of 10716 genes, 0.3%	1
biological_process	pigment metabolic process	4 out of 582 genes, 0.7%	65 out of 10716 genes, 0.6%	1
biological_process	organic acid biosynthetic process	10 out of 582 genes, 1.7%	174 out of 10716 genes, 1.6%	1
biological_process	carboxylic acid biosynthetic process	10 out of 582 genes, 1.7%	174 out of 10716 genes, 1.6%	1
biological_process	multi-organism reproductive process	3 out of 582 genes, 0.5%	47 out of 10716 genes, 0.4%	1
biological_process	regulation of Ras protein signal transduction	2 out of 582 genes, 0.3%	30 out of 10716 genes, 0.3%	1
biological_process	regulation of small GTPase mediated signal transduction	2 out of 582 genes, 0.3%	30 out of 10716 genes, 0.3%	1
biological_process	regulation of signal transduction	2 out of 582 genes, 0.3%	31 out of 10716 genes, 0.3%	1
biological_process	regulation of signaling	2 out of 582 genes, 0.3%	31 out of 10716 genes, 0.3%	1
biological_process	multi-organism cellular process	2 out of 582 genes, 0.3%	31 out of 10716 genes, 0.3%	1
biological_process	organonitrogen compound catabolic process	3 out of 582 genes, 0.5%	50 out of 10716 genes, 0.5%	1
biological_process	carboxylic acid metabolic process	39 out of 582 genes, 6.7%	716 out of 10716 genes, 6.7%	1
biological_process	oxoacid metabolic process	39 out of 582 genes, 6.7%	722 out of 10716 genes, 6.7%	1
biological_process	organic acid metabolic process	39 out of 582 genes, 6.7%	723 out of 10716 genes, 6.7%	1
biological_process	meristem development	3 out of 582 genes, 0.5%	53 out of 10716 genes, 0.5%	1
biological_process	aging	2 out of 582 genes, 0.3%	34 out of 10716 genes, 0.3%	1
biological_process	isoprenoid biosynthetic process	2 out of 582 genes, 0.3%	34 out of 10716 genes, 0.3%	1
biological_process	regulation of cell communication	2 out of 582 genes, 0.3%	34 out of 10716 genes, 0.3%	1
biological_process	multi-organism process	12 out of 582 genes, 2.1%	224 out of 10716 genes, 2.1%	1
biological_process	organic anion transport	3 out of 582 genes, 0.5%	54 out of 10716 genes, 0.5%	1
biological_process	water-soluble vitamin metabolic process	2 out of 582 genes, 0.3%	35 out of 10716 genes, 0.3%	1
biological_process	chemical homeostasis	5 out of 582 genes, 0.9%	93 out of 10716 genes, 0.9%	1
biological_process	cation transport	15 out of 582 genes, 2.6%	285 out of 10716 genes, 2.7%	1
biological_process	organ morphogenesis	3 out of 582 genes, 0.5%	56 out of 10716 genes, 0.5%	1
biological_process	cellular modified amino acid metabolic process	2 out of 582 genes, 0.3%	37 out of 10716 genes, 0.3%	1
biological_process	pollen development	2 out of 582 genes, 0.3%	37 out of 10716 genes, 0.3%	1
biological_process	post-embryonic root development	2 out of 582 genes, 0.3%	37 out of 10716 genes, 0.3%	1
biological_process	anatomical structure morphogenesis	16 out of 582 genes, 2.7%	309 out of 10716 genes, 2.9%	1
biological_process	regulation of response to stimulus	3 out of 582 genes, 0.5%	58 out of 10716 genes, 0.5%	1
biological_process	reactive oxygen species metabolic process	2 out of 582 genes, 0.3%	38 out of 10716 genes, 0.4%	1
biological_process	cellular component organization	40 out of 582 genes, 6.9%	764 out of 10716 genes, 7.1%	1
biological_process	system development	22 out of 582 genes, 3.8%	429 out of 10716 genes, 4.0%	1
biological_process	cellular nitrogen compound biosynthetic process	42 out of 582 genes, 7.2%	808 out of 10716 genes, 7.5%	1
biological_process	gametophyte development	7 out of 582 genes, 1.2%	140 out of 10716 genes, 1.3%	1
biological_process	pollination	2 out of 582 genes, 0.3%	40 out of 10716 genes, 0.4%	1
biological_process	peptide transport	2 out of 582 genes, 0.3%	40 out of 10716 genes, 0.4%	1
biological_process	multi-multicellular organism process	2 out of 582 genes, 0.3%	40 out of 10716 genes, 0.4%	1
biological_process	flower development	5 out of 582 genes, 0.9%	102 out of 10716 genes, 1.0%	1
biological_process	microtubule-based process	4 out of 582 genes, 0.7%	82 out of 10716 genes, 0.8%	1
biological_process	amide transport	2 out of 582 genes, 0.3%	41 out of 10716 genes, 0.4%	1
biological_process	cell development	6 out of 582 genes, 1.0%	123 out of 10716 genes, 1.1%	1
biological_process	cell communication	27 out of 582 genes, 4.6%	531 out of 10716 genes, 5.0%	1
biological_process	single-organism metabolic process	99 out of 582 genes, 17.0%	1888 out of 10716 genes, 17.6%	1
biological_process	response to temperature stimulus	2 out of 582 genes, 0.3%	42 out of 10716 genes, 0.4%	1
biological_process	cellular response to oxygen-containing compound	2 out of 582 genes, 0.3%	42 out of 10716 genes, 0.4%	1
biological_process	anatomical structure development	32 out of 582 genes, 5.5%	630 out of 10716 genes, 5.9%	1
biological_process	nucleoside triphosphate catabolic process	10 out of 582 genes, 1.7%	205 out of 10716 genes, 1.9%	1
biological_process	purine nucleoside triphosphate catabolic process	10 out of 582 genes, 1.7%	205 out of 10716 genes, 1.9%	1
biological_process	ribonucleoside triphosphate catabolic process	10 out of 582 genes, 1.7%	205 out of 10716 genes, 1.9%	1
biological_process	purine ribonucleoside triphosphate catabolic process	10 out of 582 genes, 1.7%	205 out of 10716 genes, 1.9%	1
biological_process	signal transduction	23 out of 582 genes, 4.0%	459 out of 10716 genes, 4.3%	1
biological_process	single organism signaling	23 out of 582 genes, 4.0%	459 out of 10716 genes, 4.3%	1
biological_process	organophosphate catabolic process	10 out of 582 genes, 1.7%	206 out of 10716 genes, 1.9%	1
biological_process	nucleoside phosphate catabolic process	10 out of 582 genes, 1.7%	206 out of 10716 genes, 1.9%	1
biological_process	reproductive structure development	7 out of 582 genes, 1.2%	147 out of 10716 genes, 1.4%	1
biological_process	reproductive system development	7 out of 582 genes, 1.2%	147 out of 10716 genes, 1.4%	1
biological_process	cellular cation homeostasis	2 out of 582 genes, 0.3%	44 out of 10716 genes, 0.4%	1
biological_process	single-organism carbohydrate metabolic process	14 out of 582 genes, 2.4%	287 out of 10716 genes, 2.7%	1
biological_process	terpenoid metabolic process	3 out of 582 genes, 0.5%	66 out of 10716 genes, 0.6%	1
biological_process	phyllome development	3 out of 582 genes, 0.5%	66 out of 10716 genes, 0.6%	1
biological_process	metal ion transport	8 out of 582 genes, 1.4%	169 out of 10716 genes, 1.6%	1
biological_process	organic acid transport	2 out of 582 genes, 0.3%	45 out of 10716 genes, 0.4%	1
biological_process	carboxylic acid transport	2 out of 582 genes, 0.3%	45 out of 10716 genes, 0.4%	1
biological_process	cellular process involved in reproduction	2 out of 582 genes, 0.3%	45 out of 10716 genes, 0.4%	1
biological_process	cellular macromolecule biosynthetic process	48 out of 582 genes, 8.2%	949 out of 10716 genes, 8.9%	1
biological_process	isoprenoid metabolic process	4 out of 582 genes, 0.7%	90 out of 10716 genes, 0.8%	1
biological_process	response to external stimulus	6 out of 582 genes, 1.0%	133 out of 10716 genes, 1.2%	1
biological_process	macromolecule biosynthetic process	49 out of 582 genes, 8.4%	973 out of 10716 genes, 9.1%	1
biological_process	cellular ion homeostasis	2 out of 582 genes, 0.3%	48 out of 10716 genes, 0.4%	1
biological_process	cellular chemical homeostasis	2 out of 582 genes, 0.3%	48 out of 10716 genes, 0.4%	1
biological_process	response to abiotic stimulus	30 out of 582 genes, 5.2%	612 out of 10716 genes, 5.7%	1
biological_process	pattern specification process	3 out of 582 genes, 0.5%	72 out of 10716 genes, 0.7%	1
biological_process	response to nutrient levels	3 out of 582 genes, 0.5%	72 out of 10716 genes, 0.7%	1
biological_process	nucleobase-containing compound catabolic process	10 out of 582 genes, 1.7%	219 out of 10716 genes, 2.0%	1
biological_process	vitamin metabolic process	2 out of 582 genes, 0.3%	51 out of 10716 genes, 0.5%	1
biological_process	cytoskeleton organization	2 out of 582 genes, 0.3%	51 out of 10716 genes, 0.5%	1
biological_process	glutamine family amino acid metabolic process	2 out of 582 genes, 0.3%	51 out of 10716 genes, 0.5%	1
biological_process	response to osmotic stress	9 out of 582 genes, 1.5%	203 out of 10716 genes, 1.9%	1
biological_process	growth	5 out of 582 genes, 0.9%	119 out of 10716 genes, 1.1%	1
biological_process	response to extracellular stimulus	3 out of 582 genes, 0.5%	75 out of 10716 genes, 0.7%	1
biological_process	response to light stimulus	9 out of 582 genes, 1.5%	204 out of 10716 genes, 1.9%	1
biological_process	shoot system development	3 out of 582 genes, 0.5%	76 out of 10716 genes, 0.7%	1
biological_process	response to other organism	6 out of 582 genes, 1.0%	144 out of 10716 genes, 1.3%	1
biological_process	aromatic compound catabolic process	10 out of 582 genes, 1.7%	231 out of 10716 genes, 2.2%	1
biological_process	post-embryonic organ development	2 out of 582 genes, 0.3%	56 out of 10716 genes, 0.5%	1
biological_process	regulation of biological quality	13 out of 582 genes, 2.2%	295 out of 10716 genes, 2.8%	1
biological_process	alpha-amino acid metabolic process	7 out of 582 genes, 1.2%	170 out of 10716 genes, 1.6%	1
biological_process	cell surface receptor signaling pathway	2 out of 582 genes, 0.3%	57 out of 10716 genes, 0.5%	1
biological_process	cellular response to starvation	2 out of 582 genes, 0.3%	57 out of 10716 genes, 0.5%	1
biological_process	response to starvation	2 out of 582 genes, 0.3%	57 out of 10716 genes, 0.5%	1
biological_process	small molecule metabolic process	74 out of 582 genes, 12.7%	1493 out of 10716 genes, 13.9%	1
biological_process	cellular nitrogen compound catabolic process	10 out of 582 genes, 1.7%	234 out of 10716 genes, 2.2%	1
biological_process	heterocycle catabolic process	10 out of 582 genes, 1.7%	234 out of 10716 genes, 2.2%	1
biological_process	organic cyclic compound catabolic process	10 out of 582 genes, 1.7%	235 out of 10716 genes, 2.2%	1
biological_process	cell cycle phase	2 out of 582 genes, 0.3%	58 out of 10716 genes, 0.5%	1
biological_process	hexose metabolic process	5 out of 582 genes, 0.9%	129 out of 10716 genes, 1.2%	1
biological_process	sulfur compound metabolic process	3 out of 582 genes, 0.5%	84 out of 10716 genes, 0.8%	1
biological_process	defense response	8 out of 582 genes, 1.4%	197 out of 10716 genes, 1.8%	1
biological_process	organic substance biosynthetic process	74 out of 582 genes, 12.7%	1509 out of 10716 genes, 14.1%	1
biological_process	carbohydrate catabolic process	4 out of 582 genes, 0.7%	109 out of 10716 genes, 1.0%	1
biological_process	cell morphogenesis involved in differentiation	3 out of 582 genes, 0.5%	86 out of 10716 genes, 0.8%	1
biological_process	cation homeostasis	2 out of 582 genes, 0.3%	62 out of 10716 genes, 0.6%	1
biological_process	cellular component organization or biogenesis	41 out of 582 genes, 7.0%	874 out of 10716 genes, 8.2%	1
biological_process	response to red or far red light	2 out of 582 genes, 0.3%	63 out of 10716 genes, 0.6%	1
biological_process	cellular response to nutrient levels	2 out of 582 genes, 0.3%	63 out of 10716 genes, 0.6%	1
biological_process	cellular protein complex assembly	2 out of 582 genes, 0.3%	63 out of 10716 genes, 0.6%	1
biological_process	cellular amino acid metabolic process	18 out of 582 genes, 3.1%	413 out of 10716 genes, 3.9%	1
biological_process	regionalization	2 out of 582 genes, 0.3%	64 out of 10716 genes, 0.6%	1
biological_process	glucose catabolic process	3 out of 582 genes, 0.5%	90 out of 10716 genes, 0.8%	1
biological_process	hexose catabolic process	3 out of 582 genes, 0.5%	90 out of 10716 genes, 0.8%	1
biological_process	monosaccharide catabolic process	3 out of 582 genes, 0.5%	90 out of 10716 genes, 0.8%	1
biological_process	nitrogen compound transport	5 out of 582 genes, 0.9%	138 out of 10716 genes, 1.3%	1
biological_process	cellular response to extracellular stimulus	2 out of 582 genes, 0.3%	66 out of 10716 genes, 0.6%	1
biological_process	cellular response to external stimulus	2 out of 582 genes, 0.3%	66 out of 10716 genes, 0.6%	1
biological_process	cellular macromolecular complex assembly	2 out of 582 genes, 0.3%	67 out of 10716 genes, 0.6%	1
biological_process	multicellular organismal development	32 out of 582 genes, 5.5%	712 out of 10716 genes, 6.6%	1
biological_process	biosynthetic process	76 out of 582 genes, 13.1%	1579 out of 10716 genes, 14.7%	1
biological_process	protein complex assembly	2 out of 582 genes, 0.3%	69 out of 10716 genes, 0.6%	1
biological_process	single-organism carbohydrate catabolic process	3 out of 582 genes, 0.5%	95 out of 10716 genes, 0.9%	1
biological_process	cellular amino acid biosynthetic process	4 out of 582 genes, 0.7%	120 out of 10716 genes, 1.1%	1
biological_process	protein complex biogenesis	2 out of 582 genes, 0.3%	70 out of 10716 genes, 0.7%	1
biological_process	metabolic process	405 out of 582 genes, 69.6%	7698 out of 10716 genes, 71.8%	1
biological_process	glucose metabolic process	3 out of 582 genes, 0.5%	97 out of 10716 genes, 0.9%	1
biological_process	cellular biosynthetic process	73 out of 582 genes, 12.5%	1535 out of 10716 genes, 14.3%	1
biological_process	monosaccharide metabolic process	5 out of 582 genes, 0.9%	149 out of 10716 genes, 1.4%	1
biological_process	carbohydrate derivative metabolic process	5 out of 582 genes, 0.9%	150 out of 10716 genes, 1.4%	1
biological_process	ion homeostasis	2 out of 582 genes, 0.3%	74 out of 10716 genes, 0.7%	1
biological_process	cell cycle	4 out of 582 genes, 0.7%	126 out of 10716 genes, 1.2%	1
biological_process	homeostatic process	7 out of 582 genes, 1.2%	200 out of 10716 genes, 1.9%	1
biological_process	energy derivation by oxidation of organic compounds	2 out of 582 genes, 0.3%	76 out of 10716 genes, 0.7%	1
biological_process	macromolecular complex assembly	2 out of 582 genes, 0.3%	79 out of 10716 genes, 0.7%	1
biological_process	organophosphate metabolic process	19 out of 582 genes, 3.3%	472 out of 10716 genes, 4.4%	1
biological_process	protein complex subunit organization	2 out of 582 genes, 0.3%	81 out of 10716 genes, 0.8%	1
biological_process	purine nucleoside triphosphate metabolic process	10 out of 582 genes, 1.7%	278 out of 10716 genes, 2.6%	1
biological_process	ribonucleoside triphosphate metabolic process	10 out of 582 genes, 1.7%	278 out of 10716 genes, 2.6%	1
biological_process	purine ribonucleoside triphosphate metabolic process	10 out of 582 genes, 1.7%	278 out of 10716 genes, 2.6%	1
biological_process	nucleoside triphosphate metabolic process	10 out of 582 genes, 1.7%	281 out of 10716 genes, 2.6%	1
biological_process	RNA metabolic process	41 out of 582 genes, 7.0%	938 out of 10716 genes, 8.8%	1
biological_process	primary metabolic process	253 out of 582 genes, 43.5%	4996 out of 10716 genes, 46.6%	1
biological_process	single-multicellular organism process	32 out of 582 genes, 5.5%	758 out of 10716 genes, 7.1%	1
biological_process	ion transmembrane transport	2 out of 582 genes, 0.3%	86 out of 10716 genes, 0.8%	1
biological_process	signaling	23 out of 582 genes, 4.0%	579 out of 10716 genes, 5.4%	1
biological_process	multicellular organismal process	35 out of 582 genes, 6.0%	832 out of 10716 genes, 7.8%	1
biological_process	protein modification by small protein conjugation	3 out of 582 genes, 0.5%	119 out of 10716 genes, 1.1%	1
biological_process	purine nucleoside triphosphate biosynthetic process	2 out of 582 genes, 0.3%	91 out of 10716 genes, 0.8%	1
biological_process	ribonucleoside triphosphate biosynthetic process	2 out of 582 genes, 0.3%	91 out of 10716 genes, 0.8%	1
biological_process	purine ribonucleoside triphosphate biosynthetic process	2 out of 582 genes, 0.3%	91 out of 10716 genes, 0.8%	1
biological_process	nucleoside triphosphate biosynthetic process	2 out of 582 genes, 0.3%	92 out of 10716 genes, 0.9%	1
biological_process	single-organism process	143 out of 582 genes, 24.6%	2972 out of 10716 genes, 27.7%	1
biological_process	cellular homeostasis	4 out of 582 genes, 0.7%	150 out of 10716 genes, 1.4%	1
biological_process	regulation of cellular process	29 out of 582 genes, 5.0%	717 out of 10716 genes, 6.7%	1
biological_process	transmembrane transport	2 out of 582 genes, 0.3%	96 out of 10716 genes, 0.9%	1
biological_process	cell cycle process	2 out of 582 genes, 0.3%	97 out of 10716 genes, 0.9%	1
biological_process	oxidation-reduction process	3 out of 582 genes, 0.5%	127 out of 10716 genes, 1.2%	1
biological_process	cellular response to stimulus	27 out of 582 genes, 4.6%	686 out of 10716 genes, 6.4%	1
biological_process	cellular component assembly	2 out of 582 genes, 0.3%	99 out of 10716 genes, 0.9%	1
biological_process	response to radiation	9 out of 582 genes, 1.5%	284 out of 10716 genes, 2.7%	1
biological_process	macromolecular complex subunit organization	3 out of 582 genes, 0.5%	133 out of 10716 genes, 1.2%	1
biological_process	intracellular signal transduction	2 out of 582 genes, 0.3%	104 out of 10716 genes, 1.0%	1
biological_process	regulation of transcription, DNA-dependent	2 out of 582 genes, 0.3%	107 out of 10716 genes, 1.0%	1
biological_process	regulation of RNA metabolic process	2 out of 582 genes, 0.3%	107 out of 10716 genes, 1.0%	1
biological_process	regulation of RNA biosynthetic process	2 out of 582 genes, 0.3%	107 out of 10716 genes, 1.0%	1
biological_process	protein modification by small protein conjugation or removal	3 out of 582 genes, 0.5%	138 out of 10716 genes, 1.3%	1
biological_process	reproduction	23 out of 582 genes, 4.0%	619 out of 10716 genes, 5.8%	1
biological_process	regulation of nucleobase-containing compound metabolic process	3 out of 582 genes, 0.5%	141 out of 10716 genes, 1.3%	1
biological_process	regulation of nitrogen compound metabolic process	3 out of 582 genes, 0.5%	142 out of 10716 genes, 1.3%	1
biological_process	cellular aromatic compound metabolic process	88 out of 582 genes, 15.1%	1974 out of 10716 genes, 18.4%	1
biological_process	regulation of macromolecule biosynthetic process	2 out of 582 genes, 0.3%	115 out of 10716 genes, 1.1%	1
biological_process	regulation of cellular macromolecule biosynthetic process	2 out of 582 genes, 0.3%	115 out of 10716 genes, 1.1%	1
biological_process	biological regulation	49 out of 582 genes, 8.4%	1192 out of 10716 genes, 11.1%	1
biological_process	regulation of biological process	35 out of 582 genes, 6.0%	897 out of 10716 genes, 8.4%	1
biological_process	nucleobase-containing small molecule metabolic process	13 out of 582 genes, 2.2%	407 out of 10716 genes, 3.8%	1
biological_process	regulation of cellular biosynthetic process	2 out of 582 genes, 0.3%	117 out of 10716 genes, 1.1%	1
biological_process	organonitrogen compound metabolic process	26 out of 582 genes, 4.5%	706 out of 10716 genes, 6.6%	1
biological_process	regulation of biosynthetic process	2 out of 582 genes, 0.3%	118 out of 10716 genes, 1.1%	1
biological_process	nucleoside phosphate metabolic process	12 out of 582 genes, 2.1%	386 out of 10716 genes, 3.6%	1
biological_process	developmental process	46 out of 582 genes, 7.9%	1142 out of 10716 genes, 10.7%	1
biological_process	reproductive process	20 out of 582 genes, 3.4%	578 out of 10716 genes, 5.4%	1
biological_process	response to inorganic substance	8 out of 582 genes, 1.4%	299 out of 10716 genes, 2.8%	1
biological_process	regulation of primary metabolic process	3 out of 582 genes, 0.5%	160 out of 10716 genes, 1.5%	1
biological_process	single-organism cellular process	91 out of 582 genes, 15.6%	2082 out of 10716 genes, 19.4%	1
biological_process	nucleotide metabolic process	2 out of 582 genes, 0.3%	128 out of 10716 genes, 1.2%	1
biological_process	cellular component biogenesis	5 out of 582 genes, 0.9%	224 out of 10716 genes, 2.1%	1
biological_process	organic cyclic compound metabolic process	87 out of 582 genes, 14.9%	2019 out of 10716 genes, 18.8%	1
biological_process	nucleoside phosphate biosynthetic process	2 out of 582 genes, 0.3%	137 out of 10716 genes, 1.3%	1
biological_process	phosphate-containing compound metabolic process	26 out of 582 genes, 4.5%	747 out of 10716 genes, 7.0%	1
biological_process	developmental process involved in reproduction	16 out of 582 genes, 2.7%	516 out of 10716 genes, 4.8%	1
biological_process	tRNA metabolic process	2 out of 582 genes, 0.3%	139 out of 10716 genes, 1.3%	1
biological_process	organic substance transport	13 out of 582 genes, 2.2%	445 out of 10716 genes, 4.2%	1
biological_process	macromolecule catabolic process	5 out of 582 genes, 0.9%	236 out of 10716 genes, 2.2%	1
biological_process	organic substance catabolic process	19 out of 582 genes, 3.3%	596 out of 10716 genes, 5.6%	1
biological_process	regulation of cellular metabolic process	3 out of 582 genes, 0.5%	179 out of 10716 genes, 1.7%	1
biological_process	phosphorus metabolic process	26 out of 582 genes, 4.5%	767 out of 10716 genes, 7.2%	1
biological_process	cellular catabolic process	13 out of 582 genes, 2.2%	465 out of 10716 genes, 4.3%	1
biological_process	organophosphate biosynthetic process	2 out of 582 genes, 0.3%	153 out of 10716 genes, 1.4%	1
biological_process	nucleic acid metabolic process	48 out of 582 genes, 8.2%	1264 out of 10716 genes, 11.8%	1
biological_process	response to metal ion	5 out of 582 genes, 0.9%	255 out of 10716 genes, 2.4%	1
biological_process	modification-dependent protein catabolic process	2 out of 582 genes, 0.3%	160 out of 10716 genes, 1.5%	1
biological_process	modification-dependent macromolecule catabolic process	2 out of 582 genes, 0.3%	160 out of 10716 genes, 1.5%	1
biological_process	catabolic process	19 out of 582 genes, 3.3%	625 out of 10716 genes, 5.8%	1
biological_process	ncRNA metabolic process	2 out of 582 genes, 0.3%	161 out of 10716 genes, 1.5%	1
biological_process	proteolysis involved in cellular protein catabolic process	2 out of 582 genes, 0.3%	163 out of 10716 genes, 1.5%	1
biological_process	cellular response to stress	3 out of 582 genes, 0.5%	202 out of 10716 genes, 1.9%	1
biological_process	proteolysis	2 out of 582 genes, 0.3%	168 out of 10716 genes, 1.6%	1
biological_process	protein catabolic process	2 out of 582 genes, 0.3%	168 out of 10716 genes, 1.6%	1
biological_process	cellular protein catabolic process	2 out of 582 genes, 0.3%	168 out of 10716 genes, 1.6%	1
biological_process	macromolecule localization	6 out of 582 genes, 1.0%	303 out of 10716 genes, 2.8%	1
biological_process	organonitrogen compound biosynthetic process	5 out of 582 genes, 0.9%	274 out of 10716 genes, 2.6%	1
biological_process	cellular macromolecule catabolic process	2 out of 582 genes, 0.3%	181 out of 10716 genes, 1.7%	1
biological_process	DNA metabolic process	7 out of 582 genes, 1.2%	353 out of 10716 genes, 3.3%	1
biological_process	regulation of gene expression	2 out of 582 genes, 0.3%	194 out of 10716 genes, 1.8%	1
biological_process	heterocycle metabolic process	72 out of 582 genes, 12.4%	1873 out of 10716 genes, 17.5%	1
biological_process	regulation of metabolic process	5 out of 582 genes, 0.9%	302 out of 10716 genes, 2.8%	1
biological_process	nitrogen compound metabolic process	87 out of 582 genes, 14.9%	2202 out of 10716 genes, 20.5%	1
biological_process	nucleobase-containing compound metabolic process	62 out of 582 genes, 10.7%	1676 out of 10716 genes, 15.6%	1
biological_process	generation of precursor metabolites and energy	2 out of 582 genes, 0.3%	202 out of 10716 genes, 1.9%	1
biological_process	regulation of macromolecule metabolic process	2 out of 582 genes, 0.3%	208 out of 10716 genes, 1.9%	1
biological_process	cellular nitrogen compound metabolic process	69 out of 582 genes, 11.9%	1846 out of 10716 genes, 17.2%	1
biological_process	translation	2 out of 582 genes, 0.3%	239 out of 10716 genes, 2.2%	1
biological_process	organelle organization	5 out of 582 genes, 0.9%	378 out of 10716 genes, 3.5%	1
biological_process	gene expression	46 out of 582 genes, 7.9%	1460 out of 10716 genes, 13.6%	1
biological_process	cellular protein modification process	20 out of 582 genes, 3.4%	1057 out of 10716 genes, 9.9%	1
biological_process	protein modification process	20 out of 582 genes, 3.4%	1057 out of 10716 genes, 9.9%	1
biological_process	cellular protein metabolic process	23 out of 582 genes, 4.0%	1622 out of 10716 genes, 15.1%	1
biological_process	organic substance metabolic process	222 out of 582 genes, 38.1%	5442 out of 10716 genes, 50.8%	1
biological_process	macromolecule modification	20 out of 582 genes, 3.4%	1168 out of 10716 genes, 10.9%	1
biological_process	protein metabolic process	44 out of 582 genes, 7.6%	1967 out of 10716 genes, 18.4%	1
biological_process	cellular macromolecule metabolic process	79 out of 582 genes, 13.6%	2856 out of 10716 genes, 26.7%	1
biological_process	cellular process	259 out of 582 genes, 44.5%	6445 out of 10716 genes, 60.1%	1
biological_process	macromolecule metabolic process	126 out of 582 genes, 21.6%	3777 out of 10716 genes, 35.2%	1
biological_process	cellular metabolic process	187 out of 582 genes, 32.1%	4986 out of 10716 genes, 46.5%	1

## Sheet: 2Avs4A
cellular_component	Gene Ontology term	Cluster frequency	Genome frequency of use	Corrected P-value
cellular_component	xternal encapsulating structure	107 out of 1477 genes, 7.2%	327 out of 9574 genes, 3.4%	1.86e-13
cellular_component	cell periphery	115 out of 1477 genes, 7.8%	385 out of 9574 genes, 4.0%	2.18e-11
cellular_component	cell wall	46 out of 1477 genes, 3.1%	139 out of 9574 genes, 1.5%	1.65e-05
cellular_component	extracellular region	63 out of 1477 genes, 4.3%	250 out of 9574 genes, 2.6%	0.00383
cellular_component	intrinsic to membrane	222 out of 1477 genes, 15.0%	1133 out of 9574 genes, 11.8%	0.00389
cellular_component	anchored to membrane	12 out of 1477 genes, 0.8%	33 out of 9574 genes, 0.3%	0.3009
cellular_component	membrane	470 out of 1477 genes, 31.8%	2752 out of 9574 genes, 28.7%	0.30303
cellular_component	membrane part	250 out of 1477 genes, 16.9%	1391 out of 9574 genes, 14.5%	0.33115
cellular_component	microtubule cytoskeleton	29 out of 1477 genes, 2.0%	118 out of 9574 genes, 1.2%	0.70491
cellular_component	plant-type vacuole	13 out of 1477 genes, 0.9%	44 out of 9574 genes, 0.5%	1
cellular_component	extracellular matrix	4 out of 1477 genes, 0.3%	7 out of 9574 genes, 0.1%	1
cellular_component	cytoskeleton	38 out of 1477 genes, 2.6%	174 out of 9574 genes, 1.8%	1
cellular_component	vesicle	84 out of 1477 genes, 5.7%	438 out of 9574 genes, 4.6%	1
cellular_component	cytoplasmic vesicle	83 out of 1477 genes, 5.6%	433 out of 9574 genes, 4.5%	1
cellular_component	photosystem	15 out of 1477 genes, 1.0%	56 out of 9574 genes, 0.6%	1
cellular_component	chromatin	13 out of 1477 genes, 0.9%	48 out of 9574 genes, 0.5%	1
cellular_component	photosynthetic membrane	18 out of 1477 genes, 1.2%	74 out of 9574 genes, 0.8%	1
cellular_component	thylakoid part	23 out of 1477 genes, 1.6%	102 out of 9574 genes, 1.1%	1
cellular_component	nucleotide-excision repair complex	2 out of 1477 genes, 0.1%	3 out of 9574 genes, 0.0%	1
cellular_component	cytoplasmic microtubule	3 out of 1477 genes, 0.2%	7 out of 9574 genes, 0.1%	1
cellular_component	photosystem I	3 out of 1477 genes, 0.2%	7 out of 9574 genes, 0.1%	1
cellular_component	vacuole	15 out of 1477 genes, 1.0%	74 out of 9574 genes, 0.8%	1
cellular_component	photosystem II	6 out of 1477 genes, 0.4%	25 out of 9574 genes, 0.3%	1
cellular_component	microtubule	3 out of 1477 genes, 0.2%	10 out of 9574 genes, 0.1%	1
cellular_component	endoplasmic reticulum part	10 out of 1477 genes, 0.7%	48 out of 9574 genes, 0.5%	1
cellular_component	cytoskeletal part	5 out of 1477 genes, 0.3%	21 out of 9574 genes, 0.2%	1
cellular_component	endosome membrane	4 out of 1477 genes, 0.3%	16 out of 9574 genes, 0.2%	1
cellular_component	endosomal part	4 out of 1477 genes, 0.3%	16 out of 9574 genes, 0.2%	1
cellular_component	cell-cell junction	2 out of 1477 genes, 0.1%	6 out of 9574 genes, 0.1%	1
cellular_component	endoplasmic reticulum	10 out of 1477 genes, 0.7%	50 out of 9574 genes, 0.5%	1
cellular_component	cell projection	4 out of 1477 genes, 0.3%	17 out of 9574 genes, 0.2%	1
cellular_component	extracellular region part	4 out of 1477 genes, 0.3%	19 out of 9574 genes, 0.2%	1
cellular_component	cell junction	2 out of 1477 genes, 0.1%	8 out of 9574 genes, 0.1%	1
cellular_component	non-membrane-bounded organelle	72 out of 1477 genes, 4.9%	449 out of 9574 genes, 4.7%	1
cellular_component	intracellular non-membrane-bounded organelle	72 out of 1477 genes, 4.9%	449 out of 9574 genes, 4.7%	1
cellular_component	thylakoid	52 out of 1477 genes, 3.5%	323 out of 9574 genes, 3.4%	1
cellular_component	organellar ribosome	2 out of 1477 genes, 0.1%	9 out of 9574 genes, 0.1%	1
cellular_component	chromosomal part	16 out of 1477 genes, 1.1%	98 out of 9574 genes, 1.0%	1
cellular_component	endosome	5 out of 1477 genes, 0.3%	29 out of 9574 genes, 0.3%	1
cellular_component	plastid inner membrane	6 out of 1477 genes, 0.4%	37 out of 9574 genes, 0.4%	1
cellular_component	plasma membrane	9 out of 1477 genes, 0.6%	57 out of 9574 genes, 0.6%	1
cellular_component	actin cytoskeleton	6 out of 1477 genes, 0.4%	39 out of 9574 genes, 0.4%	1
cellular_component	proton-transporting V-type ATPase complex	3 out of 1477 genes, 0.2%	21 out of 9574 genes, 0.2%	1
cellular_component	plasma membrane part	8 out of 1477 genes, 0.5%	56 out of 9574 genes, 0.6%	1
cellular_component	chloroplast stroma	4 out of 1477 genes, 0.3%	29 out of 9574 genes, 0.3%	1
cellular_component	endoplasmic reticulum membrane	4 out of 1477 genes, 0.3%	31 out of 9574 genes, 0.3%	1
cellular_component	nuclear outer membrane-endoplasmic reticulum membrane network	4 out of 1477 genes, 0.3%	31 out of 9574 genes, 0.3%	1
cellular_component	nuclear chromosome	2 out of 1477 genes, 0.1%	16 out of 9574 genes, 0.2%	1
cellular_component	chromosome	19 out of 1477 genes, 1.3%	138 out of 9574 genes, 1.4%	1
cellular_component	microbody	19 out of 1477 genes, 1.3%	139 out of 9574 genes, 1.5%	1
cellular_component	chloroplast thylakoid	37 out of 1477 genes, 2.5%	266 out of 9574 genes, 2.8%	1
cellular_component	transport vesicle	2 out of 1477 genes, 0.1%	18 out of 9574 genes, 0.2%	1
cellular_component	microbody part	2 out of 1477 genes, 0.1%	18 out of 9574 genes, 0.2%	1
cellular_component	peroxisomal part	2 out of 1477 genes, 0.1%	18 out of 9574 genes, 0.2%	1
cellular_component	plastid membrane	7 out of 1477 genes, 0.5%	59 out of 9574 genes, 0.6%	1
cellular_component	chloroplast	44 out of 1477 genes, 3.0%	321 out of 9574 genes, 3.4%	1
cellular_component	intrinsic to organelle membrane	2 out of 1477 genes, 0.1%	20 out of 9574 genes, 0.2%	1
cellular_component	plastid thylakoid	38 out of 1477 genes, 2.6%	284 out of 9574 genes, 3.0%	1
cellular_component	organelle subcompartment	38 out of 1477 genes, 2.6%	284 out of 9574 genes, 3.0%	1
cellular_component	proteasome regulatory particle	2 out of 1477 genes, 0.1%	21 out of 9574 genes, 0.2%	1
cellular_component	proteasome accessory complex	2 out of 1477 genes, 0.1%	21 out of 9574 genes, 0.2%	1
cellular_component	ribosome	11 out of 1477 genes, 0.7%	92 out of 9574 genes, 1.0%	1
cellular_component	internal side of plasma membrane	3 out of 1477 genes, 0.2%	33 out of 9574 genes, 0.3%	1
cellular_component	extrinsic to plasma membrane	3 out of 1477 genes, 0.2%	33 out of 9574 genes, 0.3%	1
cellular_component	extrinsic to internal side of plasma membrane	3 out of 1477 genes, 0.2%	33 out of 9574 genes, 0.3%	1
cellular_component	large ribosomal subunit	3 out of 1477 genes, 0.2%	34 out of 9574 genes, 0.4%	1
cellular_component	extrinsic to membrane	3 out of 1477 genes, 0.2%	34 out of 9574 genes, 0.4%	1
cellular_component	chloroplast part	39 out of 1477 genes, 2.6%	308 out of 9574 genes, 3.2%	1
cellular_component	peroxisome	2 out of 1477 genes, 0.1%	27 out of 9574 genes, 0.3%	1
cellular_component	integral to membrane	4 out of 1477 genes, 0.3%	49 out of 9574 genes, 0.5%	1
cellular_component	nuclear envelope	3 out of 1477 genes, 0.2%	41 out of 9574 genes, 0.4%	1
cellular_component	proton-transporting two-sector ATPase complex	5 out of 1477 genes, 0.3%	61 out of 9574 genes, 0.6%	1
cellular_component	membrane coat	2 out of 1477 genes, 0.1%	34 out of 9574 genes, 0.4%	1
cellular_component	coated membrane	2 out of 1477 genes, 0.1%	34 out of 9574 genes, 0.4%	1
cellular_component	membrane-bounded vesicle	3 out of 1477 genes, 0.2%	45 out of 9574 genes, 0.5%	1
cellular_component	ribosomal subunit	4 out of 1477 genes, 0.3%	55 out of 9574 genes, 0.6%	1
cellular_component	proteasome complex	3 out of 1477 genes, 0.2%	51 out of 9574 genes, 0.5%	1
cellular_component	cytoplasmic membrane-bounded vesicle	2 out of 1477 genes, 0.1%	40 out of 9574 genes, 0.4%	1
cellular_component	nuclear lumen	22 out of 1477 genes, 1.5%	233 out of 9574 genes, 2.4%	1
cellular_component	organelle lumen	22 out of 1477 genes, 1.5%	233 out of 9574 genes, 2.4%	1
cellular_component	intracellular organelle lumen	22 out of 1477 genes, 1.5%	233 out of 9574 genes, 2.4%	1
cellular_component	membrane-enclosed lumen	22 out of 1477 genes, 1.5%	239 out of 9574 genes, 2.5%	1
cellular_component	nuclear part	26 out of 1477 genes, 1.8%	279 out of 9574 genes, 2.9%	1
cellular_component	nucleus	28 out of 1477 genes, 1.9%	296 out of 9574 genes, 3.1%	1
cellular_component	endomembrane system	12 out of 1477 genes, 0.8%	160 out of 9574 genes, 1.7%	1
cellular_component	plastid envelope	35 out of 1477 genes, 2.4%	355 out of 9574 genes, 3.7%	1
cellular_component	nucleoplasm	2 out of 1477 genes, 0.1%	59 out of 9574 genes, 0.6%	1
cellular_component	nucleoplasm part	2 out of 1477 genes, 0.1%	59 out of 9574 genes, 0.6%	1
cellular_component	plastid stroma	36 out of 1477 genes, 2.4%	366 out of 9574 genes, 3.8%	1
cellular_component	organelle membrane	64 out of 1477 genes, 4.3%	608 out of 9574 genes, 6.4%	1
cellular_component	ubiquitin ligase complex	5 out of 1477 genes, 0.3%	112 out of 9574 genes, 1.2%	1
cellular_component	cullin-RING ubiquitin ligase complex	4 out of 1477 genes, 0.3%	102 out of 9574 genes, 1.1%	1
cellular_component	organelle inner membrane	11 out of 1477 genes, 0.7%	186 out of 9574 genes, 1.9%	1
cellular_component	mitochondrial part	5 out of 1477 genes, 0.3%	124 out of 9574 genes, 1.3%	1
cellular_component	mitochondrial envelope	2 out of 1477 genes, 0.1%	88 out of 9574 genes, 0.9%	1
cellular_component	protein complex	77 out of 1477 genes, 5.2%	753 out of 9574 genes, 7.9%	1
cellular_component	plastid part	81 out of 1477 genes, 5.5%	787 out of 9574 genes, 8.2%	1
cellular_component	mitochondrion	5 out of 1477 genes, 0.3%	130 out of 9574 genes, 1.4%	1
cellular_component	ribonucleoprotein complex	32 out of 1477 genes, 2.2%	403 out of 9574 genes, 4.2%	1
cellular_component	organelle envelope	44 out of 1477 genes, 3.0%	563 out of 9574 genes, 5.9%	1
cellular_component	envelope	44 out of 1477 genes, 3.0%	571 out of 9574 genes, 6.0%	1
cellular_component	cytoplasmic part	370 out of 1477 genes, 25.1%	3016 out of 9574 genes, 31.5%	1
cellular_component	cytoplasm	371 out of 1477 genes, 25.1%	3024 out of 9574 genes, 31.6%	1
cellular_component	cell	1136 out of 1477 genes, 76.9%	7912 out of 9574 genes, 82.6%	1
cellular_component	cell part	1136 out of 1477 genes, 76.9%	7912 out of 9574 genes, 82.6%	1
cellular_component	plastid	200 out of 1477 genes, 13.5%	1831 out of 9574 genes, 19.1%	1
cellular_component	intracellular	854 out of 1477 genes, 57.8%	6756 out of 9574 genes, 70.6%	1
cellular_component	macromolecular complex	114 out of 1477 genes, 7.7%	1215 out of 9574 genes, 12.7%	1
cellular_component	organelle	759 out of 1477 genes, 51.4%	5962 out of 9574 genes, 62.3%	1
cellular_component	membrane-bounded organelle	647 out of 1477 genes, 43.8%	5407 out of 9574 genes, 56.5%	1
cellular_component	intracellular organelle	742 out of 1477 genes, 50.2%	5874 out of 9574 genes, 61.4%	1
cellular_component	intracellular membrane-bounded organelle	628 out of 1477 genes, 42.5%	5273 out of 9574 genes, 55.1%	1
cellular_component	organelle part	182 out of 1477 genes, 12.3%	1789 out of 9574 genes, 18.7%	1
cellular_component	intracellular part	853 out of 1477 genes, 57.8%	6730 out of 9574 genes, 70.3%	1
cellular_component	intracellular organelle part	147 out of 1477 genes, 10.0%	1552 out of 9574 genes, 16.2%	1
molecular_function	Catalytic activity	1734 out of 2381 genes, 72.8%	8776 out of 12888 genes, 68.1%	5.4e-06
molecular_function	hydrolase activity, acting on glycosyl bonds	131 out of 2381 genes, 5.5%	452 out of 12888 genes, 3.5%	6.59e-06
molecular_function	transferase activity, transferring glycosyl groups	129 out of 2381 genes, 5.4%	476 out of 12888 genes, 3.7%	0.0005
molecular_function	iron ion binding	108 out of 2381 genes, 4.5%	388 out of 12888 genes, 3.0%	0.00095
molecular_function	oxidoreductase activity	386 out of 2381 genes, 16.2%	1713 out of 12888 genes, 13.3%	0.00099
molecular_function	hydrolase activity, hydrolyzing O-glycosyl compounds	90 out of 2381 genes, 3.8%	320 out of 12888 genes, 2.5%	0.00405
molecular_function	transferase activity, transferring hexosyl groups	83 out of 2381 genes, 3.5%	290 out of 12888 genes, 2.3%	0.00432
molecular_function	transferase activity	641 out of 2381 genes, 26.9%	3047 out of 12888 genes, 23.6%	0.00665
molecular_function	oxidoreductase activity, acting on diphenols and related substances as donors	31 out of 2381 genes, 1.3%	83 out of 12888 genes, 0.6%	0.01256
molecular_function	antioxidant activity	44 out of 2381 genes, 1.8%	135 out of 12888 genes, 1.0%	0.018
molecular_function	oxidoreductase activity, acting on single donors with incorporation of molecular oxygen	33 out of 2381 genes, 1.4%	94 out of 12888 genes, 0.7%	0.03001
molecular_function	kinase activity	272 out of 2381 genes, 11.4%	1207 out of 12888 genes, 9.4%	0.03478
molecular_function	phosphoric diester hydrolase activity	11 out of 2381 genes, 0.5%	20 out of 12888 genes, 0.2%	0.08699
molecular_function	dioxygenase activity	36 out of 2381 genes, 1.5%	111 out of 12888 genes, 0.9%	0.09164
molecular_function	protein kinase activity	208 out of 2381 genes, 8.7%	908 out of 12888 genes, 7.0%	0.09242
molecular_function	glucosidase activity	26 out of 2381 genes, 1.1%	72 out of 12888 genes, 0.6%	0.09654
molecular_function	oxidoreductase activity, acting on diphenols and related substances as donors, oxygen as acceptor	27 out of 2381 genes, 1.1%	76 out of 12888 genes, 0.6%	0.10117
molecular_function	phospholipase C activity	8 out of 2381 genes, 0.3%	12 out of 12888 genes, 0.1%	0.10505
molecular_function	oxidoreductase activity, acting on paired donors, with incorporation or reduction of molecular oxygen	65 out of 2381 genes, 2.7%	236 out of 12888 genes, 1.8%	0.1178
molecular_function	carboxypeptidase activity	20 out of 2381 genes, 0.8%	51 out of 12888 genes, 0.4%	0.13689
molecular_function	monooxygenase activity	59 out of 2381 genes, 2.5%	212 out of 12888 genes, 1.6%	0.16129
molecular_function	phosphotransferase activity, alcohol group as acceptor	217 out of 2381 genes, 9.1%	962 out of 12888 genes, 7.5%	0.16864
molecular_function	motor activity	26 out of 2381 genes, 1.1%	76 out of 12888 genes, 0.6%	0.2512
molecular_function	secondary active transmembrane transporter activity	40 out of 2381 genes, 1.7%	134 out of 12888 genes, 1.0%	0.2892
molecular_function	peptidase regulator activity	9 out of 2381 genes, 0.4%	18 out of 12888 genes, 0.1%	0.77011
molecular_function	endopeptidase regulator activity	9 out of 2381 genes, 0.4%	18 out of 12888 genes, 0.1%	0.77011
molecular_function	oxidoreductase activity, acting on paired donors, with incorporation or reduction of molecular oxygen, 2-oxoglutarate as one donor, and incorporation of one atom each of oxygen into both donors	26 out of 2381 genes, 1.1%	82 out of 12888 genes, 0.6%	0.86799
molecular_function	beta-glucosidase activity	11 out of 2381 genes, 0.5%	25 out of 12888 genes, 0.2%	0.93257
molecular_function	transition metal ion transmembrane transporter activity	11 out of 2381 genes, 0.5%	25 out of 12888 genes, 0.2%	0.93257
molecular_function	galactosyltransferase activity	13 out of 2381 genes, 0.5%	33 out of 12888 genes, 0.3%	1
molecular_function	endopeptidase inhibitor activity	6 out of 2381 genes, 0.3%	10 out of 12888 genes, 0.1%	1
molecular_function	peptidase inhibitor activity	6 out of 2381 genes, 0.3%	10 out of 12888 genes, 0.1%	1
molecular_function	oxidoreductase activity, acting on NAD(P)H, oxygen as acceptor	6 out of 2381 genes, 0.3%	11 out of 12888 genes, 0.1%	1
molecular_function	carbon-nitrogen lyase activity	11 out of 2381 genes, 0.5%	28 out of 12888 genes, 0.2%	1
molecular_function	amine transmembrane transporter activity	12 out of 2381 genes, 0.5%	32 out of 12888 genes, 0.2%	1
molecular_function	enzyme inhibitor activity	7 out of 2381 genes, 0.3%	15 out of 12888 genes, 0.1%	1
molecular_function	carbon-oxygen lyase activity, acting on polysaccharides	7 out of 2381 genes, 0.3%	15 out of 12888 genes, 0.1%	1
molecular_function	oxidoreductase activity, acting on the CH-CH group of donors, NAD or NADP as acceptor	58 out of 2381 genes, 2.4%	240 out of 12888 genes, 1.9%	1
molecular_function	phospholipase activity	14 out of 2381 genes, 0.6%	43 out of 12888 genes, 0.3%	1
molecular_function	carbohydrate binding	25 out of 2381 genes, 1.0%	92 out of 12888 genes, 0.7%	1
molecular_function	cellulose synthase activity	12 out of 2381 genes, 0.5%	37 out of 12888 genes, 0.3%	1
molecular_function	oxidoreductase activity, acting on single donors with incorporation of molecular oxygen, incorporation of two atoms of oxygen	10 out of 2381 genes, 0.4%	29 out of 12888 genes, 0.2%	1
molecular_function	enzyme regulator activity	35 out of 2381 genes, 1.5%	140 out of 12888 genes, 1.1%	1
molecular_function	microtubule motor activity	2 out of 2381 genes, 0.1%	2 out of 12888 genes, 0.0%	1
molecular_function	zinc ion transmembrane transporter activity	2 out of 2381 genes, 0.1%	2 out of 12888 genes, 0.0%	1
molecular_function	histone kinase activity	2 out of 2381 genes, 0.1%	2 out of 12888 genes, 0.0%	1
molecular_function	histone serine kinase activity	2 out of 2381 genes, 0.1%	2 out of 12888 genes, 0.0%	1
molecular_function	carboxylic ester hydrolase activity	35 out of 2381 genes, 1.5%	141 out of 12888 genes, 1.1%	1
molecular_function	glucosyltransferase activity	31 out of 2381 genes, 1.3%	124 out of 12888 genes, 1.0%	1
molecular_function	UDP-glycosyltransferase activity	42 out of 2381 genes, 1.8%	176 out of 12888 genes, 1.4%	1
molecular_function	phosphoenolpyruvate carboxykinase activity	4 out of 2381 genes, 0.2%	8 out of 12888 genes, 0.1%	1
molecular_function	alkali metal ion binding	6 out of 2381 genes, 0.3%	15 out of 12888 genes, 0.1%	1
molecular_function	oxidoreductase activity, acting on the CH-CH group of donors	65 out of 2381 genes, 2.7%	288 out of 12888 genes, 2.2%	1
molecular_function	ion binding	519 out of 2381 genes, 21.8%	2643 out of 12888 genes, 20.5%	1
molecular_function	carboxylesterase activity	34 out of 2381 genes, 1.4%	139 out of 12888 genes, 1.1%	1
molecular_function	peroxidase activity	7 out of 2381 genes, 0.3%	19 out of 12888 genes, 0.1%	1
molecular_function	oxidoreductase activity, acting on peroxide as acceptor	7 out of 2381 genes, 0.3%	19 out of 12888 genes, 0.1%	1
molecular_function	lipase activity	14 out of 2381 genes, 0.6%	48 out of 12888 genes, 0.4%	1
molecular_function	alpha-glucosidase activity	5 out of 2381 genes, 0.2%	12 out of 12888 genes, 0.1%	1
molecular_function	oxidoreductase activity, acting on the CH-OH group of donors, oxygen as acceptor	5 out of 2381 genes, 0.2%	12 out of 12888 genes, 0.1%	1
molecular_function	organic phosphonate transmembrane transporter activity	10 out of 2381 genes, 0.4%	32 out of 12888 genes, 0.2%	1
molecular_function	active transmembrane transporter activity	74 out of 2381 genes, 3.1%	338 out of 12888 genes, 2.6%	1
molecular_function	water transmembrane transporter activity	4 out of 2381 genes, 0.2%	9 out of 12888 genes, 0.1%	1
molecular_function	transferase activity, transferring phosphorus-containing groups	304 out of 2381 genes, 12.8%	1527 out of 12888 genes, 11.8%	1
molecular_function	macrolide binding	5 out of 2381 genes, 0.2%	13 out of 12888 genes, 0.1%	1
molecular_function	oxidoreductase activity, acting on paired donors, with incorporation or reduction of molecular oxygen, reduced flavin or flavoprotein as one donor, and incorporation of one atom of oxygen	6 out of 2381 genes, 0.3%	17 out of 12888 genes, 0.1%	1
molecular_function	polysaccharide binding	6 out of 2381 genes, 0.3%	17 out of 12888 genes, 0.1%	1
molecular_function	lyase activity	79 out of 2381 genes, 3.3%	368 out of 12888 genes, 2.9%	1
molecular_function	carbon-oxygen lyase activity	31 out of 2381 genes, 1.3%	131 out of 12888 genes, 1.0%	1
molecular_function	anion:anion antiporter activity	3 out of 2381 genes, 0.1%	6 out of 12888 genes, 0.0%	1
molecular_function	(S)-2-hydroxy-acid oxidase activity	2 out of 2381 genes, 0.1%	3 out of 12888 genes, 0.0%	1
molecular_function	acidic amino acid transmembrane transporter activity	2 out of 2381 genes, 0.1%	3 out of 12888 genes, 0.0%	1
molecular_function	serine O-acyltransferase activity	2 out of 2381 genes, 0.1%	3 out of 12888 genes, 0.0%	1
molecular_function	L-tryptophan aminotransferase activity	2 out of 2381 genes, 0.1%	3 out of 12888 genes, 0.0%	1
molecular_function	CoA-ligase activity	7 out of 2381 genes, 0.3%	22 out of 12888 genes, 0.2%	1
molecular_function	O-methyltransferase activity	10 out of 2381 genes, 0.4%	35 out of 12888 genes, 0.3%	1
molecular_function	oxidoreductase activity, acting on paired donors, with incorporation or reduction of molecular oxygen, NAD(P)H as one donor, and incorporation of one atom of oxygen	23 out of 2381 genes, 1.0%	95 out of 12888 genes, 0.7%	1
molecular_function	tetrapyrrole binding	6 out of 2381 genes, 0.3%	18 out of 12888 genes, 0.1%	1
molecular_function	protein serine/threonine/tyrosine kinase activity	3 out of 2381 genes, 0.1%	7 out of 12888 genes, 0.1%	1
molecular_function	terpene synthase activity	3 out of 2381 genes, 0.1%	7 out of 12888 genes, 0.1%	1
molecular_function	intramolecular lyase activity	3 out of 2381 genes, 0.1%	7 out of 12888 genes, 0.1%	1
molecular_function	protein kinase regulator activity	3 out of 2381 genes, 0.1%	7 out of 12888 genes, 0.1%	1
molecular_function	drug binding	5 out of 2381 genes, 0.2%	15 out of 12888 genes, 0.1%	1
molecular_function	oxidoreductase activity, acting on single donors with incorporation of molecular oxygen, incorporation of one atom of oxygen (internal monooxygenases or internal mixed function oxidases)	5 out of 2381 genes, 0.2%	15 out of 12888 genes, 0.1%	1
molecular_function	transmembrane transporter activity	157 out of 2381 genes, 6.6%	783 out of 12888 genes, 6.1%	1
molecular_function	phospholipid binding	13 out of 2381 genes, 0.5%	51 out of 12888 genes, 0.4%	1
molecular_function	pattern binding	6 out of 2381 genes, 0.3%	20 out of 12888 genes, 0.2%	1
molecular_function	nucleic acid binding transcription factor activity	73 out of 2381 genes, 3.1%	352 out of 12888 genes, 2.7%	1
molecular_function	basic amino acid transmembrane transporter activity	2 out of 2381 genes, 0.1%	4 out of 12888 genes, 0.0%	1
molecular_function	efflux transmembrane transporter activity	2 out of 2381 genes, 0.1%	4 out of 12888 genes, 0.0%	1
molecular_function	oxidoreductase activity, acting on paired donors, with incorporation or reduction of molecular oxygen, reduced iron-sulfur protein as one donor, and incorporation of one atom of oxygen	2 out of 2381 genes, 0.1%	4 out of 12888 genes, 0.0%	1
molecular_function	divalent inorganic cation transmembrane transporter activity	2 out of 2381 genes, 0.1%	4 out of 12888 genes, 0.0%	1
molecular_function	O-acyltransferase activity	9 out of 2381 genes, 0.4%	34 out of 12888 genes, 0.3%	1
molecular_function	metal ion transmembrane transporter activity	24 out of 2381 genes, 1.0%	106 out of 12888 genes, 0.8%	1
molecular_function	phosphofructokinase activity	4 out of 2381 genes, 0.2%	12 out of 12888 genes, 0.1%	1
molecular_function	oxidoreductase activity, acting on a sulfur group of donors, disulfide as acceptor	4 out of 2381 genes, 0.2%	12 out of 12888 genes, 0.1%	1
molecular_function	hydrolase activity, acting on ether bonds	3 out of 2381 genes, 0.1%	8 out of 12888 genes, 0.1%	1
molecular_function	receptor binding	6 out of 2381 genes, 0.3%	21 out of 12888 genes, 0.2%	1
molecular_function	UDP-galactosyltransferase activity	6 out of 2381 genes, 0.3%	21 out of 12888 genes, 0.2%	1
molecular_function	cytoskeletal protein binding	20 out of 2381 genes, 0.8%	88 out of 12888 genes, 0.7%	1
molecular_function	protein serine/threonine kinase activity	56 out of 2381 genes, 2.4%	270 out of 12888 genes, 2.1%	1
molecular_function	galactosidase activity	10 out of 2381 genes, 0.4%	40 out of 12888 genes, 0.3%	1
molecular_function	metal ion binding	418 out of 2381 genes, 17.6%	2182 out of 12888 genes, 16.9%	1
molecular_function	transferase activity, transferring acyl groups	57 out of 2381 genes, 2.4%	276 out of 12888 genes, 2.1%	1
molecular_function	transferase activity, transferring acyl groups other than amino-acyl groups	51 out of 2381 genes, 2.1%	246 out of 12888 genes, 1.9%	1
molecular_function	actin binding	4 out of 2381 genes, 0.2%	13 out of 12888 genes, 0.1%	1
molecular_function	antiporter activity	7 out of 2381 genes, 0.3%	27 out of 12888 genes, 0.2%	1
molecular_function	kinase regulator activity	3 out of 2381 genes, 0.1%	9 out of 12888 genes, 0.1%	1
molecular_function	cation binding	465 out of 2381 genes, 19.5%	2443 out of 12888 genes, 19.0%	1
molecular_function	alkylbase DNA N-glycosylase activity	2 out of 2381 genes, 0.1%	5 out of 12888 genes, 0.0%	1
molecular_function	endodeoxyribonuclease activity	2 out of 2381 genes, 0.1%	5 out of 12888 genes, 0.0%	1
molecular_function	glucuronosyltransferase activity	2 out of 2381 genes, 0.1%	5 out of 12888 genes, 0.0%	1
molecular_function	C-acetyltransferase activity	2 out of 2381 genes, 0.1%	5 out of 12888 genes, 0.0%	1
molecular_function	myosin binding	2 out of 2381 genes, 0.1%	5 out of 12888 genes, 0.0%	1
molecular_function	myosin tail binding	2 out of 2381 genes, 0.1%	5 out of 12888 genes, 0.0%	1
molecular_function	myosin heavy chain binding	2 out of 2381 genes, 0.1%	5 out of 12888 genes, 0.0%	1
molecular_function	exopeptidase activity	21 out of 2381 genes, 0.9%	98 out of 12888 genes, 0.8%	1
molecular_function	racemase and epimerase activity, acting on carbohydrates and derivatives	5 out of 2381 genes, 0.2%	19 out of 12888 genes, 0.1%	1
molecular_function	acetylglucosaminyltransferase activity	6 out of 2381 genes, 0.3%	24 out of 12888 genes, 0.2%	1
molecular_function	inorganic anion transmembrane transporter activity	7 out of 2381 genes, 0.3%	29 out of 12888 genes, 0.2%	1
molecular_function	anion transmembrane transporter activity	14 out of 2381 genes, 0.6%	64 out of 12888 genes, 0.5%	1
molecular_function	acylglycerol O-acyltransferase activity	4 out of 2381 genes, 0.2%	15 out of 12888 genes, 0.1%	1
molecular_function	oxidosqualene cyclase activity	4 out of 2381 genes, 0.2%	15 out of 12888 genes, 0.1%	1
molecular_function	hexosaminidase activity	2 out of 2381 genes, 0.1%	6 out of 12888 genes, 0.0%	1
molecular_function	ether hydrolase activity	2 out of 2381 genes, 0.1%	6 out of 12888 genes, 0.0%	1
molecular_function	oxidoreductase activity, acting on X-H and Y-H to form an X-Y bond	2 out of 2381 genes, 0.1%	6 out of 12888 genes, 0.0%	1
molecular_function	oxidoreductase activity, acting on X-H and Y-H to form an X-Y bond, with oxygen as acceptor	2 out of 2381 genes, 0.1%	6 out of 12888 genes, 0.0%	1
molecular_function	transaminase activity	12 out of 2381 genes, 0.5%	55 out of 12888 genes, 0.4%	1
molecular_function	ligase activity, forming carbon-sulfur bonds	7 out of 2381 genes, 0.3%	30 out of 12888 genes, 0.2%	1
molecular_function	transporter activity	176 out of 2381 genes, 7.4%	921 out of 12888 genes, 7.1%	1
molecular_function	CoA hydrolase activity	3 out of 2381 genes, 0.1%	11 out of 12888 genes, 0.1%	1
molecular_function	C-acyltransferase activity	3 out of 2381 genes, 0.1%	11 out of 12888 genes, 0.1%	1
molecular_function	UDP-glucosyltransferase activity	16 out of 2381 genes, 0.7%	77 out of 12888 genes, 0.6%	1
molecular_function	tubulin binding	5 out of 2381 genes, 0.2%	21 out of 12888 genes, 0.2%	1
molecular_function	carbohydrate kinase activity	5 out of 2381 genes, 0.2%	21 out of 12888 genes, 0.2%	1
molecular_function	transferase activity, transferring alkyl or aryl (other than methyl) groups	18 out of 2381 genes, 0.8%	89 out of 12888 genes, 0.7%	1
molecular_function	transferase activity, transferring nitrogenous groups	13 out of 2381 genes, 0.5%	63 out of 12888 genes, 0.5%	1
molecular_function	deoxyribonuclease activity	2 out of 2381 genes, 0.1%	7 out of 12888 genes, 0.1%	1
molecular_function	GDP-dissociation inhibitor activity	2 out of 2381 genes, 0.1%	7 out of 12888 genes, 0.1%	1
molecular_function	phosphotransferase activity, carboxyl group as acceptor	2 out of 2381 genes, 0.1%	7 out of 12888 genes, 0.1%	1
molecular_function	xylosyltransferase activity	2 out of 2381 genes, 0.1%	7 out of 12888 genes, 0.1%	1
molecular_function	hydroxymethyl-, formyl- and related transferase activity	4 out of 2381 genes, 0.2%	17 out of 12888 genes, 0.1%	1
molecular_function	steroid dehydrogenase activity, acting on the CH-OH group of donors, NAD or NADP as acceptor	5 out of 2381 genes, 0.2%	23 out of 12888 genes, 0.2%	1
molecular_function	amine-lyase activity	3 out of 2381 genes, 0.1%	13 out of 12888 genes, 0.1%	1
molecular_function	oxidoreductase activity, acting on the aldehyde or oxo group of donors, oxygen as acceptor	2 out of 2381 genes, 0.1%	8 out of 12888 genes, 0.1%	1
molecular_function	phosphate transmembrane transporter activity	2 out of 2381 genes, 0.1%	8 out of 12888 genes, 0.1%	1
molecular_function	lipid binding	14 out of 2381 genes, 0.6%	72 out of 12888 genes, 0.6%	1
molecular_function	carbon-sulfur lyase activity	12 out of 2381 genes, 0.5%	62 out of 12888 genes, 0.5%	1
molecular_function	steroid dehydrogenase activity	5 out of 2381 genes, 0.2%	25 out of 12888 genes, 0.2%	1
molecular_function	hydro-lyase activity	14 out of 2381 genes, 0.6%	74 out of 12888 genes, 0.6%	1
molecular_function	oxo-acid-lyase activity	2 out of 2381 genes, 0.1%	9 out of 12888 genes, 0.1%	1
molecular_function	mannosidase activity	5 out of 2381 genes, 0.2%	26 out of 12888 genes, 0.2%	1
molecular_function	aldehyde-lyase activity	3 out of 2381 genes, 0.1%	15 out of 12888 genes, 0.1%	1
molecular_function	solute:cation antiporter activity	4 out of 2381 genes, 0.2%	21 out of 12888 genes, 0.2%	1
molecular_function	amylase activity	4 out of 2381 genes, 0.2%	21 out of 12888 genes, 0.2%	1
molecular_function	transferase activity, transferring aldehyde or ketonic groups	4 out of 2381 genes, 0.2%	21 out of 12888 genes, 0.2%	1
molecular_function	receptor signaling protein serine/threonine kinase activity	15 out of 2381 genes, 0.6%	82 out of 12888 genes, 0.6%	1
molecular_function	receptor signaling protein activity	15 out of 2381 genes, 0.6%	82 out of 12888 genes, 0.6%	1
molecular_function	racemase and epimerase activity	5 out of 2381 genes, 0.2%	27 out of 12888 genes, 0.2%	1
molecular_function	carbohydrate derivative transporter activity	2 out of 2381 genes, 0.1%	10 out of 12888 genes, 0.1%	1
molecular_function	peptide transporter activity	3 out of 2381 genes, 0.1%	16 out of 12888 genes, 0.1%	1
molecular_function	oxidoreductase activity, acting on paired donors, with oxidation of a pair of donors resulting in the reduction of molecular oxygen to two molecules of water	3 out of 2381 genes, 0.1%	16 out of 12888 genes, 0.1%	1
molecular_function	transition metal ion binding	284 out of 2381 genes, 11.9%	1554 out of 12888 genes, 12.1%	1
molecular_function	oxidoreductase activity, acting on the CH-CH group of donors, oxygen as acceptor	4 out of 2381 genes, 0.2%	22 out of 12888 genes, 0.2%	1
molecular_function	fatty acid synthase activity	5 out of 2381 genes, 0.2%	28 out of 12888 genes, 0.2%	1
molecular_function	alpha-mannosidase activity	2 out of 2381 genes, 0.1%	11 out of 12888 genes, 0.1%	1
molecular_function	mannosyl-oligosaccharide mannosidase activity	2 out of 2381 genes, 0.1%	11 out of 12888 genes, 0.1%	1
molecular_function	DNA N-glycosylase activity	2 out of 2381 genes, 0.1%	11 out of 12888 genes, 0.1%	1
molecular_function	solute:hydrogen antiporter activity	3 out of 2381 genes, 0.1%	17 out of 12888 genes, 0.1%	1
molecular_function	carbon-oxygen lyase activity, acting on phosphates	3 out of 2381 genes, 0.1%	17 out of 12888 genes, 0.1%	1
molecular_function	endoribonuclease activity	4 out of 2381 genes, 0.2%	23 out of 12888 genes, 0.2%	1
molecular_function	cis-trans isomerase activity	10 out of 2381 genes, 0.4%	58 out of 12888 genes, 0.5%	1
molecular_function	carboxy-lyase activity	12 out of 2381 genes, 0.5%	70 out of 12888 genes, 0.5%	1
molecular_function	carbohydrate phosphatase activity	4 out of 2381 genes, 0.2%	24 out of 12888 genes, 0.2%	1
molecular_function	amino acid transmembrane transporter activity	3 out of 2381 genes, 0.1%	18 out of 12888 genes, 0.1%	1
molecular_function	phosphotransferase activity, phosphate group as acceptor	3 out of 2381 genes, 0.1%	18 out of 12888 genes, 0.1%	1
molecular_function	hydrolase activity, hydrolyzing N-glycosyl compounds	3 out of 2381 genes, 0.1%	18 out of 12888 genes, 0.1%	1
molecular_function	endonuclease activity	5 out of 2381 genes, 0.2%	30 out of 12888 genes, 0.2%	1
molecular_function	cofactor binding	76 out of 2381 genes, 3.2%	429 out of 12888 genes, 3.3%	1
molecular_function	Ras GTPase binding	2 out of 2381 genes, 0.1%	12 out of 12888 genes, 0.1%	1
molecular_function	small GTPase binding	2 out of 2381 genes, 0.1%	12 out of 12888 genes, 0.1%	1
molecular_function	GTPase binding	2 out of 2381 genes, 0.1%	12 out of 12888 genes, 0.1%	1
molecular_function	L-tyrosine aminotransferase activity	2 out of 2381 genes, 0.1%	12 out of 12888 genes, 0.1%	1
molecular_function	molecular transducer activity	52 out of 2381 genes, 2.2%	298 out of 12888 genes, 2.3%	1
molecular_function	ribonuclease activity	5 out of 2381 genes, 0.2%	31 out of 12888 genes, 0.2%	1
molecular_function	protein dimerization activity	4 out of 2381 genes, 0.2%	25 out of 12888 genes, 0.2%	1
molecular_function	cation:sugar symporter activity	2 out of 2381 genes, 0.1%	13 out of 12888 genes, 0.1%	1
molecular_function	oxidoreductase activity, acting on the CH-OH group of donors, NAD or NADP as acceptor	31 out of 2381 genes, 1.3%	183 out of 12888 genes, 1.4%	1
molecular_function	oxidoreductase activity, acting on CH-OH group of donors	38 out of 2381 genes, 1.6%	224 out of 12888 genes, 1.7%	1
molecular_function	coenzyme binding	25 out of 2381 genes, 1.0%	150 out of 12888 genes, 1.2%	1
molecular_function	protein tyrosine kinase activity	15 out of 2381 genes, 0.6%	93 out of 12888 genes, 0.7%	1
molecular_function	nucleoside kinase activity	2 out of 2381 genes, 0.1%	14 out of 12888 genes, 0.1%	1
molecular_function	substrate-specific transmembrane transporter activity	96 out of 2381 genes, 4.0%	552 out of 12888 genes, 4.3%	1
molecular_function	vitamin binding	6 out of 2381 genes, 0.3%	40 out of 12888 genes, 0.3%	1
molecular_function	solute:cation symporter activity	3 out of 2381 genes, 0.1%	22 out of 12888 genes, 0.2%	1
molecular_function	transferase activity, transferring pentosyl groups	5 out of 2381 genes, 0.2%	35 out of 12888 genes, 0.3%	1
molecular_function	enzyme activator activity	4 out of 2381 genes, 0.2%	29 out of 12888 genes, 0.2%	1
molecular_function	isomerase activity	42 out of 2381 genes, 1.8%	254 out of 12888 genes, 2.0%	1
molecular_function	GTPase activator activity	3 out of 2381 genes, 0.1%	23 out of 12888 genes, 0.2%	1
molecular_function	Ras GTPase activator activity	3 out of 2381 genes, 0.1%	23 out of 12888 genes, 0.2%	1
molecular_function	symporter activity	3 out of 2381 genes, 0.1%	23 out of 12888 genes, 0.2%	1
molecular_function	methyltransferase activity	32 out of 2381 genes, 1.3%	199 out of 12888 genes, 1.5%	1
molecular_function	carbon-carbon lyase activity	17 out of 2381 genes, 0.7%	111 out of 12888 genes, 0.9%	1
molecular_function	organic acid transmembrane transporter activity	5 out of 2381 genes, 0.2%	37 out of 12888 genes, 0.3%	1
molecular_function	cation transmembrane transporter activity	46 out of 2381 genes, 1.9%	281 out of 12888 genes, 2.2%	1
molecular_function	ion transmembrane transporter activity	69 out of 2381 genes, 2.9%	413 out of 12888 genes, 3.2%	1
molecular_function	transferase activity, transferring one-carbon groups	54 out of 2381 genes, 2.3%	328 out of 12888 genes, 2.5%	1
molecular_function	carboxylic acid transmembrane transporter activity	3 out of 2381 genes, 0.1%	24 out of 12888 genes, 0.2%	1
molecular_function	hydrolase activity, acting on carbon-nitrogen (but not peptide) bonds, in linear amides	6 out of 2381 genes, 0.3%	44 out of 12888 genes, 0.3%	1
molecular_function	DNA helicase activity	2 out of 2381 genes, 0.1%	17 out of 12888 genes, 0.1%	1
molecular_function	aldo-keto reductase (NADP) activity	2 out of 2381 genes, 0.1%	17 out of 12888 genes, 0.1%	1
molecular_function	endoribonuclease activity, producing 5'-phosphomonoesters	2 out of 2381 genes, 0.1%	17 out of 12888 genes, 0.1%	1
molecular_function	NADH dehydrogenase activity	4 out of 2381 genes, 0.2%	31 out of 12888 genes, 0.2%	1
molecular_function	NADH dehydrogenase (quinone) activity	4 out of 2381 genes, 0.2%	31 out of 12888 genes, 0.2%	1
molecular_function	signal transducer activity	41 out of 2381 genes, 1.7%	255 out of 12888 genes, 2.0%	1
molecular_function	hydrolase activity	494 out of 2381 genes, 20.7%	2778 out of 12888 genes, 21.6%	1
molecular_function	iron-sulfur cluster binding	8 out of 2381 genes, 0.3%	58 out of 12888 genes, 0.5%	1
molecular_function	identical protein binding	5 out of 2381 genes, 0.2%	39 out of 12888 genes, 0.3%	1
molecular_function	endonuclease activity, active with either ribo- or deoxyribonucleic acids and producing 5'-phosphomonoesters	2 out of 2381 genes, 0.1%	18 out of 12888 genes, 0.1%	1
molecular_function	inorganic cation transmembrane transporter activity	26 out of 2381 genes, 1.1%	169 out of 12888 genes, 1.3%	1
molecular_function	carboxylic acid binding	6 out of 2381 genes, 0.3%	46 out of 12888 genes, 0.4%	1
molecular_function	oxidoreductase activity, acting on the aldehyde or oxo group of donors	10 out of 2381 genes, 0.4%	72 out of 12888 genes, 0.6%	1
molecular_function	organic anion transmembrane transporter activity	3 out of 2381 genes, 0.1%	26 out of 12888 genes, 0.2%	1
molecular_function	nucleobase-containing compound kinase activity	3 out of 2381 genes, 0.1%	26 out of 12888 genes, 0.2%	1
molecular_function	cation channel activity	5 out of 2381 genes, 0.2%	40 out of 12888 genes, 0.3%	1
molecular_function	anion binding	6 out of 2381 genes, 0.3%	47 out of 12888 genes, 0.4%	1
molecular_function	oxidoreductase activity, acting on the CH-NH2 group of donors, oxygen as acceptor	3 out of 2381 genes, 0.1%	27 out of 12888 genes, 0.2%	1
molecular_function	DNA polymerase activity	3 out of 2381 genes, 0.1%	27 out of 12888 genes, 0.2%	1
molecular_function	DNA binding	51 out of 2381 genes, 2.1%	322 out of 12888 genes, 2.5%	1
molecular_function	oxidoreductase activity, acting on NAD(P)H	13 out of 2381 genes, 0.5%	94 out of 12888 genes, 0.7%	1
molecular_function	voltage-gated ion channel activity	2 out of 2381 genes, 0.1%	20 out of 12888 genes, 0.2%	1
molecular_function	intramolecular transferase activity, phosphotransferases	2 out of 2381 genes, 0.1%	20 out of 12888 genes, 0.2%	1
molecular_function	kinase binding	2 out of 2381 genes, 0.1%	20 out of 12888 genes, 0.2%	1
molecular_function	voltage-gated channel activity	2 out of 2381 genes, 0.1%	20 out of 12888 genes, 0.2%	1
molecular_function	acetyltransferase activity	10 out of 2381 genes, 0.4%	75 out of 12888 genes, 0.6%	1
molecular_function	ion channel activity	9 out of 2381 genes, 0.4%	69 out of 12888 genes, 0.5%	1
molecular_function	substrate-specific channel activity	9 out of 2381 genes, 0.4%	69 out of 12888 genes, 0.5%	1
molecular_function	nucleobase-containing compound transmembrane transporter activity	2 out of 2381 genes, 0.1%	21 out of 12888 genes, 0.2%	1
molecular_function	sugar transmembrane transporter activity	2 out of 2381 genes, 0.1%	21 out of 12888 genes, 0.2%	1
molecular_function	endopeptidase activity	39 out of 2381 genes, 1.6%	256 out of 12888 genes, 2.0%	1
molecular_function	channel activity	9 out of 2381 genes, 0.4%	71 out of 12888 genes, 0.6%	1
molecular_function	passive transmembrane transporter activity	9 out of 2381 genes, 0.4%	71 out of 12888 genes, 0.6%	1
molecular_function	oxidoreductase activity, acting on a sulfur group of donors	12 out of 2381 genes, 0.5%	91 out of 12888 genes, 0.7%	1
molecular_function	peptidase activity	74 out of 2381 genes, 3.1%	464 out of 12888 genes, 3.6%	1
molecular_function	intramolecular transferase activity	8 out of 2381 genes, 0.3%	66 out of 12888 genes, 0.5%	1
molecular_function	peptidase activity, acting on L-amino acid peptides	71 out of 2381 genes, 3.0%	450 out of 12888 genes, 3.5%	1
molecular_function	small GTPase regulator activity	6 out of 2381 genes, 0.3%	53 out of 12888 genes, 0.4%	1
molecular_function	S-adenosylmethionine-dependent methyltransferase activity	7 out of 2381 genes, 0.3%	60 out of 12888 genes, 0.5%	1
molecular_function	hydrogen ion transmembrane transporter activity	8 out of 2381 genes, 0.3%	67 out of 12888 genes, 0.5%	1
molecular_function	aminoacyl-tRNA ligase activity	10 out of 2381 genes, 0.4%	81 out of 12888 genes, 0.6%	1
molecular_function	carbohydrate transmembrane transporter activity	3 out of 2381 genes, 0.1%	32 out of 12888 genes, 0.2%	1
molecular_function	carbohydrate transporter activity	3 out of 2381 genes, 0.1%	32 out of 12888 genes, 0.2%	1
molecular_function	double-stranded DNA binding	2 out of 2381 genes, 0.1%	24 out of 12888 genes, 0.2%	1
molecular_function	substrate-specific transporter activity	105 out of 2381 genes, 4.4%	652 out of 12888 genes, 5.1%	1
molecular_function	transcription factor binding transcription factor activity	3 out of 2381 genes, 0.1%	33 out of 12888 genes, 0.3%	1
molecular_function	N-methyltransferase activity	3 out of 2381 genes, 0.1%	33 out of 12888 genes, 0.3%	1
molecular_function	gated channel activity	2 out of 2381 genes, 0.1%	25 out of 12888 genes, 0.2%	1
molecular_function	ion gated channel activity	2 out of 2381 genes, 0.1%	25 out of 12888 genes, 0.2%	1
molecular_function	disulfide oxidoreductase activity	7 out of 2381 genes, 0.3%	63 out of 12888 genes, 0.5%	1
molecular_function	GTPase regulator activity	6 out of 2381 genes, 0.3%	56 out of 12888 genes, 0.4%	1
molecular_function	nucleoside-triphosphatase regulator activity	6 out of 2381 genes, 0.3%	56 out of 12888 genes, 0.4%	1
molecular_function	helicase activity	4 out of 2381 genes, 0.2%	43 out of 12888 genes, 0.3%	1
molecular_function	oxidoreductase activity, acting on the aldehyde or oxo group of donors, NAD or NADP as acceptor	4 out of 2381 genes, 0.2%	43 out of 12888 genes, 0.3%	1
molecular_function	primary active transmembrane transporter activity	23 out of 2381 genes, 1.0%	172 out of 12888 genes, 1.3%	1
molecular_function	P-P-bond-hydrolysis-driven transmembrane transporter activity	23 out of 2381 genes, 1.0%	172 out of 12888 genes, 1.3%	1
molecular_function	ATPase activity, coupled to transmembrane movement of ions, phosphorylative mechanism	2 out of 2381 genes, 0.1%	27 out of 12888 genes, 0.2%	1
molecular_function	oxidoreductase activity, acting on NAD(P)H, quinone or similar compound as acceptor	5 out of 2381 genes, 0.2%	52 out of 12888 genes, 0.4%	1
molecular_function	potassium channel activity	2 out of 2381 genes, 0.1%	28 out of 12888 genes, 0.2%	1
molecular_function	potassium ion transmembrane transporter activity	2 out of 2381 genes, 0.1%	29 out of 12888 genes, 0.2%	1
molecular_function	hydrolase activity, acting on acid anhydrides, catalyzing transmembrane movement of substances	18 out of 2381 genes, 0.8%	145 out of 12888 genes, 1.1%	1
molecular_function	ATPase activity, coupled to transmembrane movement of ions	11 out of 2381 genes, 0.5%	98 out of 12888 genes, 0.8%	1
molecular_function	thiolester hydrolase activity	4 out of 2381 genes, 0.2%	47 out of 12888 genes, 0.4%	1
molecular_function	protein binding transcription factor activity	3 out of 2381 genes, 0.1%	39 out of 12888 genes, 0.3%	1
molecular_function	small conjugating protein ligase activity	12 out of 2381 genes, 0.5%	106 out of 12888 genes, 0.8%	1
molecular_function	enzyme binding	6 out of 2381 genes, 0.3%	63 out of 12888 genes, 0.5%	1
molecular_function	oxidoreductase activity, acting on the CH-NH2 group of donors	4 out of 2381 genes, 0.2%	48 out of 12888 genes, 0.4%	1
molecular_function	ligase activity, forming carbon-oxygen bonds	10 out of 2381 genes, 0.4%	93 out of 12888 genes, 0.7%	1
molecular_function	ligase activity, forming aminoacyl-tRNA and related compounds	10 out of 2381 genes, 0.4%	93 out of 12888 genes, 0.7%	1
molecular_function	cation-transporting ATPase activity	6 out of 2381 genes, 0.3%	65 out of 12888 genes, 0.5%	1
molecular_function	structure-specific DNA binding	3 out of 2381 genes, 0.1%	41 out of 12888 genes, 0.3%	1
molecular_function	hydrolase activity, acting on carbon-nitrogen (but not peptide) bonds	8 out of 2381 genes, 0.3%	81 out of 12888 genes, 0.6%	1
molecular_function	hydrolase activity, acting on ester bonds	107 out of 2381 genes, 4.5%	698 out of 12888 genes, 5.4%	1
molecular_function	adenyl ribonucleotide binding	263 out of 2381 genes, 11.0%	1606 out of 12888 genes, 12.5%	1
molecular_function	ATPase activity, coupled to transmembrane movement of substances	16 out of 2381 genes, 0.7%	140 out of 12888 genes, 1.1%	1
molecular_function	adenyl nucleotide binding	263 out of 2381 genes, 11.0%	1607 out of 12888 genes, 12.5%	1
molecular_function	ATPase activity, coupled to movement of substances	16 out of 2381 genes, 0.7%	141 out of 12888 genes, 1.1%	1
molecular_function	acid-amino acid ligase activity	14 out of 2381 genes, 0.6%	128 out of 12888 genes, 1.0%	1
molecular_function	monovalent inorganic cation transmembrane transporter activity	15 out of 2381 genes, 0.6%	135 out of 12888 genes, 1.0%	1
molecular_function	intramolecular oxidoreductase activity	2 out of 2381 genes, 0.1%	35 out of 12888 genes, 0.3%	1
molecular_function	protein binding	115 out of 2381 genes, 4.8%	757 out of 12888 genes, 5.9%	1
molecular_function	nucleotide binding	388 out of 2381 genes, 16.3%	2333 out of 12888 genes, 18.1%	1
molecular_function	nucleoside phosphate binding	388 out of 2381 genes, 16.3%	2333 out of 12888 genes, 18.1%	1
molecular_function	nuclease activity	11 out of 2381 genes, 0.5%	111 out of 12888 genes, 0.9%	1
molecular_function	metal cluster binding	8 out of 2381 genes, 0.3%	89 out of 12888 genes, 0.7%	1
molecular_function	N-acyltransferase activity	3 out of 2381 genes, 0.1%	49 out of 12888 genes, 0.4%	1
molecular_function	phosphoric ester hydrolase activity	41 out of 2381 genes, 1.7%	319 out of 12888 genes, 2.5%	1
molecular_function	small molecule binding	395 out of 2381 genes, 16.6%	2393 out of 12888 genes, 18.6%	1
molecular_function	N-acetyltransferase activity	2 out of 2381 genes, 0.1%	42 out of 12888 genes, 0.3%	1
molecular_function	ribonucleotide binding	282 out of 2381 genes, 11.8%	1819 out of 12888 genes, 14.1%	1
molecular_function	purine ribonucleotide binding	282 out of 2381 genes, 11.8%	1819 out of 12888 genes, 14.1%	1
molecular_function	purine nucleotide binding	282 out of 2381 genes, 11.8%	1820 out of 12888 genes, 14.1%	1
molecular_function	nucleoside-triphosphatase activity	102 out of 2381 genes, 4.3%	751 out of 12888 genes, 5.8%	1
molecular_function	ligase activity, forming carbon-nitrogen bonds	19 out of 2381 genes, 0.8%	206 out of 12888 genes, 1.6%	1
molecular_function	phosphatase activity	29 out of 2381 genes, 1.2%	280 out of 12888 genes, 2.2%	1
molecular_function	RNA polymerase activity	3 out of 2381 genes, 0.1%	73 out of 12888 genes, 0.6%	1
molecular_function	ligase activity	40 out of 2381 genes, 1.7%	360 out of 12888 genes, 2.8%	1
molecular_function	hydrolase activity, acting on acid anhydrides	114 out of 2381 genes, 4.8%	839 out of 12888 genes, 6.5%	1
molecular_function	phosphoprotein phosphatase activity	8 out of 2381 genes, 0.3%	122 out of 12888 genes, 0.9%	1
molecular_function	pyrophosphatase activity	111 out of 2381 genes, 4.7%	824 out of 12888 genes, 6.4%	1
molecular_function	hydrolase activity, acting on acid anhydrides, in phosphorus-containing anhydrides	111 out of 2381 genes, 4.7%	828 out of 12888 genes, 6.4%	1
molecular_function	guanyl nucleotide binding	19 out of 2381 genes, 0.8%	221 out of 12888 genes, 1.7%	1
molecular_function	guanyl ribonucleotide binding	19 out of 2381 genes, 0.8%	221 out of 12888 genes, 1.7%	1
molecular_function	binding	1327 out of 2381 genes, 55.7%	7740 out of 12888 genes, 60.1%	1
molecular_function	translation factor activity, nucleic acid binding	5 out of 2381 genes, 0.2%	117 out of 12888 genes, 0.9%	1
molecular_function	RNA binding	20 out of 2381 genes, 0.8%	254 out of 12888 genes, 2.0%	1
molecular_function	nucleotidyltransferase activity	9 out of 2381 genes, 0.4%	161 out of 12888 genes, 1.2%	1
molecular_function	organic cyclic compound binding	578 out of 2381 genes, 24.3%	3655 out of 12888 genes, 28.4%	1
molecular_function	ATPase activity, coupled	27 out of 2381 genes, 1.1%	311 out of 12888 genes, 2.4%	1
molecular_function	heterocyclic compound binding	577 out of 2381 genes, 24.2%	3652 out of 12888 genes, 28.3%	1
molecular_function	ATPase activity	28 out of 2381 genes, 1.2%	331 out of 12888 genes, 2.6%	1
molecular_function	nucleic acid binding	199 out of 2381 genes, 8.4%	1465 out of 12888 genes, 11.4%	1
molecular_function	structural molecule activity	20 out of 2381 genes, 0.8%	298 out of 12888 genes, 2.3%	1
biological_process	Secondary metabolic process	53 out of 1931 genes, 2.7%	168 out of 10716 genes, 1.6%	0.01036
biological_process	programmed cell death	25 out of 1931 genes, 1.3%	61 out of 10716 genes, 0.6%	0.01749
biological_process	L-phenylalanine metabolic process	10 out of 1931 genes, 0.5%	15 out of 10716 genes, 0.1%	0.03358
biological_process	phenylpropanoid metabolic process	46 out of 1931 genes, 2.4%	146 out of 10716 genes, 1.4%	0.03894
biological_process	drug transport	20 out of 1931 genes, 1.0%	47 out of 10716 genes, 0.4%	0.06043
biological_process	response to drug	20 out of 1931 genes, 1.0%	47 out of 10716 genes, 0.4%	0.06043
biological_process	cell death	25 out of 1931 genes, 1.3%	65 out of 10716 genes, 0.6%	0.0617
biological_process	death	25 out of 1931 genes, 1.3%	65 out of 10716 genes, 0.6%	0.0617
biological_process	polysaccharide metabolic process	56 out of 1931 genes, 2.9%	194 out of 10716 genes, 1.8%	0.0968
biological_process	secondary metabolite biosynthetic process	32 out of 1931 genes, 1.7%	96 out of 10716 genes, 0.9%	0.16648
biological_process	phenylpropanoid biosynthetic process	31 out of 1931 genes, 1.6%	92 out of 10716 genes, 0.9%	0.16667
biological_process	zinc ion transport	8 out of 1931 genes, 0.4%	12 out of 10716 genes, 0.1%	0.20857
biological_process	aromatic amino acid family metabolic process	15 out of 1931 genes, 0.8%	34 out of 10716 genes, 0.3%	0.29245
biological_process	glucan metabolic process	41 out of 1931 genes, 2.1%	143 out of 10716 genes, 1.3%	0.85264
biological_process	aminoglycan metabolic process	11 out of 1931 genes, 0.6%	24 out of 10716 genes, 0.2%	1
biological_process	aminoglycan catabolic process	10 out of 1931 genes, 0.5%	21 out of 10716 genes, 0.2%	1
biological_process	transition metal ion transport	20 out of 1931 genes, 1.0%	58 out of 10716 genes, 0.5%	1
biological_process	carbohydrate metabolic process	107 out of 1931 genes, 5.5%	470 out of 10716 genes, 4.4%	1
biological_process	single-organism biosynthetic process	72 out of 1931 genes, 3.7%	302 out of 10716 genes, 2.8%	1
biological_process	response to stimulus	449 out of 1931 genes, 23.3%	2264 out of 10716 genes, 21.1%	1
biological_process	external encapsulating structure organization	41 out of 1931 genes, 2.1%	158 out of 10716 genes, 1.5%	1
biological_process	polysaccharide catabolic process	8 out of 1931 genes, 0.4%	18 out of 10716 genes, 0.2%	1
biological_process	hormone metabolic process	11 out of 1931 genes, 0.6%	30 out of 10716 genes, 0.3%	1
biological_process	divalent inorganic cation homeostasis	5 out of 1931 genes, 0.3%	9 out of 10716 genes, 0.1%	1
biological_process	hydrogen peroxide metabolic process	9 out of 1931 genes, 0.5%	23 out of 10716 genes, 0.2%	1
biological_process	embryo development ending in seed dormancy	7 out of 1931 genes, 0.4%	16 out of 10716 genes, 0.1%	1
biological_process	amine transport	6 out of 1931 genes, 0.3%	13 out of 10716 genes, 0.1%	1
biological_process	manganese ion transport	3 out of 1931 genes, 0.2%	4 out of 10716 genes, 0.0%	1
biological_process	cell wall polysaccharide metabolic process	4 out of 1931 genes, 0.2%	7 out of 10716 genes, 0.1%	1
biological_process	cell wall macromolecule metabolic process	4 out of 1931 genes, 0.2%	7 out of 10716 genes, 0.1%	1
biological_process	carbohydrate derivative catabolic process	10 out of 1931 genes, 0.5%	29 out of 10716 genes, 0.3%	1
biological_process	indole-containing compound metabolic process	7 out of 1931 genes, 0.4%	18 out of 10716 genes, 0.2%	1
biological_process	cell wall organization	18 out of 1931 genes, 0.9%	64 out of 10716 genes, 0.6%	1
biological_process	xylem and phloem pattern formation	8 out of 1931 genes, 0.4%	22 out of 10716 genes, 0.2%	1
biological_process	response to boron-containing substance	2 out of 1931 genes, 0.1%	2 out of 10716 genes, 0.0%	1
biological_process	cadmium ion transport	2 out of 1931 genes, 0.1%	2 out of 10716 genes, 0.0%	1
biological_process	histone phosphorylation	2 out of 1931 genes, 0.1%	2 out of 10716 genes, 0.0%	1
biological_process	peptidyl-serine phosphorylation	2 out of 1931 genes, 0.1%	2 out of 10716 genes, 0.0%	1
biological_process	peptidyl-serine modification	2 out of 1931 genes, 0.1%	2 out of 10716 genes, 0.0%	1
biological_process	regulation of Rho GTPase activity	2 out of 1931 genes, 0.1%	2 out of 10716 genes, 0.0%	1
biological_process	positive regulation of Rho GTPase activity	2 out of 1931 genes, 0.1%	2 out of 10716 genes, 0.0%	1
biological_process	regulation of Rho protein signal transduction	2 out of 1931 genes, 0.1%	2 out of 10716 genes, 0.0%	1
biological_process	histone-serine phosphorylation	2 out of 1931 genes, 0.1%	2 out of 10716 genes, 0.0%	1
biological_process	fluid transport	2 out of 1931 genes, 0.1%	2 out of 10716 genes, 0.0%	1
biological_process	jasmonic acid metabolic process	6 out of 1931 genes, 0.3%	15 out of 10716 genes, 0.1%	1
biological_process	embryo development	9 out of 1931 genes, 0.5%	27 out of 10716 genes, 0.3%	1
biological_process	fatty acid biosynthetic process	14 out of 1931 genes, 0.7%	49 out of 10716 genes, 0.5%	1
biological_process	microtubule cytoskeleton organization	5 out of 1931 genes, 0.3%	12 out of 10716 genes, 0.1%	1
biological_process	response to biotic stimulus	39 out of 1931 genes, 2.0%	168 out of 10716 genes, 1.6%	1
biological_process	nucleosome organization	12 out of 1931 genes, 0.6%	41 out of 10716 genes, 0.4%	1
biological_process	steroid hormone mediated signaling pathway	8 out of 1931 genes, 0.4%	24 out of 10716 genes, 0.2%	1
[truncated: 716 more rows]

## Sheet: 3Avs4A
cellular_component	Gene Ontology term	Cluster frequency	Genome frequency of use	Corrected P-value
[truncated: 1,014 more rows]
