# Supplementary material for: Transcriptomic Analysis of Grapevine (cv. Summer Black) Leaf, Using the Illumina Platform
Source: PLoS One. 2016 Jan 29;11(1):e0147369. doi: 10.1371/journal.pone.0147369 (PMC4732810; doi:10.1371/journal.pone.0147369)
Supplement: S3 File — (XLS) [file pone.0147369.s003.xls]

## Sheet: Sheet1
Supplemental Table
KEGG pathways
Biosynthesis Pathways
Chlorophyll metabolism pathway [PATH: 001860]
Plant Horomone signal Transduction [PATH: 4075]
Photosynthesis [PATH: 00195]
Secondary metabolism biosynthetic pathways
Indole Alkaloid Biosynthetic Pathway [PATH: 00901]
Isoquinoline alkaloid biosynthesis [PATH: 00950]
Anthocyanins Biosynthetic Pathway [PATH: 00942]
Diterpenoid Biosynthesis [PATH: 00904]
Monoterpenoid Biosynthesis [PATH: 00902]
Flavonoids Biosynthesis [PATH: 00941]
